# Supplementary material for: Genome-Wide Association Study on Seedling Phenotypic Traits of Wheat under Different Nitrogen Conditions
Source: Plants (Basel). 2023 Dec 1;12(23):4050. doi: 10.3390/plants12234050 (PMC10707948; doi:10.3390/plants12234050)
Supplement: Supplementary file 1 [file plants-12-04050-s001.zip]

Archive with 4 entries (4 files):
- Supplementary Marterial.pdf
- Table S1.xlsx
- Table S2.xlsx
- Table S3.xlsx
