# Supplementary material for: Genome-Wide Association Study on Seedling Phenotypic Traits of Wheat under Different Nitrogen Conditions
Source: Plants (Basel). 2023 Dec 1;12(23):4050. doi: 10.3390/plants12234050 (PMC10707948; doi:10.3390/plants12234050)
Supplement: Supplementary file 1 [file plants-12-04050-s001.zip › Table S1.xlsx]

## Sheet: Sheet1
Table S1: Variety name and origin of 204 wheat materials
Variety name	place of origin (Province)
AK58	Henan
Yumai 2	Henan
CA57	Synthetic
Zhengnong 7	Henan
Tianmingaizao 8A	Henan
Gaoyou 503	Hebei
Guan 35	Hebei
Xiaoyan 22-10	Shanxi
Baiquan 3039	Henan
Lankao 52-24(changfangsui)	Henan
Mianyang 39	Sichuan
Yangmai 15	Jiangsu
Chinese Spring	Sichuan
Chuanmai 41	Sichuan
Chuanmai 44	Sichuan
Chuanmai 46	Sichuan
Chuanmai 53	Sichuan
Chuanmai 54	Sichuan
Chuanmai 68	Sichuan
Chuanmai 601	Sichuan
Chuanmai 604	Sichuan
Mianmai 161	Sichuan
Mianmai 827	Sichuan
Mianmai 902	Sichuan
Mianmai 903	Sichuan
Mianmai 904	Sichuan
Mianmai 1302	Sichuan
Mianmai 1416	Sichuan
Mianmai 1419	Sichuan
20y1-14	Yunnan
20y1-33	Yunnan
20y1-84	Yunnan
20y1-133	Yunnan
20y1-206	Yunnan
20y1-217	Yunnan
20y1-221	Yunnan
20y1-323	Yunnan
20y1-524	Yunnan
20y1-719	Yunnan
20y1-746	Yunnan
20y1-964	Yunnan
20y1-1591	Yunnan
Yunmai 112	Yunnan
Xindong 1	Xinjinag
Xindong 4	Xinjinag
Xindong 5	Xinjinag
Xindong 7	Xinjinag
Xindong 11	Xinjinag
Xindong 12	Xinjinag
Xindong 14	Xinjinag
Xindong 15	Xinjinag
Xindong 16	Xinjinag
Xindong 17	Xinjinag
Xindong 18	Xinjinag
Xindong 19	Xinjinag
Xindong 20	Xinjinag
Xindong 22	Xinjinag
Xindong 23	Xinjinag
Xindong 24	Xinjinag
Xindong 25	Xinjinag
Xindong 26	Xinjinag
Xindong 27	Xinjinag
Xindong 28	Xinjinag
Xindong 33	Xinjinag
Xindong 35	Xinjinag
Xindong 37	Xinjinag
Xindong 41	Xinjinag
Xindong 57	Xinjinag
BL6213	Yunnan
BL6310	Yunnan
Caifu 589	HeNan
Hanmai 15	Hebei
Hanmai 16	Hebei
Hannong 2009	Hebei
Hansheng 730	Hebei
Henong 7069	Hebei
Heng 4399	Hebei
Heng 4444	Hebei
Heng 6632	Hebei
Heng S29	Hebei
Ji 7369	Hebei
Jimai 120	Hebei
Jimai 325	Hebei
Jimai 518	Hebei
Jizhognan 5290	Hebei
Jizhognan 6049	Hebei
Jinnong 58	Hebei
Kenong 2011	Hebei
Lunxuan 103	Hebei
Nongda 399	Hebei
Shi 4366	Hebei
Shimai 15	Hebei
Shinong 086	Hebei
Shinong 952	Hebei
Xinnong 296	Shandong
Xingmai 13	Hebei
Xingmai 6	Hebei
Xingmai 7	Hebei
Yingbo 700	Hebei
Zhongxin 99	Hebei
Emmer-ZK331	NA
3690	Yunnan
Zhoumai 18-1	Henan
Zhoumai 37	Henan
08 lu0 33	Henan
Bainong 8822	Henan
2015G88	NA
Changmai20-2	Henan
Gaobeidian-1	Hebei
Hefeng 3	HeNan
Chengdu 58769	Sichuan
Liai 4330-1	Shanxi
Guanmai 2	Henan
Mo 176	NA
Neixiang 188	Henan
Luomai 33	Henan
Shenqiuzhidianzao	Henan
Neimai 9	Sichuan
Zhengmai 0856	Henan
Yunnan 0186	Yunnan
Wanfeng 269	Henan
Yunnan 0456	Yunnan
Yunnan 0261	Yunnan
Yunnan 0581	Yunnan
Yunnan 0881	Yunnan
Yunnan 0643	Yunnan
Yunnan 1638	Yunnan
Yunnan 1617	Yunnan
Jimai 27	Shandong
Jimai 28	Shandong
Jimai 31	Shandong
Chuan 17 pin 65	Sichuan
Chuanmai 104	Sichuan
Chuanmai 56	Sichuan
Chuanmai 58	Sichuan
Chuanmai 91	Sichuan
Chuanyu 25	Sichuan
Chuanyu 26	Sichuan
Kechengmai 4	Sichuan
Kechengmai 6	Sichuan
Mianmai 43	Sichuan
Shumai 393	Sichuan
Shumai 415	Sichuan
Shumai 580	Sichuan
Shumai 753	Sichuan
Shumai 921	Sichuan
Shumai 969	Sichuan
Huanuo 1	Guangdong
Jimai 44	Shandong
Xiaheyinbai	Gansu
Zhongyinworuan	NA
Caifumai	NA
Huxiaoyan	NA
Jianadaruanmai	NA
Nandaketa 1607	NA
KPL-1	NA
Pandaola	NA
MoS139	NA
Yidalibaimai	Italy
Lier-7	France
Wudahu	America
Zhiaizao	NA
Moteda	NA
MRYC	NA
MR168	NA
Fengyou 7	Guizhou
Shengxuan 4	Jiangsu
Shengxuan 5	Jiangsu
P144	NA
Bainongtianshan 1	NA
Aoayou 1	Australia
NSR-5	NA
Jaggar-1	NA
Aidabing 1633 bai	NA
Xiadachun 16	NA
Niaomai	NA
Xiaobingmai 33	NA
Yemao	Canada
Baimai 2577	NA
Caiyuan 589	NA
Heihe 120	NA
Hua 1028	NA
Kangbai 4199	NA
Hangyetubuianti 58EMS-48-1	NA
Hangyetubuianti 58EMS-48-2	NA
Yunnantiekemai 1	Yunnan
Yunnantiekemai 2	Yunnan
Fangyumai 66	Henan
Qinnanmai	NA
Xiadachun 1	NA
Yingzhibolaite	NA
09 zhiyin 1	NA
09 zhiyin 3	NA
CIKO	NA
Saersibao	Austria
Meiguo-2	NA
Emai 19	HuBei
Tuwuda	NA
Ningdong 11	Ningxia
Ningxia 1505	Ningxia
Ningxia 1506	Ningxia
Pubing 2011	Hebei
Aizhao 3	NA
Aizhao 6	NA
