# Supplementary material for: Genome-Wide Association Study on Seedling Phenotypic Traits of Wheat under Different Nitrogen Conditions
Source: Plants (Basel). 2023 Dec 1;12(23):4050. doi: 10.3390/plants12234050 (PMC10707948; doi:10.3390/plants12234050)
Supplement: Supplementary file 1 [file plants-12-04050-s001.zip › Table S2.xlsx]

## Sheet: Sheet1
Table 2: The SNPs significantly associated with nine root and seedling bioNass traits for each environNent based on BLUP values.Trait abbreviation: RLH, root length in high nitrogen environNent; RLN, root length under norNal nitrogen environNent; RLL, root length in low nitrogen environNent; RFWH, root fresh weight in high nitrogen environNent; RFWN, root fresh weight under norNal nitrogen enviro…
Trait	SNP	Chromosome	Position	P value	R2
RDWH	AX-108917558	5A	10014822	0.00012686	0.09099
RDWH	AX-111716200	1D	11542968	6.5939e-05	0.09795
RDWH	AX-110554286	3B	24784329	0.00028215	0.08254
RDWH	AX-169335096	4D	26154697	0.00014868	0.0893
RDWH	AX-110629944	3B	30535199	0.00080098	0.07201
RDWH	AX-110386267	3B	31054237	0.00091828	0.0702
RDWH	AX-109539037	3B	31295895	0.00023337	0.08454
RDWH	AX-110033392	3B	31341326	0.00071404	0.07282
RDWH	AX-109892929	3B	31901321	0.0006322	0.0742
RDWH	AX-110026721	2A	34322083	0.00054807	0.07558
RDWH	AX-109954487	1A	43571899	0.00046784	0.0781
RDWH	AX-111258488	5A	54746459	0.00037197	0.08032
RDWH	AX-109059071	5A	70532463	0.00042109	0.07918
RDWH	AX-111071864	5A	71398743	0.00049345	0.07668
RDWH	AX-110010306	5A	81277686	0.00055948	0.07536
RDWH	AX-109541761	5A	87419325	0.00053015	0.07782
RDWH	AX-110378203	5A	88484405	0.0001049	0.09538
RDWH	AX-108784117	5A	103425842	0.00056051	0.07535
RDWH	AX-111194429	5A	109305118	0.00050098	0.07652
RDWH	AX-109867835	6A	176372617	0.0004726	0.07713
RDWH	AX-110517961	1B	322472432	2.3357e-05	0.10909
RDWH	AX-111482877	1B	366492631	0.00096817	0.06965
RDWH	AX-111028996	1B	366927312	0.00017983	0.08885
RDWH	AX-109038149	1B	372382404	0.00080012	0.07226
RDWH	AX-111761123	5B	387348283	0.00044803	0.07769
RDWH	AX-110522270	1B	388015630	2.6764e-07	0.15842
RDWH	AX-111035187	5D	429360696	0.00059277	0.07476
RDWH	AX-109912303	5D	435783753	0.00041621	0.07892
RDWH	AX-109939697	5B	439950687	0.00088781	0.07098
RDWH	AX-111494293	5A	450258314	0.00080483	0.07157
RDWH	AX-109741930	6D	467207505	0.00084528	0.07191
RDWH	AX-108728939	6D	467275241	0.000655	0.07432
RDWH	AX-109846912	6D	468103512	0.00098424	0.07038
RDWH	AX-111041495	6D	468153391	0.00067327	0.07343
RDWH	AX-111369489	6D	468691174	0.000655	0.07432
RDWH	AX-94574625	6D	468879554	0.00042972	0.07813
RDWH	AX-110461823	6D	468887980	0.00035578	0.08127
RDWH	AX-111709193	6D	469047828	0.00027825	0.08337
RDWH	AX-108966945	6D	469077159	0.00055597	0.07543
RDWH	AX-109968823	6D	469214405	0.00032137	0.08211
RDWH	AX-111015834	6D	469248189	0.00016874	0.08921
RDWH	AX-111197968	6D	469250257	0.00015718	0.08909
RDWH	AX-111867096	6D	469252708	0.00049546	0.07663
RDWH	AX-109142085	6D	469365122	0.00043508	0.07902
RDWH	AX-108935293	6D	469374291	0.0002789	0.08338
RDWH	AX-110628600	6D	469392842	0.0002723	0.08392
RDWH	AX-109360092	6D	469394242	0.0002651	0.08394
RDWH	AX-110289046	6D	469425842	0.00024656	0.08505
RDWH	AX-110818116	6D	469430832	0.00058755	0.07526
RDWH	AX-110232069	6D	469562792	0.00026389	0.08396
RDWH	AX-110940681	6D	469567041	0.00028088	0.08351
RDWH	AX-109328766	6D	470642177	9.2836e-05	0.0943
RDWH	AX-108732167	6D	470690794	0.00010634	0.09286
RDWH	AX-111043108	6D	470749600	0.00012849	0.09085
RDWH	AX-110165205	6D	470846916	0.00086174	0.07086
RDWH	AX-110610151	5A	471202134	0.00042128	0.07833
RDWH	AX-89372694	6D	471905419	0.00050807	0.07637
RDWH	AX-111099988	1B	473104198	0.00060359	0.07457
RDWH	AX-109997234	1B	481322282	0.00054664	0.07561
RDWH	AX-108737382	1B	509107170	0.00047892	0.07777
RDWH	AX-110598536	1B	509300586	0.00043304	0.0785
RDWH	AX-94442756	1B	509901004	0.0008613	0.07087
RDWH	AX-111654233	1B	510309894	7.8931e-05	0.09644
RDWH	AX-109832961	1B	512132116	0.00026227	0.08331
RDWH	AX-109819102	5A	528270312	2.8586e-06	0.132
RDWH	AX-111508984	1B	602167843	6.3601e-05	0.09834
RDWH	AX-109273321	4B	608984392	3.619e-06	0.1294
RDWH	AX-94567789	7D	623541660	9.0629e-05	0.09461
RDWH	AX-108790526	5B	655142224	0.00051206	0.07636
RDWH	AX-111550343	2A	675748709	0.00070717	0.07292
RDWH	AX-110683785	5A	691085466	0.00048294	0.0769
RDWL	AX-110168600	3A	20231911	0.00035414	0.08169
RDWL	AX-110483957	7A	20477304	9.2759e-05	0.09731
RDWL	AX-109361752	7A	22928681	0.00016513	0.08981
RDWL	AX-110481731	7A	23079649	7.2497e-05	0.09872
RDWL	AX-110940446	7A	23344643	0.00015706	0.09095
RDWL	AX-110607926	6B	29357151	0.00086595	0.07211
RDWL	AX-111702915	1D	37888748	0.00084586	0.07279
RDWL	AX-89698184	5D	40789089	0.00099502	0.07163
RDWL	AX-110002732	6D	54073201	0.00013484	0.092
RDWL	AX-111119693	6A	94367672	0.00080092	0.07294
RDWL	AX-111493035	6A	293145390	0.00016521	0.08981
RDWL	AX-111028996	1B	366927312	0.00038337	0.08123
RDWL	AX-109038149	1B	372382404	0.00057302	0.07689
RDWL	AX-111695833	1B	374522868	0.00048407	0.07829
RDWL	AX-110523444	1B	380887275	0.00079112	0.07307
RDWL	AX-108871687	6B	553420734	0.00056507	0.07664
RDWL	AX-111721212	5D	553775393	0.00088367	0.07189
RDWL	AX-109298048	3B	562062609	0.00045343	0.07899
RDWL	AX-108847203	1A	567714120	0.00061514	0.07574
RDWL	AX-111521500	1B	580216347	7.8528e-05	0.09995
RDWL	AX-94703387	3D	611497288	0.00098798	0.07094
RDWL	AX-110593429	1B	635359148	0.0003148	0.08303
RDWL	AX-108786044	2A	698009743	0.00041189	0.08001
RDWL	AX-109823294	7A	722178033	0.00072066	0.07598
RDWL	AX-111626728	7A	722234762	0.00070749	0.07494
RDWN	AX-111363285	1D	21669781	0.00091943	0.07051
RDWN	AX-111904446	1D	21722809	0.00096773	0.0698
RDWN	AX-109326114	1D	21743856	0.00020887	0.08589
RDWN	AX-110832745	1D	21814742	0.00024484	0.08421
RDWN	AX-110521132	1B	366214736	0.00069053	0.07332
RDWN	AX-111028996	1B	366927312	0.0007054	0.07337
RDWN	AX-111583289	1B	392738625	0.00094799	0.07142
RDWN	AX-108910861	1B	393081047	0.0007665	0.07223
RDWN	AX-111717169	1B	393512736	0.00030155	0.08201
RDWN	AX-108972198	1B	393652171	0.00051927	0.0763
RDWN	AX-108850781	1B	393715656	0.00069796	0.07327
RDWN	AX-111153034	1B	393998509	0.00038407	0.08134
RDWN	AX-110916562	1B	394033627	0.00083242	0.07253
RDWN	AX-94438518	1A	394593229	0.00067908	0.07349
RDWN	AX-109523456	1B	403418894	0.00077989	0.07205
RDWN	AX-108962141	1B	403813869	4.8846e-05	0.10268
RDWN	AX-109272373	1B	404523501	0.00055604	0.07558
RDWN	AX-110642958	1B	405179764	0.0008331	0.07136
RDWN	AX-111161220	1B	414806318	0.00097142	0.06979
RDWN	AX-109621732	2B	456322107	0.00095014	0.06999
RDWN	AX-111575379	2B	461886409	0.00095507	0.06994
RDWN	AX-108871687	6B	553420734	0.00060019	0.07478
RDWN	AX-108847203	1A	567714120	0.00030496	0.08189
RDWN	AX-111170306	1A	567967912	0.00013254	0.09134
RFWH	AX-111472941	2D	15737579	0.00079918	0.06953
RFWH	AX-109218031	2D	17091028	0.000707	0.07077
RFWH	AX-108854986	2D	17400353	0.00027804	0.08138
RFWH	AX-110513125	2D	17431546	0.00015804	0.08605
RFWH	AX-108725951	2D	17469329	0.0001058	0.09019
RFWH	AX-110525380	3B	25322853	4.8334e-05	0.10118
RFWH	AX-111139240	1A	41150360	0.00069886	0.07089
RFWH	AX-110402352	1A	41375014	3.0779e-05	0.10321
RFWH	AX-109289764	5A	53361359	8.2931e-05	0.0927
RFWH	AX-111699124	7A	55368883	0.00074159	0.07213
RFWH	AX-111123274	5B	58333295	0.00098945	0.06768
RFWH	AX-109399079	3B	62976210	0.0007404	0.07031
RFWH	AX-109284888	5A	68545999	0.00029736	0.08106
RFWH	AX-109420851	5B	70675205	2.8952e-06	0.13065
RFWH	AX-111614446	5B	72655523	0.00017283	0.08542
RFWH	AX-110389324	3B	80543949	2.2748e-05	0.10617
RFWH	AX-110646335	3B	82040348	0.00047355	0.07727
RFWH	AX-110570990	6D	94277759	0.00053512	0.0736
RFWH	AX-111581139	5A	107393647	0.00075754	0.07038
RFWH	AX-111660154	4A	122539794	0.00037066	0.07796
RFWH	AX-110031442	6B	129852487	0.00019888	0.08369
RFWH	AX-111456517	3D	132870984	0.00012517	0.09131
RFWH	AX-108936564	6D	152266122	0.0005725	0.07291
RFWH	AX-109511525	6B	185660094	0.00090858	0.07057
RFWH	AX-108855910	6D	198139176	0.0004001	0.07667
RFWH	AX-110609591	5B	206888469	0.00072337	0.07054
RFWH	AX-108937379	5B	216860872	6.8156e-05	0.09473
RFWH	AX-111017299	5B	229694447	0.00046531	0.07502
RFWH	AX-111878449	6D	236957054	0.00084144	0.06901
RFWH	AX-110331697	6D	241718411	0.00059015	0.0726
RFWH	AX-108865735	5B	242566809	0.00016516	0.0856
RFWH	AX-110529388	3B	253149433	5.9603e-05	0.09612
RFWH	AX-109885946	3B	256543783	0.00010931	0.08999
RFWH	AX-108748429	3B	257583571	2.5728e-05	0.10488
RFWH	AX-109989549	3B	264572993	0.00094575	0.06804
RFWH	AX-111175023	3D	289108085	0.00085904	0.07032
RFWH	AX-109430714	3D	334056662	0.00068459	0.0711
RFWH	AX-110676362	5D	353010493	5.7725e-05	0.09697
RFWH	AX-110955739	3B	364016809	0.00089358	0.06841
RFWH	AX-95197811	3D	374928862	0.00056236	0.07309
RFWH	AX-111066015	5A	380883048	0.00041972	0.07606
RFWH	AX-110490898	5B	391687948	0.00024579	0.08157
RFWH	AX-94853100	3D	393655296	0.00041459	0.07658
RFWH	AX-109279452	5A	408453723	0.00042764	0.07587
RFWH	AX-111026741	5A	408507683	1.2153e-05	0.11462
RFWH	AX-89596767	7B	412298952	0.0002466	0.08149
RFWH	AX-110508884	5A	428416594	0.00038041	0.07707
RFWH	AX-111136203	5A	430037662	0.00019147	0.08408
RFWH	AX-108925104	5A	430602625	0.0005548	0.07323
RFWH	AX-109446853	5A	441137818	0.00068189	0.07116
RFWH	AX-109885340	5A	448565952	0.00076567	0.06997
RFWH	AX-108966524	5A	455456121	0.00074849	0.0702
RFWH	AX-109880001	5A	456028678	0.0008805	0.06985
RFWH	AX-110964991	6D	466818632	0.00064877	0.07164
RFWH	AX-110610151	5A	471202134	0.00074997	0.07018
RFWH	AX-111653182	6B	474400818	0.00031601	0.07896
RFWH	AX-111157940	5D	478686148	4.5565e-05	0.09892
RFWH	AX-111060003	7B	480206208	0.00076281	0.07012
RFWH	AX-110543941	3B	489642628	0.00047522	0.0748
RFWH	AX-110547688	3B	491254988	0.00035301	0.07925
RFWH	AX-109846762	5D	493526218	0.00040702	0.07638
RFWH	AX-111221059	3B	495812507	0.00040784	0.07636
RFWH	AX-108734257	1A	497627526	0.00098293	0.06752
RFWH	AX-108900487	3B	499378129	0.00066847	0.07134
RFWH	AX-109944863	3B	499474768	0.00085249	0.06888
RFWH	AX-111125878	3B	500321893	0.00077482	0.06985
RFWH	AX-109355238	3B	503528440	8.0345e-05	0.09303
RFWH	AX-109870247	5A	513968611	0.00066772	0.07135
RFWH	AX-111618181	5A	518399754	0.00087283	0.06864
RFWH	AX-108775183	3A	518483817	0.00027518	0.08037
RFWH	AX-111177456	3B	519766995	0.00031551	0.07897
RFWH	AX-109529149	3B	521790820	0.00069097	0.07101
RFWH	AX-111109395	3B	521902883	6.3897e-05	0.09801
RFWH	AX-111074342	3B	522026669	9.3648e-05	0.09145
RFWH	AX-108886413	3B	522875366	0.00027056	0.08054
RFWH	AX-109875013	3B	523299540	0.00035855	0.07885
RFWH	AX-108774096	3B	523715996	0.00072168	0.07056
RFWH	AX-110674067	3B	523797691	0.00011797	0.08906
RFWH	AX-110539298	3B	524247155	3.7488e-07	0.15012
RFWH	AX-109073338	3B	524341805	0.00017484	0.08504
RFWH	AX-109448590	3B	524532846	0.00094126	0.07047
RFWH	AX-110461038	5D	545691794	0.00052729	0.07454
RFWH	AX-110386330	4A	568310019	0.00084056	0.06902
RFWH	AX-111491720	4A	568872627	0.00090856	0.06824
RFWH	AX-111135351	4A	569497105	0.00093564	0.06879
RFWH	AX-109345287	4A	569866982	0.00090856	0.06824
RFWH	AX-109517098	3B	570207254	0.00036811	0.0774
RFWH	AX-111247327	4A	570258105	0.00090856	0.06824
RFWH	AX-110920240	5A	584133702	0.00013647	0.08756
RFWH	AX-111011118	6A	604440361	0.00019854	0.08468
RFWH	AX-108970603	4A	615937254	0.00060873	0.07229
RFWH	AX-111000678	4A	616427906	0.00056639	0.07302
RFWH	AX-111554046	7D	194699994	0.00014654	0.08853
RFWH	AX-110456494	7D	572798505	6.2627e-05	0.09561
RFWH	AX-108911340	7D	610528787	0.000877	0.06859
RFWH	AX-111003319	5B	654747997	0.00059768	0.07247
RFWH	AX-111116821	5B	655006775	0.0005334	0.0738
RFWH	AX-110471255	1B	666575193	0.00076467	0.07011
RFWH	AX-108809359	5A	680048166	0.00021072	0.08333
RFWH	AX-109585386	5B	683398069	1.7815e-05	0.1088
RFWH	AX-109462479	3B	686380203	0.00027006	0.08309
RFWH	AX-110933729	3B	732794365	0.00060236	0.07437
RFWH	AX-109282599	4A	738958821	0.00022497	0.08258
RFWH	AX-94559451	2B	780677715	0.00031284	0.07961
RFWL	AX-109431101	2D	2598501	0.00093248	0.0695
RFWL	AX-110483957	7A	20477304	0.0003551	0.08086
RFWL	AX-109361752	7A	22928681	0.00048036	0.07637
RFWL	AX-110481731	7A	23079649	0.00048771	0.07621
RFWL	AX-110940446	7A	23344643	0.00037217	0.07906
RFWL	AX-109925267	4B	43213910	0.00089574	0.06992
RFWL	AX-109915068	6D	46871301	0.00071252	0.07228
RFWL	AX-110002732	6D	54073201	0.00013447	0.08968
RFWL	AX-111125001	4A	107797877	0.00062088	0.07416
RFWL	AX-111140183	3B	271226253	0.00043458	0.07741
RFWL	AX-111493035	6A	293145390	0.00037497	0.07895
RFWL	AX-110898750	5D	408438065	0.00059553	0.07414
RFWL	AX-110739522	5A	513871610	0.0004487	0.07723
RFWL	AX-108909064	5A	513920119	0.00028031	0.08224
RFWL	AX-109337050	5A	514005305	0.00039785	0.07833
RFWL	AX-109964501	5A	514153610	0.00040378	0.07818
RFWL	AX-108806459	5A	514265095	4.8125e-05	0.10059
RFWL	AX-108928438	5A	514288158	0.00087709	0.07013
RFWL	AX-110411474	5A	514302395	0.00063022	0.07355
RFWL	AX-110712043	5A	515527417	0.00020251	0.08538
RFWL	AX-110607963	5A	515775754	0.00059599	0.07602
RFWL	AX-110993276	5A	516642589	0.00043246	0.07746
RFWL	AX-111603376	5A	516808961	0.00027784	0.08207
RFWL	AX-110499413	5A	517741005	0.00041819	0.07781
RFWL	AX-111464657	5A	517868926	0.00041819	0.07781
RFWL	AX-109966482	5A	518300987	0.00030524	0.08109
RFWL	AX-111520415	5A	520464329	0.00015703	0.09002
RFWL	AX-111521500	1B	580216347	0.00013056	0.09192
RFWL	AX-110405792	3B	713250050	0.0005016	0.07746
RFWL	AX-111191528	3B	731262903	0.00013163	0.08991
RFWL	AX-109830120	3B	733652421	0.00034257	0.07989
RFWL	AX-108729434	3B	733880316	0.00072404	0.07212
RFWL	AX-110420045	3B	734091603	0.00023326	0.0839
RFWL	AX-110127873	3B	734485466	0.00052998	0.07574
RFWN	AX-109158511	4D	1807837	0.0008509	0.07152
RFWN	AX-109815802	4B	10916305	0.00041019	0.07872
RFWN	AX-109327593	4B	10944746	0.00037824	0.07957
RFWN	AX-110830189	1D	37948440	0.00049416	0.07677
RFWN	AX-111762061	6B	192866992	0.00035165	0.08034
RFWN	AX-111028996	1B	366927312	0.00026405	0.08529
RFWN	AX-108962141	1B	403813869	0.0003921	0.07968
RFWN	AX-111910451	6D	465418480	0.00086294	0.07094
RFWN	AX-110945323	5A	482678459	0.00089248	0.07059
RFWN	AX-110672517	5A	484101066	0.00016374	0.08933
RFWN	AX-111453407	5A	484556945	0.00088329	0.07094
RFWN	AX-110965166	5A	485209391	0.0002154	0.08551
RFWN	AX-110474644	6A	499209707	0.00085027	0.07255
RFWN	AX-109966482	5A	518300987	0.00059946	0.07475
RFWN	AX-110525221	5A	528096918	0.00073182	0.07266
RFWN	AX-111721212	5D	553775393	0.00025451	0.08375
RFWN	AX-109451102	5D	554612581	0.00093529	0.07117
RFWN	AX-111247484	6B	607882137	0.00054837	0.07586
RFWN	AX-110001799	7B	638441278	0.00069933	0.0732
RFWN	AX-109371329	7B	638671778	0.00028256	0.08418
RFWN	AX-109915843	7B	638864786	0.00037242	0.08101
RFWN	AX-111142990	2B	731473970	0.00020343	0.08611
RLH	AX-109404355	1A	373201260	0.00088608	0.06935
RLH	AX-111548801	1B	666062250	0.00055309	0.07418
RLH	AX-110990078	1B	666089546	0.0002053	0.08441
RLH	AX-110471255	1B	666575193	5.9978e-05	0.09799
RLH	AX-89696347	2D	647533340	0.00055314	0.07418
RLH	AX-110481242	4A	650054091	0.00064761	0.07289
RLH	AX-89765968	4D	440257810	0.00052304	0.07475
RLH	AX-109411245	5D	58260415	0.00063851	0.07271
RLH	AX-110064487	7A	611324500	0.0003758	0.07816
RLH	AX-110939373	7B	525884266	0.00077062	0.07079
RLN	AX-109508833	1B	485745410	0.00075713	0.0713
RLN	AX-111142990	2B	731473970	0.00023886	0.08316
RLN	AX-109570221	2D	590069944	0.0006515	0.07277
RLN	AX-110081557	3A	19558146	0.00058509	0.07388
RLN	AX-110080833	4B	657375421	0.00033335	0.07988
RLN	AX-94577088	4B	657467120	0.00065677	0.07269
RLN	AX-94781835	4D	62878481	0.00089986	0.07031
RLN	AX-109912332	5D	253652957	0.00062077	0.07327
RLN	AX-109838417	6D	462546825	0.00030838	0.06445
RLN	AX-94483986	6D	462844254	0.00057928	0.05877
RLN	AX-111091884	6D	463546416	0.00026974	0.08218
RLN	AX-109538333	7B	726139450	0.00087121	0.06979
RLN	AX-111700196	7B	726854286	0.00012552	0.09344
RLN	AX-110909302	7B	730228610	0.00086779	0.06983
RLN	AX-109394203	7D	627346275	2.2713e-05	0.11162
RLN	AX-110015594	7D	627444961	1.1039e-05	0.1164
RLN	AX-109440048	7D	628133217	7.3241e-06	0.12006
RSRH	AX-109880655	7B	1754184	0.00075332	0.07179
RSRH	AX-110400439	4D	10379910	0.00074009	0.07182
RSRH	AX-110989363	1D	13507567	3.1418e-09	0.20776
RSRH	AX-111641369	4B	13904373	0.00019328	0.08571
RSRH	AX-110542052	4B	14402808	4.9655e-08	0.17756
RSRH	AX-111692654	1D	14668435	0.00021226	0.08478
RSRH	AX-109321591	1D	14692615	0.00014651	0.08862
RSRH	AX-109391268	4B	15639163	0.00019776	0.08547
RSRH	AX-110428871	4B	16084872	4.024e-06	0.12718
RSRH	AX-111075819	4B	16086876	7.098e-06	0.12087
RSRH	AX-110470906	5A	18640683	3.9315e-09	0.20514
RSRH	AX-111580908	5A	19662321	0.00010618	0.09207
RSRH	AX-110448600	4B	19989111	9.7178e-05	0.09376
RSRH	AX-111152694	7A	27461872	3.0798e-09	0.2221
RSRH	AX-110469352	7A	27486683	0.00072671	0.07195
RSRH	AX-109818924	2B	27630707	6.1184e-05	0.09795
RSRH	AX-109313511	7A	27685009	1.618e-07	0.16256
RSRH	AX-110577173	7A	27878923	1.1528e-05	0.11563
RSRH	AX-108983036	2B	27895618	6.0241e-05	0.09798
RSRH	AX-110038911	2B	28368052	9.1699e-05	0.09361
RSRH	AX-109849364	2B	28996256	0.00068481	0.0726
RSRH	AX-108835134	2B	31118199	0.0007798	0.07132
RSRH	AX-111549750	7A	32633549	0.00071257	0.07215
RSRH	AX-108748699	1A	33067263	0.00058595	0.07417
RSRH	AX-110007541	1A	33069829	0.00083022	0.07058
RSRH	AX-111580123	1A	33293594	0.00068394	0.07258
RSRH	AX-110500599	1A	40960876	9.8864e-05	0.09677
RSRH	AX-108888974	1A	41076253	4.471e-05	0.10129
RSRH	AX-111139240	1A	41150360	4.586e-05	0.10087
RSRH	AX-110397824	1A	41161666	7.0222e-05	0.09636
RSRH	AX-109905095	1A	41322511	6.2118e-05	0.09846
RSRH	AX-110402352	1A	41375014	3.5926e-05	0.10423
RSRH	AX-108844296	1A	41539216	7.6303e-05	0.10393
RSRH	AX-109300303	2A	62266889	4.4365e-05	0.10123
RSRH	AX-109507546	5B	63560983	2.6149e-06	0.13222
RSRH	AX-109048125	5B	64223334	5.4744e-05	0.09981
RSRH	AX-110947814	3B	68662153	0.00094896	0.0692
RSRH	AX-110908996	5B	70606547	1.107e-05	0.11607
RSRH	AX-94567834	1D	79054647	0.00032468	0.08174
RSRH	AX-111011197	2A	91400331	0.00085272	0.0703
RSRH	AX-110493070	2A	92454595	0.00028868	0.08161
RSRH	AX-111666193	2A	92626692	0.00027279	0.08233
RSRH	AX-109853810	2A	93408446	0.00028967	0.0816
RSRH	AX-110627106	2A	94159265	0.00023325	0.08375
RSRH	AX-109822862	6B	94486278	0.00046727	0.0767
RSRH	AX-110450612	2A	95025157	0.00058352	0.07607
RSRH	AX-109601926	3B	95407387	0.00023579	0.08364
RSRH	AX-109033378	6B	95558151	0.00035791	0.07929
RSRH	AX-111491564	6B	95723518	0.00035791	0.07929
RSRH	AX-110438187	2A	95830292	0.00027379	0.08208
RSRH	AX-110487006	6B	96399588	0.00067927	0.07265
RSRH	AX-109484676	2A	99789182	0.00023112	0.08387
RSRH	AX-109051357	2B	100258157	5.8369e-05	0.09847
RSRH	AX-109943229	2A	101529870	0.00027765	0.08193
RSRH	AX-110108660	2A	102404292	8.8767e-05	0.09389
RSRH	AX-108768059	2A	102561753	0.00081942	0.07071
RSRH	AX-94467930	1D	102773947	0.00086233	0.07087
RSRH	AX-108964849	2A	103125659	0.00024357	0.08341
RSRH	AX-108880421	2A	103141052	0.001	0.06891
RSRH	AX-108910006	2A	103810925	0.00024228	0.08335
RSRH	AX-110516001	2A	104298168	0.00010954	0.09167
RSRH	AX-110431759	2A	105044730	0.00017442	0.08679
RSRH	AX-110526044	2A	105479971	0.00069058	0.07248
RSRH	AX-110045094	2A	105508475	0.00061666	0.07374
RSRH	AX-108927217	2A	106093750	0.00063801	0.07364
RSRH	AX-109399923	2A	106115655	0.00065085	0.07338
RSRH	AX-108978733	2A	106651324	0.00062442	0.07352
RSRH	AX-111194258	5B	106961886	0.00036363	0.07912
RSRH	AX-108918440	2A	107181872	0.00068733	0.0726
RSRH	AX-111018597	2A	107311215	0.00066081	0.07293
RSRH	AX-109374174	2A	108260201	7.5246e-06	0.12117
RSRH	AX-110042217	2A	111421060	6.1905e-06	0.12235
RSRH	AX-108732339	6B	113573526	0.00056599	0.07483
RSRH	AX-109421706	6B	114056320	0.00033448	0.07999
RSRH	AX-110624525	5B	115411485	0.00033606	0.07994
RSRH	AX-111547712	2A	115436625	0.00062442	0.07352
RSRH	AX-110651741	2A	115714343	0.00061627	0.07365
RSRH	AX-109037537	6D	126842788	0.00067716	0.07385
RSRH	AX-110626120	7B	141853858	0.00018059	0.08642
RSRH	AX-111138800	5B	149798202	0.0004335	0.07829
RSRH	AX-109426058	5B	151848218	0.0003038	0.08108
RSRH	AX-109578598	5B	224375288	0.00063441	0.07335
RSRH	AX-110568815	5B	228435622	0.00056074	0.07463
RSRH	AX-109109034	5B	228486621	0.0005407	0.07501
RSRH	AX-110639732	5B	228815862	0.00090124	0.06973
RSRH	AX-94681973	1B	230948237	0.00038276	0.08081
RSRH	AX-111063169	5B	231351161	0.00056074	0.07463
RSRH	AX-108821951	5B	239312186	0.00039924	0.07823
RSRH	AX-111451165	5B	244757341	0.00084253	0.07042
RSRH	AX-94454822	1D	247513598	2.243e-05	0.11027
RSRH	AX-111525505	1B	249238373	5.6328e-09	0.20095
RSRH	AX-108822210	1B	249857827	0.00060364	0.07426
RSRH	AX-110365753	1B	251531124	7.3096e-05	0.09594
RSRH	AX-108972329	1B	298437645	0.00085615	0.07026
RSRH	AX-110998966	1A	303024845	0.00097195	0.06895
RSRH	AX-109474301	1A	303533496	0.00027354	0.08209
RSRH	AX-111051858	1B	313079801	0.00045174	0.07687
RSRH	AX-110362294	1B	317448975	0.00013508	0.08947
RSRH	AX-111216644	1B	317460132	1.8385e-05	0.11062
RSRH	AX-89352854	1B	317483016	9.2529e-05	0.09345
RSRH	AX-109372181	1B	322425833	5.9779e-09	0.20026
RSRH	AX-110408487	1B	322760231	7.968e-05	0.09575
RSRH	AX-108798723	1B	322940238	7.3947e-05	0.09581
RSRH	AX-110020631	1B	322947409	4.1532e-05	0.10197
RSRH	AX-108806701	1B	323312118	5.0654e-05	0.09982
RSRH	AX-108850301	1B	323946791	1.7635e-09	0.21453
RSRH	AX-109862469	1B	324351688	6.8172e-05	0.09667
RSRH	AX-109408556	1B	324494519	0.00050146	0.07579
RSRH	AX-108888592	1B	325155370	4.9036e-07	0.15017
RSRH	AX-110926323	1B	325256496	3.2743e-05	0.1048
RSRH	AX-110010230	1B	325283703	4.7598e-05	0.10048
RSRH	AX-110364601	1B	342646210	0.00044189	0.07722
RSRH	AX-108965368	1B	363723945	0.00020732	0.08577
RSRH	AX-109312262	1A	369324895	0.00051011	0.07614
RSRH	AX-111525369	7B	385919888	0.00061139	0.07373
RSRH	AX-108903381	1B	415260486	0.00018128	0.08638
RSRH	AX-109888874	5D	423966771	0.00048056	0.07722
RSRH	AX-109846542	1B	432328837	4.2729e-09	0.20438
RSRH	AX-110483236	5D	434752688	0.00049974	0.07582
RSRH	AX-109938535	5D	434758324	0.00078484	0.07162
RSRH	AX-110687238	1B	448131731	0.00017117	0.08699
RSRH	AX-108964423	1B	450603208	1.8246e-05	0.1118
RSRH	AX-94875830	6D	452632659	0.00088932	0.07016
RSRH	AX-108852818	1B	456291396	3.9844e-05	0.10237
RSRH	AX-108854151	5A	461584317	0.00047292	0.07639
RSRH	AX-110564663	1A	463453980	0.00045343	0.07683
RSRH	AX-111506476	5A	469062182	1.5139e-05	0.11956
RSRH	AX-111610150	1B	471747666	0.00026146	0.08261
RSRH	AX-111099988	1B	473104198	0.00021132	0.08478
RSRH	AX-108805110	1B	473491246	5.998e-09	0.20022
RSRH	AX-111458817	1B	474256661	9.1376e-06	0.1185
RSRH	AX-108808786	5A	476398226	0.00053203	0.07517
RSRH	AX-111109251	1D	484017880	1.2342e-05	0.11585
RSRH	AX-110073901	1B	488207210	6.7321e-05	0.09687
RSRH	AX-110514958	1B	488211547	7.4731e-05	0.09644
RSRH	AX-110474389	7D	18947077	4.7753e-05	0.1005
RSRH	AX-111180631	1B	503516645	0.00013528	0.08977
RSRH	AX-111181295	7B	517900838	0.00089813	0.07163
RSRH	AX-110632081	7B	518920436	0.00036606	0.07905
RSRH	AX-109294610	7B	519786031	0.00024112	0.0834
RSRH	AX-110989207	7B	519904496	0.00089684	0.0698
RSRH	AX-109425297	1A	523030643	0.00063426	0.07337
RSRH	AX-109026315	7B	534045733	0.00021261	0.08472
RSRH	AX-108955868	2B	564238060	0.00033812	0.08004
RSRH	AX-110651235	1B	566841873	0.001	0.06866
RSRH	AX-109305456	5A	568917330	5.4247e-06	0.12461
RSRH	AX-89403396	7D	124291890	3.5204e-05	0.10369
RSRH	AX-109324666	1B	580428042	0.00091076	0.06962
RSRH	AX-108909298	7D	453621279	0.00069804	0.07236
RSRH	AX-111151810	5B	593067106	0.00079905	0.07431
RSRH	AX-108762143	5B	594304810	0.00079905	0.07431
RSRH	AX-108880962	5B	597286763	0.00050985	0.07561
RSRH	AX-111490690	2B	601190889	0.00092763	0.06952
RSRH	AX-109160430	7D	455060262	0.00065264	0.07306
RSRH	AX-109791875	7D	458204666	0.00097282	0.06925
RSRH	AX-94382077	7D	489903050	0.00025158	0.08361
RSRH	AX-110517011	4A	616240584	3.9281e-05	0.10252
RSRH	AX-111108822	3A	711648336	0.00031103	0.08075
RSRH	AX-109988278	3A	713624177	7.3503e-06	0.12279
RSRH	AX-109360546	3A	723588664	0.00086979	0.07052
RSRH	AX-110529210	7A	733577428	0.00019087	0.08584
RSRH	AX-111065811	2B	778251991	0.0004909	0.07601
RSRL	AX-89333265	3A	23647502	0.0007	0.07325
RSRL	AX-110634761	3A	23656641	0.00044133	0.0798
RSRL	AX-111623715	6D	24456602	8.0725e-05	0.09545
RSRL	AX-94762593	6D	25636611	0.00011563	0.09191
RSRL	AX-111484141	1A	33208745	0.00016102	0.08812
RSRL	AX-111604322	6B	114521291	0.00042738	0.06194
RSRL	AX-111622512	6B	115085963	0.00048	0.06082
RSRL	AX-109938252	6B	116097363	0.00048	0.06082
RSRL	AX-111516223	6B	116416981	0.00048	0.06082
RSRL	AX-111004330	6B	116461196	0.00048	0.06082
RSRL	AX-94875830	6D	452632659	0.00016358	0.08886
RSRL	AX-111183687	6D	460735703	0.0008334	0.07093
RSRL	AX-108962306	6D	460748416	0.00096523	0.06941
RSRL	AX-110910949	6D	460785354	0.00059982	0.07435
RSRL	AX-110119937	6D	460792479	0.00041443	0.07822
RSRL	AX-111516761	7B	610738817	0.00029199	0.08186
RSRL	AX-109894589	7B	611705722	0.00069476	0.07282
RSRL	AX-110983898	2A	641084037	0.00037037	0.07937
RSRL	AX-110127068	5B	670783215	0.00053333	0.07671
RSRN	AX-111670187	6D	16772781	0.00017205	0.08633
RSRN	AX-111277473	6A	17594640	4.6772e-05	0.09997
RSRN	AX-111684944	1A	22558795	0.00055082	0.07679
RSRN	AX-94710443	1A	22597010	0.00088473	0.06944
RSRN	AX-94762593	6D	25636611	0.00043174	0.078
RSRN	AX-110937823	1A	28970943	0.00058889	0.07366
RSRN	AX-109337706	6A	79579383	0.00030142	0.08052
RSRN	AX-109419741	2D	81151128	0.00058138	0.07374
RSRN	AX-86179501	6B	94000089	0.0009738	0.06846
RSRN	AX-109374174	2A	108260201	0.00053314	0.07565
RSRN	AX-110042217	2A	111421060	0.00064391	0.07269
RSRN	AX-111643984	2B	131571788	0.00046877	0.07596
RSRN	AX-94875830	6D	452632659	0.0005041	0.07582
RSRN	AX-108913143	3A	492337413	0.00059832	0.077
RSRN	AX-110451271	1A	536959958	0.00019292	0.08544
RSRN	AX-108880253	1A	537046264	0.00055486	0.07422
RSRN	AX-108768730	1B	564492503	0.00086433	0.06976
RSRN	AX-109827342	5B	661206166	0.00077426	0.07243
SDWH	AX-110150903	4D	220096415	0.00054004	0.07704
SDWH	AX-111509071	1D	464629536	0.00024252	0.08589
SDWH	AX-111256563	5A	582651331	0.00014147	0.0917
SDWL	AX-110212463	4D	3415652	0.00015702	0.09201
SDWL	AX-111642362	4D	3429717	0.00016634	0.09148
SDWL	AX-110487570	4D	3436468	0.00023514	0.08759
SDWL	AX-109011458	4D	3438781	0.00014641	0.09278
SDWL	AX-108900782	2A	15875803	0.00092042	0.07278
SDWL	AX-111638563	2A	16552228	0.00089066	0.07314
SDWL	AX-109326114	1D	21743856	0.00065786	0.0764
SDWL	AX-109455393	3A	38141372	0.00095416	0.07238
SDWL	AX-109340279	1A	40280825	0.00086027	0.0735
SDWL	AX-110016374	1A	40498587	0.00076518	0.07514
SDWL	AX-108815180	1A	40554914	0.00086027	0.0735
SDWL	AX-111051748	5B	44358312	0.00093963	0.07254
SDWL	AX-110537886	1D	46491607	9.3813e-06	0.12381
SDWL	AX-111792583	7B	46916136	0.00097822	0.07211
SDWL	AX-109869065	7B	49175029	0.00062288	0.07729
SDWL	AX-109330266	1D	49433166	0.00023546	0.08803
SDWL	AX-111677352	7B	51969783	0.00074619	0.07503
SDWL	AX-109283360	6A	53204346	0.00095636	0.07235
SDWL	AX-108922086	7B	53248917	0.00098792	0.072
SDWL	AX-108850253	2D	59146136	0.00064428	0.07662
SDWL	AX-111067146	2D	59190533	0.00068898	0.07594
SDWL	AX-111769456	2D	59334582	0.00059684	0.07747
SDWL	AX-111561216	2D	59470696	0.00064465	0.08057
SDWL	AX-111405488	2D	59943039	0.00096062	0.08081
SDWL	AX-110480398	2D	60951276	0.00087537	0.07331
SDWL	AX-108823863	2D	61979535	0.00019201	0.08983
SDWL	AX-110895554	2D	61988366	0.00028438	0.08984
SDWL	AX-108856762	2D	62404512	0.00063468	0.07678
SDWL	AX-110484224	6A	65802693	0.00088821	0.07328
SDWL	AX-110587553	6A	72361387	0.00094128	0.07267
SDWL	AX-111132303	6A	83462066	0.00050625	0.07923
SDWL	AX-111481557	6D	86651424	5.5879e-05	0.10342
SDWL	AX-111604322	6B	114521291	0.00013818	0.0759
SDWL	AX-111054484	6B	115069026	0.00014035	0.09325
SDWL	AX-111622512	6B	115085963	9.6339e-05	0.07959
SDWL	AX-111047031	6B	115295610	0.00046986	0.08004
SDWL	AX-109938252	6B	116097363	9.6339e-05	0.07959
SDWL	AX-111516223	6B	116416981	9.6339e-05	0.07959
SDWL	AX-111004330	6B	116461196	9.6339e-05	0.07959
SDWL	AX-108806771	3B	276720393	0.00042912	0.08234
SDWL	AX-109307631	1B	302750566	2.597e-05	0.11196
SDWL	AX-108862843	6A	309284211	1.9188e-05	0.11535
SDWL	AX-109651481	6A	310569613	0.00057342	0.07798
SDWL	AX-111559248	6A	318296852	3.3497e-05	0.10911
SDWL	AX-110269309	3D	371341801	0.00075116	0.07496
SDWL	AX-111656258	6B	390035003	0.00058595	0.08185
SDWL	AX-111807548	6A	390557495	0.00021509	0.08856
SDWL	AX-108962141	1B	403813869	0.00019581	0.09095
SDWL	AX-109857040	7D	47711832	0.00082503	0.07395
SDWL	AX-109785143	7D	59575788	0.00085562	0.07355
SDWL	AX-109627540	7D	123835396	0.00032791	0.08396
SDWL	AX-110832233	4D	507128999	0.00020191	0.08925
SDWL	AX-108931576	1A	522152681	0.00037079	0.08334
SDWL	AX-111050701	6A	540467189	0.00040677	0.08164
SDWL	AX-111645842	5D	543243515	0.00040396	0.08169
SDWL	AX-109977315	5D	543273718	0.00022847	0.09199
SDWL	AX-109483714	5D	543442180	0.00048862	0.07962
SDWL	AX-109902493	5D	543585637	0.00051124	0.07913
SDWL	AX-109283670	5D	553344000	0.00077166	0.07467
SDWL	AX-111761048	5B	555077933	0.00071649	0.07618
SDWL	AX-95110233	6B	563055841	0.00070708	0.07561
SDWL	AX-111143764	6B	565081309	0.00086687	0.07341
SDWL	AX-108847203	1A	567714120	0.00028468	0.0855
SDWL	AX-111170306	1A	567967912	0.0004045	0.08256
SDWL	AX-111672733	2B	572628142	0.00092764	0.07268
SDWL	AX-110936436	5A	636638920	0.00083433	0.07385
SDWL	AX-89696347	2D	647533340	0.00070509	0.07564
SDWL	AX-111382276	2D	650067895	0.00041033	0.08176
SDWL	AX-111135060	5B	678927391	0.00057403	0.07876
SDWL	AX-109413743	3B	680735249	0.00096681	0.07301
SDWL	AX-111502226	3B	808674178	0.00063413	0.07679
SDWN	AX-109326114	1D	21743856	0.00018759	0.08923
SDWN	AX-109401644	5B	50655258	0.00050057	0.07862
SDWN	AX-111123066	7A	55431597	5.1828e-05	0.10338
SDWN	AX-109325100	6A	61431458	0.00034838	0.08252
SDWN	AX-109376346	6A	61748025	0.0006918	0.07515
SDWN	AX-111762061	6B	192866992	0.00076597	0.07406
SDWN	AX-109407231	6B	366689308	0.00044889	0.08001
SDWN	AX-108962141	1B	403813869	0.00033454	0.08351
SDWN	AX-109382255	6B	497267595	0.00085259	0.07291
SDWN	AX-110832233	4D	507128999	0.00059559	0.07675
SDWN	AX-89596424	3A	513927888	0.00075017	0.07551
SDWN	AX-110525221	5A	528096918	0.00064545	0.07589
SDWN	AX-108847203	1A	567714120	0.00020636	0.08819
SDWN	AX-111170306	1A	567967912	7.5027e-05	0.09989
SDWN	AX-110483224	7B	611776655	0.00092749	0.07201
SDWN	AX-111506964	7B	611896092	0.00079113	0.07372
SDWN	AX-109327847	7B	612256762	0.00047982	0.07908
SDWN	AX-110490694	7B	612331547	0.00045935	0.07956
SDWN	AX-110595073	7B	627636405	0.00059539	0.07676
SDWN	AX-111485326	7B	627697145	0.00069705	0.07507
SDWN	AX-110392069	1B	639638582	0.00020746	0.0882
SDWN	AX-110979003	1B	642429411	0.00081473	0.0734
SDWN	AX-109365636	2B	758808487	0.00092167	0.07252
SFWH	AX-109815802	4B	10916305	0.00023299	0.08673
SFWH	AX-109327593	4B	10944746	0.0004584	0.07943
SFWH	AX-111144631	4B	10971468	0.00088932	0.07234
SFWH	AX-109795669	2D	138366111	0.00035023	0.08233
SFWH	AX-111256563	5A	582651331	5.7796e-05	0.10269
SFWH	AX-110736420	1A	585652280	0.00040753	0.0807
SFWH	AX-108786044	2A	698009743	0.00079695	0.07351
SFWL	AX-111086728	5A	8498716	0.00043057	0.08029
SFWL	AX-110529161	5A	8506804	0.00097142	0.07156
SFWL	AX-110607926	6B	29357151	0.00033472	0.08301
SFWL	AX-108732235	2D	57164306	0.00066894	0.07567
SFWL	AX-108850253	2D	59146136	0.00019492	0.08887
SFWL	AX-111067146	2D	59190533	0.0002591	0.08592
SFWL	AX-110189937	2D	59324909	0.00081581	0.07343
SFWL	AX-111769456	2D	59334582	0.00015317	0.09164
SFWL	AX-111561216	2D	59470696	0.00034858	0.08611
SFWL	AX-111935999	2D	59568799	0.00045483	0.08039
SFWL	AX-111274190	2D	59849840	0.00081956	0.07338
SFWL	AX-111405488	2D	59943039	0.00098599	0.07583
SFWL	AX-109331314	2D	60011290	0.00043573	0.08029
SFWL	AX-110480398	2D	60951276	0.00019471	0.08888
SFWL	AX-108823863	2D	61979535	0.00041902	0.08071
SFWL	AX-110895554	2D	61988366	0.00075561	0.07739
SFWL	AX-108856762	2D	62404512	0.000556	0.07754
SFWL	AX-108795893	7B	71153685	0.00027885	0.08498
SFWL	AX-111481557	6D	86651424	0.00057594	0.07716
SFWL	AX-108862843	6A	309284211	6.6428e-05	0.10062
SFWL	AX-109651481	6A	310569613	0.00030838	0.08415
SFWL	AX-111559248	6A	318296852	0.00071493	0.07484
SFWL	AX-110699549	6A	336667190	0.00064496	0.07595
SFWL	AX-108744786	6A	343279831	0.00094075	0.0719
SFWL	AX-109939150	6A	359452409	0.00042079	0.08054
SFWL	AX-111609358	6A	359826294	0.000359	0.08232
SFWL	AX-110199305	6A	365607534	0.00041733	0.08063
SFWL	AX-111273318	6A	367036061	0.00045994	0.07958
SFWL	AX-110269309	3D	371341801	0.00021244	0.08793
SFWL	AX-109655008	3D	373830494	0.00086235	0.07298
SFWL	AX-109046760	6A	375955477	0.00042079	0.08054
SFWL	AX-111807548	6A	390557495	0.00088976	0.0725
SFWL	AX-109623979	6A	395370525	0.00088987	0.0727
SFWL	AX-169334321	4D	490862310	0.00096063	0.07189
SFWL	AX-111520415	5A	520464329	0.0007254	0.07577
SFWL	AX-109977315	5D	543273718	0.00064211	0.081
SFWL	AX-109283670	5D	553344000	0.00087542	0.07267
SFWL	AX-111761048	5B	555077933	0.00045987	0.08158
SFWL	AX-95111256	3D	555791101	0.00051456	0.07837
SFWL	AX-109446975	5A	607813695	0.00074687	0.07437
SFWL	AX-109406297	5A	608040095	0.0002939	0.08441
SFWL	AX-110513507	5A	608341043	0.00016938	0.09074
SFWL	AX-110121471	6B	630870989	0.00035467	0.08343
SFWL	AX-111135060	5B	678927391	0.00025862	0.08587
SFWL	AX-109325350	2B	767799417	0.00024342	0.08779
SFWN	AX-110458661	4B	10794833	0.00035358	0.08213
SFWN	AX-109815802	4B	10916305	0.0002535	0.08571
SFWN	AX-109327593	4B	10944746	0.0001205	0.09377
SFWN	AX-111144631	4B	10971468	0.00012229	0.09361
SFWN	AX-109326114	1D	21743856	0.00098315	0.07118
SFWN	AX-111337684	3D	42304664	0.00040283	0.08072
SFWN	AX-111123066	7A	55431597	0.00022279	0.08711
SFWN	AX-111648340	4B	60369980	0.00093422	0.07172
SFWN	AX-109325100	6A	61431458	0.00020122	0.08821
SFWN	AX-111557071	4B	62963647	0.00081755	0.07315
SFWN	AX-111576144	5A	62977120	0.00059641	0.07662
SFWN	AX-109999569	4B	63121885	0.00091917	0.07218
SFWN	AX-108821036	4B	64694318	0.00093422	0.07172
SFWN	AX-111177138	4B	66802574	0.00087559	0.07261
SFWN	AX-108767647	4B	67096722	0.00093422	0.07172
SFWN	AX-110482282	4B	69424714	0.00093422	0.07172
SFWN	AX-109649755	7A	75215952	0.00094441	0.07161
SFWN	AX-110144651	2A	87551720	0.00057554	0.07901
SFWN	AX-110362583	2A	87851907	0.00077791	0.07368
SFWN	AX-110058817	2A	91191858	0.00091916	0.0719
SFWN	AX-109315949	2A	99539055	0.00090385	0.07262
SFWN	AX-108891438	2A	100032546	0.00091659	0.07229
SFWN	AX-111013049	2A	100667546	0.00091693	0.07192
SFWN	AX-109467610	2A	100777896	0.00090061	0.07211
SFWN	AX-109624261	7A	113627131	0.00081969	0.07312
SFWN	AX-109393412	2A	120506381	0.00034325	0.08244
SFWN	AX-111470685	2A	134271689	0.00080202	0.07335
SFWN	AX-110671547	2A	142705639	0.00079864	0.0734
SFWN	AX-109941791	2A	143832653	0.00015149	0.09146
SFWN	AX-111155212	2A	144607810	0.00077572	0.07624
SFWN	AX-111054566	2A	144652972	0.00080617	0.0733
SFWN	AX-109000491	6B	147013802	0.00040823	0.08217
SFWN	AX-111762061	6B	192866992	0.00052811	0.07782
SFWN	AX-111526214	4D	310458135	0.00047117	0.07995
SFWN	AX-110362294	1B	317448975	0.00022401	0.08705
SFWN	AX-109408556	1B	324494519	0.00060341	0.07639
SFWN	AX-110926323	1B	325256496	0.00052287	0.078
SFWN	AX-110010230	1B	325283703	0.00032235	0.08312
SFWN	AX-110015801	5A	391825934	0.00098591	0.07115
SFWN	AX-108903381	1B	415260486	0.00062229	0.07606
SFWN	AX-86164084	4D	449729037	0.00060683	0.07637
SFWN	AX-111536018	6A	455699862	0.0007226	0.07472
SFWN	AX-110363739	6A	455822602	0.00049872	0.07904
SFWN	AX-110398381	6A	455940385	0.00057075	0.07699
SFWN	AX-108767470	6A	455991636	0.00055637	0.07726
SFWN	AX-109470150	5A	480271254	0.00073934	0.07445
SFWN	AX-110945323	5A	482678459	0.00044092	0.07975
SFWN	AX-110940138	5A	482946205	0.00080009	0.07338
SFWN	AX-111453407	5A	484556945	0.00069322	0.07632
SFWN	AX-109911851	5A	485360977	0.00079218	0.07348
SFWN	AX-109382255	6B	497267595	0.00084819	0.07275
SFWN	AX-110525221	5A	528096918	0.00023588	0.08649
SFWN	AX-111170306	1A	567967912	0.00039048	0.08122
SFWN	AX-109885005	5B	568919772	0.00095048	0.07154
SFWN	AX-109051790	6B	608849818	0.0004924	0.08182
SFWN	AX-109327847	7B	612256762	0.00084024	0.07285
SFWN	AX-110490694	7B	612331547	0.00077964	0.07365
SFWN	AX-110392069	1B	639638582	0.0001658	0.09034
SFWN	AX-110433155	4A	655430217	0.00024757	0.08597
SFWN	AX-110618966	5B	687161909	0.00014722	0.09159
SFWN	AX-110610509	5B	687712114	0.00014722	0.09159
SFWN	AX-109904634	2A	704173063	0.0005668	0.07778
SFWN	AX-109390851	2A	704504628	0.00031179	0.08475
SFWN	AX-109365636	2B	758808487	0.00045072	0.08002
SLH	AX-111150500	3A	23900501	0.00013864	0.09104
SLH	AX-94550983	1B	47624839	0.00083227	0.07231
SLH	AX-108876381	6A	48627792	0.00080772	0.07231
SLH	AX-108993082	1B	322727022	0.00097114	0.07082
SLH	AX-109627540	7D	123835396	0.00085273	0.07174
SLH	AX-111544717	1B	482691939	0.000962	0.07048
SLH	AX-109275090	3A	733438368	0.00043334	0.07963
SLL	AX-111604707	1A	3226874	0.00050191	0.07882
SLL	AX-111534875	6A	6567653	0.00047224	0.08135
SLL	AX-109913880	4B	10512092	0.0006419	0.0756
SLL	AX-108848169	1A	11816553	0.0009475	0.07145
SLL	AX-89398511	4D	17083872	0.0008617	0.07246
SLL	AX-109326114	1D	21743856	0.00017045	0.08985
SLL	AX-110537886	1D	46491607	7.9124e-06	0.12384
SLL	AX-94550983	1B	47624839	0.001	0.07109
SLL	AX-108876381	6A	48627792	0.00038623	0.08104
SLL	AX-109330266	1D	49433166	0.00036924	0.08178
SLL	AX-111124688	6A	74428617	0.00090899	0.07189
SLL	AX-111481557	6D	86651424	0.0006051	0.07623
SLL	AX-109974355	4A	119690979	0.00069006	0.07483
SLL	AX-109988415	2A	137337142	0.00022566	0.08682
SLL	AX-109627540	7D	123835396	3.2083e-05	0.10808
SLL	AX-109307631	1B	302750566	0.00016761	0.09003
SLL	AX-108862843	6A	309284211	0.00047622	0.07879
SLL	AX-109508228	1B	338002884	0.00078002	0.07352
SLL	AX-111461819	1B	338428325	0.00078002	0.07352
SLL	AX-108962141	1B	403813869	0.0004791	0.07882
SLL	AX-110832233	4D	507128999	0.00016626	0.09012
SLL	AX-111129891	5D	545217066	0.00092067	0.07176
SLL	AX-94989617	5D	546778948	3.5153e-05	0.10741
SLL	AX-108847203	1A	567714120	0.00021662	0.08726
SLL	AX-111170306	1A	567967912	0.00017728	0.08943
SLL	AX-111724995	1A	568008406	0.0001994	0.08815
SLL	AX-95658280	3A	577576266	0.00043681	0.07972
SLL	AX-108726094	1A	578354240	0.00046805	0.07898
SLL	AX-109899365	1A	578518683	0.00048929	0.07914
SLL	AX-110483224	7B	611776655	3.8975e-05	0.10594
SLL	AX-108774819	7B	611805938	0.0002008	0.08808
SLL	AX-111506964	7B	611896092	4.1751e-05	0.10528
SLL	AX-109052370	7B	611900165	9.2383e-05	0.09686
SLL	AX-111609105	7B	611944380	0.0002781	0.08457
SLL	AX-109327847	7B	612256762	0.00038889	0.08096
SLL	AX-110490694	7B	612331547	0.0004053	0.08059
SLL	AX-110595073	7B	627636405	0.00064608	0.07553
SLL	AX-111135060	5B	678927391	0.00071235	0.0745
SLL	AX-109824049	7A	717036233	0.00096715	0.07123
SLN	AX-109913880	4B	10512092	0.00048082	0.07773
SLN	AX-111467805	6A	13128223	0.00088656	0.0716
SLN	AX-89398511	4D	17083872	5.7916e-05	0.10035
SLN	AX-108876381	6A	48627792	0.00015311	0.0899
SLN	AX-111723433	5D	65767361	0.00033931	0.08142
SLN	AX-111124688	6A	74428617	0.00063674	0.07476
SLN	AX-110438187	2A	95830292	0.00098264	0.0702
SLN	AX-109988415	2A	137337142	0.00019997	0.08705
SLN	AX-110832233	4D	507128999	0.00012334	0.09222
SLN	AX-108847203	1A	567714120	0.00086213	0.07157
SLN	AX-111170306	1A	567967912	0.00052766	0.07675
SLN	AX-111724995	1A	568008406	0.00032115	0.08201
SLN	AX-110483224	7B	611776655	0.00029578	0.08288
SLN	AX-108774819	7B	611805938	0.00064543	0.07462
SLN	AX-111506964	7B	611896092	0.00027589	0.08365
SLN	AX-109052370	7B	611900165	0.00043547	0.07887
SLN	AX-111609105	7B	611944380	0.00059103	0.07555
SLN	AX-109327847	7B	612256762	0.00066372	0.07432
SLN	AX-110490694	7B	612331547	0.00068353	0.07404
TDWH	AX-109327593	4B	10944746	0.00064766	0.07577
TDWH	AX-110557220	1D	14714970	0.00087065	0.07374
TDWH	AX-111371086	1D	15602580	0.00086021	0.07273
TDWH	AX-109832828	1D	15639693	0.00085785	0.07276
TDWH	AX-109362705	1D	18195616	0.0003195	0.08339
TDWH	AX-110671124	3A	18834476	0.00083737	0.07302
TDWH	AX-110982869	5A	19654675	0.00030808	0.08379
TDWH	AX-111051748	5B	44358312	0.00061494	0.07632
TDWH	AX-111460654	1A	45104524	0.00030107	0.08403
TDWH	AX-89518540	6B	53636781	0.00083915	0.073
TDWH	AX-111123066	7A	55431597	3.9536e-05	0.10638
TDWH	AX-110011761	7A	56144365	0.00039746	0.08115
TDWH	AX-111405488	2D	59943039	0.00048202	0.08187
TDWH	AX-111596068	5B	60854216	0.00052967	0.07792
TDWH	AX-109325100	6A	61431458	5.547e-05	0.10241
TDWH	AX-109375352	7B	100091538	5.2198e-05	0.10558
TDWH	AX-111342539	2D	100544989	0.00015752	0.09101
TDWH	AX-109624261	7A	113627131	0.00083209	0.07309
TDWH	AX-109619852	7D	359126684	0.0005989	0.0766
TDWH	AX-110987247	4A	129306867	0.00034047	0.08267
TDWH	AX-110360587	4A	130451083	0.0003469	0.08258
TDWH	AX-109795669	2D	138366111	0.00064692	0.07578
TDWH	AX-109316026	2D	138751249	0.000472	0.07916
TDWH	AX-111735910	2B	144434018	0.00060765	0.07666
TDWH	AX-89433121	1B	167111039	0.00040389	0.08083
TDWH	AX-108929781	6B	190688293	0.00068024	0.07524
TDWH	AX-111762061	6B	192866992	0.00039272	0.08114
TDWH	AX-111605442	2D	220630228	0.00014963	0.0934
TDWH	AX-109578598	5B	224375288	0.00063747	0.07594
TDWH	AX-110411338	7A	233642819	0.00053904	0.07773
TDWH	AX-109581524	5B	250568458	9.5165e-05	0.0965
TDWH	AX-109925088	2D	250770132	0.00019186	0.08887
TDWH	AX-109972042	6B	256859968	0.00036389	0.08196
TDWH	AX-111526214	4D	310458135	0.00069459	0.07514
TDWH	AX-109651481	6A	310569613	0.00046329	0.07941
TDWH	AX-94908149	1D	341477044	0.00094202	0.07176
TDWH	AX-111028996	1B	366927312	0.00073889	0.07616
TDWH	AX-109038149	1B	372382404	0.00030497	0.08408
TDWH	AX-111695833	1B	374522868	0.0008267	0.07316
TDWH	AX-108962141	1B	403813869	0.00015565	0.09202
TDWH	AX-108909230	1A	407357311	0.00088956	0.07237
TDWH	AX-111161220	1B	414806318	0.0002764	0.08496
TDWH	AX-109621732	2B	456322107	0.00033589	0.08282
TDWH	AX-111575379	2B	461886409	0.00030623	0.08382
TDWH	AX-111085909	1D	462491566	0.00033293	0.08307
TDWH	AX-111509071	1D	464629536	0.00043122	0.08155
TDWH	AX-110532317	5B	486895975	0.00026625	0.08533
TDWH	AX-110832233	4D	507128999	7.2216e-05	0.09952
TDWH	AX-108871687	6B	553420734	0.00038135	0.08145
TDWH	AX-111672733	2B	572628142	0.00022537	0.08713
TDWH	AX-108969311	2B	574043755	0.00017232	0.09004
TDWH	AX-110488387	1A	585602072	0.00054325	0.07798
TDWH	AX-108733686	2D	608539698	0.0006677	0.07544
TDWH	AX-110978430	6A	611397424	0.00093428	0.07384
TDWH	AX-110392069	1B	639638582	0.00067818	0.0753
TDWH	AX-110672429	2A	641597655	0.00085071	0.07285
TDWH	AX-109360521	1B	641626793	0.00095756	0.07159
TDWH	AX-108814041	1B	641691502	0.00040417	0.08097
TDWH	AX-108756025	4B	657293294	0.00044803	0.07976
TDWH	AX-108786044	2A	698009743	0.00010688	0.09523
TDWH	AX-109365636	2B	758808487	0.00015664	0.09125
TDWH	AX-108796024	2B	767386995	0.00078283	0.0738
TDWH	AX-111736726	2A	773199108	0.00012332	0.09582
TDWH	AX-94559451	2B	780677715	0.00026745	0.08562
TDWL	AX-110212463	4D	3415652	0.00010084	0.09598
TDWL	AX-111642362	4D	3429717	0.00029198	0.08452
TDWL	AX-110487570	4D	3436468	0.00039099	0.08128
TDWL	AX-109011458	4D	3438781	0.00024087	0.08652
TDWL	AX-111691069	3A	7159254	0.00040245	0.08097
TDWL	AX-108900782	2A	15875803	0.00037317	0.0818
TDWL	AX-111638563	2A	16552228	0.00032387	0.08341
TDWL	AX-110483957	7A	20477304	0.00011144	0.09562
TDWL	AX-109361752	7A	22928681	0.00064271	0.07594
TDWL	AX-110481731	7A	23079649	0.00037286	0.0818
TDWL	AX-110607926	6B	29357151	0.00028222	0.0848
TDWL	AX-109973111	6B	33712354	0.00097098	0.07153
TDWL	AX-109070005	3A	36846949	0.00040859	0.08081
TDWL	AX-109455393	3A	38141372	0.00097962	0.07143
TDWL	AX-109340279	1A	40280825	0.00023901	0.0866
TDWL	AX-110016374	1A	40498587	0.00022237	0.08763
TDWL	AX-108815180	1A	40554914	0.00023901	0.0866
TDWL	AX-111051748	5B	44358312	0.00024592	0.08629
TDWL	AX-110537886	1D	46491607	1.9823e-05	0.1143
TDWL	AX-109869065	7B	49175029	0.00040147	0.08132
TDWL	AX-111009411	7B	50243021	0.00093937	0.07238
TDWL	AX-111677352	7B	51969783	0.00069956	0.07503
TDWL	AX-94684858	6D	52819995	0.00057058	0.07746
TDWL	AX-109283360	6A	53204346	0.00028969	0.08452
TDWL	AX-108922086	7B	53248917	0.00072515	0.07465
TDWL	AX-109422066	6A	54367695	0.00053978	0.08047
TDWL	AX-108850253	2D	59146136	0.00043747	0.08007
TDWL	AX-111067146	2D	59190533	0.00045597	0.07965
TDWL	AX-111769456	2D	59334582	0.00035372	0.08249
TDWL	AX-111561216	2D	59470696	0.00052308	0.08331
TDWL	AX-111405488	2D	59943039	0.00068729	0.08242
TDWL	AX-109331314	2D	60011290	0.00088251	0.07284
TDWL	AX-110480398	2D	60951276	0.00055618	0.07749
TDWL	AX-108823863	2D	61979535	0.00026576	0.08558
TDWL	AX-110895554	2D	61988366	0.00033821	0.0884
TDWL	AX-108856762	2D	62404512	0.00021746	0.08762
TDWL	AX-110430362	6A	62809360	0.00054066	0.07826
TDWL	AX-110484224	6A	65802693	0.00037044	0.08208
TDWL	AX-110365141	6A	66296296	0.00060144	0.07668
TDWL	AX-110587553	6A	72361387	0.00039497	0.08136
TDWL	AX-111034568	6A	75156794	0.0004506	0.07976
TDWL	AX-110944922	6A	75164240	0.00044885	0.0798
TDWL	AX-111132303	6A	83462066	0.00035893	0.08221
TDWL	AX-111481557	6D	86651424	6.979e-05	0.10001
TDWL	AX-109375352	7B	100091538	0.0002738	0.08623
TDWL	AX-109857070	6B	106473195	0.0004378	0.08007
TDWL	AX-111604322	6B	114521291	0.00033274	0.06637
TDWL	AX-111054484	6B	115069026	0.00034228	0.08272
TDWL	AX-111622512	6B	115085963	0.00023115	0.07001
TDWL	AX-109938252	6B	116097363	0.00023115	0.07001
TDWL	AX-111516223	6B	116416981	0.00023115	0.07001
TDWL	AX-111004330	6B	116461196	0.00023115	0.07001
TDWL	AX-109857040	7D	47711832	0.00031307	0.08368
TDWL	AX-109785143	7D	59575788	0.00045595	0.07963
TDWL	AX-109627540	7D	123835396	0.00071281	0.07483
TDWL	AX-110987247	4A	129306867	0.00076932	0.07402
TDWL	AX-110360587	4A	130451083	0.00078305	0.07394
TDWL	AX-111244930	6A	225602804	0.00047871	0.0791
TDWL	AX-111140183	3B	271226253	0.00083343	0.07316
TDWL	AX-108806771	3B	276720393	0.00018155	0.0911
TDWL	AX-108802662	6A	286036837	0.00085899	0.07369
TDWL	AX-111493035	6A	293145390	0.00059416	0.07678
TDWL	AX-109307631	1B	302750566	3.8778e-05	0.10647
TDWL	AX-108862843	6A	309284211	1.2197e-05	0.11931
TDWL	AX-109651481	6A	310569613	0.00010909	0.09538
TDWL	AX-111559248	6A	318296852	3.8408e-05	0.10658
TDWL	AX-108927864	1A	333877977	0.00079752	0.07363
TDWL	AX-108744786	6A	343279831	0.00062722	0.0762
TDWL	AX-109939150	6A	359452409	0.00064306	0.07594
TDWL	AX-111609358	6A	359826294	0.00059293	0.0769
TDWL	AX-111524617	1B	364328609	0.00047596	0.07988
TDWL	AX-111631219	1B	365386508	0.00074346	0.07438
TDWL	AX-110199305	6A	365607534	0.00047294	0.07924
TDWL	AX-111028996	1B	366927312	0.00046547	0.08095
TDWL	AX-111273318	6A	367036061	0.00077528	0.07393
TDWL	AX-110269309	3D	371341801	0.00064142	0.07596
TDWL	AX-109038149	1B	372382404	0.00063534	0.07659
TDWL	AX-110010609	1B	372709815	0.00065463	0.07574
TDWL	AX-108737478	1B	375098459	0.00095056	0.07175
TDWL	AX-109046760	6A	375955477	0.00064306	0.07594
TDWL	AX-110523444	1B	380887275	0.00092248	0.07207
TDWL	AX-111656258	6B	390035003	0.00055578	0.08092
TDWL	AX-111807548	6A	390557495	0.00016001	0.09095
TDWL	AX-109623979	6A	395370525	0.00056608	0.0774
TDWL	AX-108962141	1B	403813869	0.00012772	0.0943
TDWL	AX-109308833	6A	411095177	0.00089432	0.07243
TDWL	AX-111558975	6A	415196479	0.00089432	0.07243
TDWL	AX-110009875	6A	416601107	0.00068074	0.07533
TDWL	AX-86167031	6A	420092601	0.0008879	0.07248
TDWL	AX-94389455	6A	421773224	0.00099594	0.07126
TDWL	AX-109472178	6A	431267092	0.00038397	0.08184
TDWL	AX-109621732	2B	456322107	0.00082162	0.07331
TDWL	AX-111575379	2B	461886409	0.00082338	0.07329
TDWL	AX-110832233	4D	507128999	3.1631e-05	0.10872
TDWL	AX-108931576	1A	522152681	0.00017102	0.09113
TDWL	AX-109450963	1A	537062312	0.00093725	0.07285
TDWL	AX-111050701	6A	540467189	0.00027966	0.08494
TDWL	AX-110633778	5D	543228846	0.0007692	0.07402
TDWL	AX-111645842	5D	543243515	0.00022929	0.08705
TDWL	AX-109977315	5D	543273718	0.00018804	0.09561
TDWL	AX-109483714	5D	543442180	0.00014882	0.09174
TDWL	AX-109902493	5D	543585637	0.00015678	0.09118
TDWL	AX-111129891	5D	545217066	0.00055925	0.07743
TDWL	AX-111059897	5D	545399165	0.00047989	0.0812
TDWL	AX-109940890	5D	545525704	0.00057123	0.07721
TDWL	AX-109283670	5D	553344000	0.00027103	0.08524
TDWL	AX-108871687	6B	553420734	0.00039854	0.08108
TDWL	AX-111721212	5D	553775393	0.0004303	0.08025
TDWL	AX-111282716	5D	553864423	0.00069798	0.07686
TDWL	AX-111354812	5D	554173840	0.0005339	0.07793
TDWL	AX-110024940	5D	554853129	0.00042002	0.08051
TDWL	AX-109745398	5D	555041510	0.00042002	0.08051
TDWL	AX-111761048	5B	555077933	0.00087514	0.07358
TDWL	AX-111087643	6A	555709730	0.00035625	0.08229
TDWL	AX-95111256	3D	555791101	0.00077884	0.07388
TDWL	AX-109298048	3B	562062609	0.00055154	0.07758
TDWL	AX-95110233	6B	563055841	0.00031185	0.08372
TDWL	AX-109855720	6B	563996501	0.00077256	0.07526
TDWL	AX-111143764	6B	565081309	0.0003488	0.08251
TDWL	AX-108847203	1A	567714120	6.1452e-05	0.10141
TDWL	AX-111170306	1A	567967912	0.00071215	0.07551
TDWL	AX-111672733	2B	572628142	0.00058174	0.07701
TDWL	AX-108969311	2B	574043755	0.00062922	0.07617
TDWL	AX-95658280	3A	577576266	0.00020791	0.08811
TDWL	AX-109889478	6A	581237003	0.00075163	0.07426
TDWL	AX-111079727	6A	582666241	0.00066841	0.07639
TDWL	AX-110576421	6A	585446287	0.00098464	0.07138
TDWL	AX-108743917	7B	627640968	0.00098479	0.07164
TDWL	AX-111485326	7B	627697145	0.00046976	0.07931
TDWL	AX-109844760	7B	644499830	0.00052956	0.07845
TDWL	AX-110390771	7B	644945541	0.00071135	0.07485
TDWL	AX-89696347	2D	647533340	0.00057344	0.07716
TDWL	AX-111382276	2D	650067895	0.00028301	0.08527
TDWL	AX-111613388	4B	656681870	0.00092023	0.0721
TDWL	AX-111135060	5B	678927391	0.00081147	0.07421
TDWL	AX-111633901	1B	681034547	0.00060279	0.07811
TDWL	AX-108786044	2A	698009743	0.00038185	0.08154
TDWL	AX-108851996	7A	717599752	0.00097447	0.07329
TDWL	AX-111132096	7A	730540183	0.00053578	0.07899
TDWL	AX-95631786	7B	741576998	0.00057359	0.07716
TDWN	AX-109326114	1D	21743856	5.932e-05	0.10118
TDWN	AX-109401644	5B	50655258	0.00038476	0.08096
TDWN	AX-111123066	7A	55431597	0.00010259	0.09528
TDWN	AX-109325100	6A	61431458	0.0003985	0.08058
TDWN	AX-109407231	6B	366689308	0.00055936	0.0772
TDWN	AX-108962141	1B	403813869	0.00010677	0.09553
TDWN	AX-110832233	4D	507128999	0.00067101	0.07501
TDWN	AX-110525221	5A	528096918	0.00082613	0.0728
TDWN	AX-108847203	1A	567714120	0.00016592	0.09
TDWN	AX-111170306	1A	567967912	6.301e-05	0.10127
TDWN	AX-110595073	7B	627636405	0.00049161	0.07833
TDWN	AX-111485326	7B	627697145	0.00049887	0.07818
TDWN	AX-110392069	1B	639638582	0.00038072	0.0811
TDWN	AX-111736726	2A	773199108	0.00078455	0.07592
TFWH	AX-109815802	4B	10916305	0.00015999	0.08808
TFWH	AX-110525380	3B	25322853	0.00072929	0.07323
TFWH	AX-110431883	3B	66575819	0.00059968	0.07496
TFWH	AX-111154493	3B	66710235	0.00083863	0.07078
TFWH	AX-110539298	3B	524247155	0.00026292	0.08286
TFWH	AX-111256563	5A	582651331	0.00066829	0.07346
TFWH	AX-111011118	6A	604440361	0.00094451	0.0709
TFWH	AX-109462479	3B	686380203	0.00013437	0.09119
TFWH	AX-108786044	2A	698009743	0.00046334	0.07694
TFWH	AX-94559451	2B	780677715	0.00051155	0.07622
TFWL	AX-109431101	2D	2598501	0.00051134	0.07704
TFWL	AX-110483957	7A	20477304	0.00015242	0.09054
TFWL	AX-109361752	7A	22928681	0.0008236	0.07201
TFWL	AX-110481731	7A	23079649	0.00060618	0.07524
TFWL	AX-110940446	7A	23344643	0.00099314	0.07031
TFWL	AX-110607926	6B	29357151	0.00025441	0.08444
TFWL	AX-109973111	6B	33712354	0.00052733	0.07671
TFWL	AX-110002732	6D	54073201	0.00099023	0.07008
TFWL	AX-111561216	2D	59470696	0.001	0.07285
TFWL	AX-108856762	2D	62404512	0.00091983	0.07085
TFWL	AX-111125001	4A	107797877	0.00025938	0.08499
TFWL	AX-110427567	7D	43886622	0.00075574	0.07592
TFWL	AX-109651481	6A	310569613	0.00047236	0.07842
TFWL	AX-110269309	3D	371341801	0.0003276	0.08175
TFWL	AX-110739522	5A	513871610	0.00030411	0.0827
TFWL	AX-108909064	5A	513920119	0.00032711	0.08203
TFWL	AX-109337050	5A	514005305	0.00044399	0.07853
TFWL	AX-109964501	5A	514153610	0.0003089	0.08238
TFWL	AX-108806459	5A	514265095	0.00053003	0.07677
TFWL	AX-110712043	5A	515527417	0.00072068	0.07342
TFWL	AX-110607963	5A	515775754	0.0003904	0.08164
TFWL	AX-110993276	5A	516642589	0.00030879	0.08238
TFWL	AX-111603376	5A	516808961	0.00029927	0.08271
TFWL	AX-110499413	5A	517741005	0.00030722	0.08243
TFWL	AX-111464657	5A	517868926	0.00030722	0.08243
TFWL	AX-111520415	5A	520464329	7.8735e-05	0.09891
TFWL	AX-95111256	3D	555791101	0.0001376	0.091
TFWL	AX-111521500	1B	580216347	0.00098561	0.07128
TFWL	AX-108864422	3B	712772353	0.00048861	0.07752
TFWL	AX-109616863	3B	713121356	0.00056727	0.07667
TFWL	AX-109599019	3B	714372686	0.00051868	0.07711
TFWL	AX-111191528	3B	731262903	9.7266e-05	0.09472
TFWL	AX-109830120	3B	733652421	0.0003007	0.08266
TFWL	AX-110420045	3B	734091603	0.00020278	0.08685
TFWL	AX-110449033	2A	749439485	0.00081998	0.07219
TFWN	AX-109158511	4D	1807837	0.001	0.07143
TFWN	AX-110458661	4B	10794833	0.00030573	0.08339
TFWN	AX-109815802	4B	10916305	0.00010707	0.09471
TFWN	AX-109327593	4B	10944746	4.2932e-05	0.10467
TFWN	AX-111144631	4B	10971468	0.00015754	0.09053
TFWN	AX-109207027	7D	586437729	0.00045376	0.07916
TFWN	AX-111337684	3D	42304664	0.00028819	0.08402
TFWN	AX-110967901	7D	608201749	0.00098737	0.07088
TFWN	AX-111363680	7D	608209609	0.00078431	0.07392
TFWN	AX-111593353	7D	608422302	0.0005801	0.07653
TFWN	AX-111123066	7A	55431597	0.00016863	0.08981
TFWN	AX-108795642	7D	609718363	0.00042463	0.08235
TFWN	AX-109334882	7D	610532466	0.00092393	0.07158
TFWN	AX-111648340	4B	60369980	0.00091553	0.07168
TFWN	AX-109325100	6A	61431458	0.00018425	0.08884
TFWN	AX-109376346	6A	61748025	0.00094237	0.07137
TFWN	AX-111557071	4B	62963647	0.00078136	0.07336
TFWN	AX-111576144	5A	62977120	0.00075508	0.07428
TFWN	AX-109999569	4B	63121885	0.00087879	0.07228
TFWN	AX-108821036	4B	64694318	0.00091553	0.07168
TFWN	AX-111177138	4B	66802574	0.0008336	0.07288
TFWN	AX-108767647	4B	67096722	0.00091553	0.07168
TFWN	AX-110076793	4B	67558224	0.0005994	0.07625
TFWN	AX-110482282	4B	69424714	0.00091553	0.07168
TFWN	AX-111342539	2D	100544989	0.00029751	0.08368
TFWN	AX-109624261	7A	113627131	0.00060152	0.07615
TFWN	AX-108742442	2B	129354084	0.00052726	0.07807
TFWN	AX-110905120	6B	192103596	0.00089111	0.07292
TFWN	AX-111762061	6B	192866992	8.5991e-05	0.09709
TFWN	AX-109434218	6B	194581091	0.00082283	0.07341
TFWN	AX-111605442	2D	220630228	0.00043688	0.07994
TFWN	AX-109925213	6B	238298560	0.00075714	0.07372
TFWN	AX-109925088	2D	250770132	0.00050238	0.07807
TFWN	AX-111526214	4D	310458135	0.00018543	0.08978
TFWN	AX-110362294	1B	317448975	0.00063615	0.07555
TFWN	AX-110010230	1B	325283703	0.0009228	0.07159
TFWN	AX-110131390	6B	356387209	0.00074755	0.07473
TFWN	AX-108737478	1B	375098459	0.00098292	0.07092
TFWN	AX-110015801	5A	391825934	0.00092996	0.07151
TFWN	AX-108825130	1D	412083232	0.00082548	0.07337
TFWN	AX-111461756	1D	415620614	0.00089167	0.07197
TFWN	AX-110945323	5A	482678459	0.00013191	0.09245
TFWN	AX-110940138	5A	482946205	0.00040228	0.08044
TFWN	AX-110672517	5A	484101066	0.00013632	0.09241
TFWN	AX-111453407	5A	484556945	0.00018197	0.08948
TFWN	AX-111137457	5A	485204092	0.00049825	0.07816
TFWN	AX-109911851	5A	485360977	0.00039604	0.08061
TFWN	AX-110525221	5A	528096918	5.6446e-05	0.10168
TFWN	AX-111170306	1A	567967912	0.00024485	0.08603
TFWN	AX-109051790	6B	608849818	0.00038655	0.08309
TFWN	AX-109429445	1B	628037878	0.00073916	0.07397
TFWN	AX-109371329	7B	638671778	0.00087864	0.07334
TFWN	AX-110392069	1B	639638582	0.00015376	0.09083
TFWN	AX-111017399	4A	655303475	0.00037057	0.0828
TFWN	AX-110433155	4A	655430217	0.00015545	0.09067
TFWN	AX-110618966	5B	687161909	0.00024804	0.08563
TFWN	AX-110610509	5B	687712114	0.00024804	0.08563
TFWN	AX-109390851	2A	704504628	0.00047522	0.08003
TFWN	AX-89540697	7B	725377238	0.00098016	0.07202
TFWN	AX-109365636	2B	758808487	0.00038134	0.08125
