# Supplementary material for: Genome-Wide Association Study on Seedling Phenotypic Traits of Wheat under Different Nitrogen Conditions
Source: Plants (Basel). 2023 Dec 1;12(23):4050. doi: 10.3390/plants12234050 (PMC10707948; doi:10.3390/plants12234050)
Supplement: Supplementary file 1 [file plants-12-04050-s001.zip › Table S3.xlsx]

## Sheet: Sheet1
Table S3: The 1717 genes inside the 2 Mb region on each side on 41 SNPs stable among chromosomes in three environments.
Gene	Swiss-Prot description
TraesCS1A02G402100	Ribosome maturation factor RimM OS=Synechococcus sp.;;
TraesCS1A02G402200	General transcription factor 3C polypeptide 2 OS=Mus musculus OX=10090 GN=Gtf3c2 PE=2 SV=2;;
TraesCS1A02G402300	Beta-adaptin-like protein A OS=Arabidopsis thaliana OX=3702 GN=BETAA-AD PE=1 SV=1;;
TraesCS1A02G402400	Mitogen-activated protein kinase 7 OS=Oryza sativa subsp. japonica OX=39947 GN=MPK7 PE=2 SV=1;;
TraesCS1A02G402500	GDP-mannose 3,5-epimerase 1 OS=Oryza sativa subsp. indica OX=39946 GN=OsI_032456 PE=2 SV=1;;
TraesCS1A02G402600	NA
TraesCS1A02G402700	NA
TraesCS1A02G402800	Eukaryotic translation initiation factor 3 subunit D OS=Arabidopsis thaliana OX=3702 GN=TIF3D1 PE=1 SV=1;;
TraesCS1A02G402900	NA
TraesCS1A02G403000	Cold-regulated 413 inner membrane protein 1, chloroplastic OS=Arabidopsis thaliana OX=3702 GN=COR413IM1 PE=1 SV=1;;
TraesCS1A02G403100	NA
TraesCS1A02G403200	NA
TraesCS1A02G403300	Chlorophyll a-b binding protein, chloroplastic OS=Triticum aestivum OX=4565 GN=WHAB1.6 PE=3 SV=1;;
TraesCS1A02G403400	Ribosomal protein S10, mitochondrial OS=Pisum sativum OX=3888 GN=RPS10 PE=2 SV=1;;
TraesCS1A02G403500	Mediator of RNA polymerase II transcription subunit 15a OS=Arabidopsis thaliana OX=3702 GN=MED15A PE=1 SV=1;;
TraesCS1A02G403600	Histone H4 OS=Solanum chacoense OX=4108 PE=3 SV=3;;
TraesCS1A02G403700	NA
TraesCS1A02G403800	NA
TraesCS1A02G403900	NA
TraesCS1A02G404200	NA
TraesCS1A02G404300	ABC transporter C family member 2 OS=Arabidopsis thaliana OX=3702 GN=ABCC2 PE=1 SV=2;;
TraesCS1A02G404400	NA
TraesCS1A02G404500	Phytepsin OS=Hordeum vulgare OX=4513 PE=1 SV=1;;
TraesCS1A02G404600	Subtilisin-like protease SBT3.9 OS=Arabidopsis thaliana OX=3702 GN=SBT3.9 PE=3 SV=1;;
TraesCS1A02G404700	AdoMet-dependent rRNA methyltransferase spb1 OS=Neurospora crassa;;
TraesCS1A02G404800	Protein RADIALIS-like 3 OS=Arabidopsis thaliana OX=3702 GN=RL3 PE=2 SV=1;;
TraesCS1A02G404900	NA
TraesCS1A02G405000	Protein RADIALIS-like 1 OS=Arabidopsis thaliana OX=3702 GN=RL1 PE=2 SV=1;;
TraesCS1A02G405100	NA
TraesCS1A02G405200	Protein RADIALIS-like 1 OS=Arabidopsis thaliana OX=3702 GN=RL1 PE=2 SV=1;;
TraesCS1A02G405300	NA
TraesCS1A02G405400	Protein RADIALIS-like 1 OS=Arabidopsis thaliana OX=3702 GN=RL1 PE=2 SV=1;;
TraesCS1A02G405500	Putative DNA-3-methyladenine glycosylase YfjP OS=Bacillus subtilis;;
TraesCS1A02G405600	Sugar transporter ERD6-like 4 OS=Arabidopsis thaliana OX=3702 GN=At1g19450 PE=2 SV=1;;
TraesCS1A02G405700	Glycine-rich RNA-binding protein 5, mitochondrial OS=Arabidopsis thaliana OX=3702 GN=RBG5 PE=1 SV=1;;
TraesCS1A02G405800	Sugar transporter ERD6-like 4 OS=Arabidopsis thaliana OX=3702 GN=At1g19450 PE=2 SV=1;;
TraesCS1A02G405900	NA
TraesCS1A02G406000	NA
TraesCS1A02G406100	NA
TraesCS1A02G406200	3-ketoacyl-CoA synthase 4 OS=Arabidopsis thaliana OX=3702 GN=KCS4 PE=2 SV=1;;
TraesCS1A02G406300	Iron-sulfur cluster assembly protein 1 OS=Arabidopsis thaliana OX=3702 GN=ISU1 PE=2 SV=1;;
TraesCS1A02G406400	NA
TraesCS1A02G406500	50S ribosomal protein L12-2, chloroplastic OS=Secale cereale OX=4550 GN=RPL12-2 PE=2 SV=1;;
TraesCS1A02G406600	Transcription factor MYB21 OS=Arabidopsis thaliana OX=3702 GN=MYB21 PE=1 SV=1;;
TraesCS1A02G406700	UDP-glycosyltransferase 73C2 OS=Arabidopsis thaliana OX=3702 GN=UGT73C2 PE=3 SV=1;;
TraesCS1A02G406800	Expansin-A31 OS=Oryza sativa subsp. japonica OX=39947 GN=EXPA31 PE=2 SV=2;;
TraesCS1A02G406900	Expansin-A31 OS=Oryza sativa subsp. japonica OX=39947 GN=EXPA31 PE=2 SV=2;;
TraesCS1A02G407000	Rust resistance kinase Lr10 OS=Triticum aestivum OX=4565 GN=LRK10 PE=2 SV=1;;
TraesCS1A02G407100	Prohibitin-1, mitochondrial OS=Arabidopsis thaliana OX=3702 GN=PHB1 PE=1 SV=1;;
TraesCS1A02G407200	NA
TraesCS1A02G407300	NA
TraesCS1A02G407400	NA
TraesCS1B02G061100	Epoxide hydrolase A OS=Mycobacterium tuberculosis;;
TraesCS1B02G061200	Putative potassium transporter 12 OS=Oryza sativa subsp. japonica OX=39947 GN=HAK12 PE=2 SV=1;;
TraesCS1B02G061300	Histidine-containing phosphotransfer protein 2 OS=Oryza sativa subsp. japonica OX=39947 GN=AHP2 PE=1 SV=1;;
TraesCS1B02G061400	NA
TraesCS1B02G061500	Histidine-containing phosphotransfer protein 2 OS=Oryza sativa subsp. japonica OX=39947 GN=AHP2 PE=1 SV=1;;
TraesCS1B02G061600	F-box/LRR-repeat protein 14 OS=Arabidopsis thaliana OX=3702 GN=FBL14 PE=2 SV=1;;
TraesCS1B02G061700	F-box/LRR-repeat protein 14 OS=Arabidopsis thaliana OX=3702 GN=FBL14 PE=2 SV=1;;
TraesCS1B02G061800	NA
TraesCS1B02G061900	NA
TraesCS1B02G062000	NA
TraesCS1B02G062100	UDP-glycosyltransferase 83A1 OS=Arabidopsis thaliana OX=3702 GN=UGT83A1 PE=2 SV=1;;
TraesCS1B02G062200	L-type lectin-domain containing receptor kinase IV.1 OS=Arabidopsis thaliana OX=3702 GN=LECRK41 PE=2 SV=1;;
TraesCS1B02G062300	L-type lectin-domain containing receptor kinase IV.1 OS=Arabidopsis thaliana OX=3702 GN=LECRK41 PE=2 SV=1;;
TraesCS1B02G062400	NA
TraesCS1B02G062500	NA
TraesCS1B02G062600	NA
TraesCS1B02G062700	Elongation factor 2 OS=Cryptosporidium parvum OX=5807 PE=3 SV=1;;
TraesCS1B02G062800	Putative F-box/LRR-repeat protein At4g00320 OS=Arabidopsis thaliana OX=3702 GN=At4g00320 PE=4 SV=1;;
TraesCS1B02G062900	Ankyrin-1 OS=Homo sapiens OX=9606 GN=ANK1 PE=1 SV=3;;
TraesCS1B02G063100	Transcription termination factor MTERF4, chloroplastic OS=Arabidopsis thaliana OX=3702 GN=MTERF4 PE=1 SV=1;;
TraesCS1B02G063200	NA
TraesCS1B02G063300	NA
TraesCS1B02G063400	NA
TraesCS1B02G063500	Protein GLE1 OS=Arabidopsis thaliana OX=3702 GN=GLE1 PE=1 SV=1;;
TraesCS1B02G063600	NA
TraesCS1B02G063700	NA
TraesCS1B02G063800	Non-specific lipid transfer protein GPI-anchored 2 OS=Arabidopsis thaliana OX=3702 GN=LTPG2 PE=2 SV=1;;
TraesCS1B02G063900	NA
TraesCS1B02G064000	NA
TraesCS1B02G064100	NA
TraesCS1B02G064200	NA
TraesCS1B02G064300	NA
TraesCS1B02G064400	NA
TraesCS1B02G064500	Probable leucine-rich repeat receptor-like protein kinase At1g35710 OS=Arabidopsis thaliana OX=3702 GN=At1g35710 PE=2 SV=1;;
TraesCS1B02G064600	NA
TraesCS1B02G064700	NA
TraesCS1B02G064800	Cytochrome P450 71A1 OS=Persea americana OX=3435 GN=CYP71A1 PE=1 SV=2;;
TraesCS1B02G064900	Replication factor C subunit 3 OS=Arabidopsis thaliana OX=3702 GN=RFC3 PE=2 SV=1;;
TraesCS1B02G065000	Xylanase inhibitor protein 1 OS=Oryza sativa subsp. japonica OX=39947 GN=RIXI PE=1 SV=1;;
TraesCS1B02G065100	MDIS1-interacting receptor like kinase 2 OS=Arabidopsis thaliana OX=3702 GN=MIK2 PE=1 SV=3;;
TraesCS1B02G065200	NADH-ubiquinone oxidoreductase chain 1 OS=Citrullus lanatus OX=3654 GN=ND1 PE=2 SV=1;;
TraesCS1B02G065300	ATP synthase subunit a OS=Triticum timopheevii OX=4570 GN=ATP6 PE=3 SV=1;;
TraesCS1B02G065400	NA
TraesCS1B02G065500	Cytochrome c biogenesis CcmF C-terminal-like mitochondrial protein OS=Arabidopsis thaliana OX=3702 GN=CCMFC PE=1 SV=2;;
TraesCS1B02G065600	NA
TraesCS1B02G065700	Nuclear pore complex protein NUP107 OS=Arabidopsis thaliana OX=3702 GN=NUP107 PE=1 SV=1;;
TraesCS1B02G174800	40S ribosomal protein S17-4 OS=Arabidopsis thaliana OX=3702 GN=RPS17D PE=2 SV=3;;
TraesCS1B02G174900	Flotillin-like protein 2 OS=Oryza sativa subsp. japonica OX=39947 GN=FLOT2 PE=3 SV=1;;
TraesCS1B02G175000	NA
TraesCS1B02G175100	NA
TraesCS1B02G175300	NA
TraesCS1B02G175500	NA
TraesCS1B02G175600	NA
TraesCS1B02G175700	Nascent polypeptide-associated complex subunit beta OS=Arabidopsis thaliana OX=3702 GN=At1g73230 PE=2 SV=1;;
TraesCS1B02G175800	NA
TraesCS1B02G175900	Cysteine-rich receptor-like protein kinase 2 OS=Arabidopsis thaliana OX=3702 GN=CRK2 PE=2 SV=1;;
TraesCS1B02G176100	Pre-mRNA-processing protein 40C OS=Arabidopsis thaliana OX=3702 GN=MED35C PE=1 SV=1;;
TraesCS1B02G176200	Pentatricopeptide repeat-containing protein At5g61990, mitochondrial OS=Arabidopsis thaliana OX=3702 GN=At5g61990 PE=2 SV=1;;
TraesCS1B02G176300	Type III polyketide synthase A OS=Arabidopsis thaliana OX=3702 GN=PKSA PE=1 SV=1;;
TraesCS1B02G176400	Probable N-succinyldiaminopimelate aminotransferase DapC OS=Mycobacterium tuberculosis;;
TraesCS1B02G176500	NA
TraesCS1B02G176600	Pentatricopeptide repeat-containing protein At1g09820 OS=Arabidopsis thaliana OX=3702 GN=At1g09820 PE=2 SV=1;;
TraesCS1B02G176800	Ankyrin-1 OS=Mus musculus OX=10090 GN=Ank1 PE=1 SV=2;;
TraesCS1B02G178400	NA
TraesCS1B02G178500	Thioredoxin-like protein YLS8 OS=Arabidopsis thaliana OX=3702 GN=YLS8 PE=2 SV=1;;
TraesCS1B02G178600	NA
TraesCS1B02G178700	NA
TraesCS1B02G178800	Nijmegen breakage syndrome 1 protein OS=Oryza sativa subsp. japonica OX=39947 GN=NBS1 PE=1 SV=1;;
TraesCS1B02G178900	Uncharacterized sugar kinase YeiI OS=Escherichia coli;;
TraesCS1B02G179000	E3 ubiquitin-protein ligase RING1 OS=Gossypium hirsutum OX=3635 GN=RING1 PE=1 SV=1;;
TraesCS1B02G179100	Probable prefoldin subunit 5 OS=Arabidopsis thaliana OX=3702 GN=At5g23290 PE=2 SV=1;;
TraesCS1B02G179200	Vacuolar protein sorting-associated protein 52 A OS=Arabidopsis thaliana OX=3702 GN=VPS52 PE=1 SV=1;;
TraesCS1B02G179300	NA
TraesCS1B02G179400	NA
TraesCS1B02G179500	Myosin-1 OS=Arabidopsis thaliana OX=3702 GN=VIII-1 PE=1 SV=1;;
TraesCS1B02G179600	NA
TraesCS1B02G179700	Pentatricopeptide repeat-containing protein At2g22070 OS=Arabidopsis thaliana OX=3702 GN=PCMP-H41 PE=3 SV=1;;
TraesCS1B02G179709	Pentatricopeptide repeat-containing protein At2g33680 OS=Arabidopsis thaliana OX=3702 GN=PCMP-E19 PE=3 SV=1;;
TraesCS1B02G179800	Putative GEM-like protein 8 OS=Arabidopsis thaliana OX=3702 GN=At5g23370 PE=3 SV=1;;
TraesCS1B02G180000	NA
TraesCS1B02G180100	Ubiquitin carboxyl-terminal hydrolase 12 OS=Arabidopsis thaliana OX=3702 GN=UBP12 PE=1 SV=2;;
TraesCS1B02G180200	Subtilisin-like protease SBT1.2 OS=Arabidopsis thaliana OX=3702 GN=SBT1.2 PE=2 SV=1;;
TraesCS1B02G180300	Protein FLX-like 3 OS=Arabidopsis thaliana OX=3702 GN=FLXL3 PE=1 SV=1;;
TraesCS1B02G180400	Ubiquitin carboxyl-terminal hydrolase 12 OS=Arabidopsis thaliana OX=3702 GN=UBP12 PE=1 SV=2;;
TraesCS1B02G180500	TNF receptor-associated factor homolog 1a OS=Arabidopsis thaliana OX=3702 GN=TRAF1A PE=1 SV=1;;
TraesCS1B02G180600	Ubiquitin carboxyl-terminal hydrolase 12 OS=Arabidopsis thaliana OX=3702 GN=UBP12 PE=1 SV=2;;
TraesCS1B02G180700	Nucleolar complex protein 2 homolog OS=Oryza sativa subsp. japonica OX=39947 GN=Os10g0495500 PE=2 SV=1;;
TraesCS1B02G180800	Vacuolar-sorting protein BRO1 OS=Arabidopsis thaliana OX=3702 GN=BRO1 PE=1 SV=1;;
TraesCS1B02G203200	Probable receptor-like protein kinase At1g33260 OS=Arabidopsis thaliana OX=3702 GN=At1g33260 PE=2 SV=1;;
TraesCS1B02G203300	Trihelix transcription factor GT-2 OS=Arabidopsis thaliana OX=3702 GN=GT-2 PE=2 SV=1;;
TraesCS1B02G203400	Protein CDI OS=Arabidopsis thaliana OX=3702 GN=CDI PE=2 SV=1;;
TraesCS1B02G203500	Electron transfer flavoprotein-ubiquinone oxidoreductase, mitochondrial OS=Oryza sativa subsp. japonica OX=39947 GN=Os10g0516300 PE=3 SV=1;;
TraesCS1B02G203600	U1 small nuclear ribonucleoprotein 70 kDa OS=Arabidopsis thaliana OX=3702 GN=RNU1 PE=1 SV=1;;
TraesCS1B02G203700	NA
TraesCS1B02G203800	Protein YABBY 3 OS=Oryza sativa subsp. japonica OX=39947 GN=YAB3 PE=2 SV=1;;
TraesCS1B02G203900	Protein GRAVITROPIC IN THE LIGHT 1 OS=Arabidopsis thaliana OX=3702 GN=GIL1 PE=2 SV=1;;
TraesCS1B02G204000	50S ribosomal protein L24, chloroplastic OS=Spinacia oleracea OX=3562 GN=RPL24 PE=1 SV=2;;
TraesCS1B02G204100	Monocopper oxidase-like protein SKU5 OS=Arabidopsis thaliana OX=3702 GN=SKU5 PE=1 SV=1;;
TraesCS1B02G204200	NADH-ubiquinone oxidoreductase chain 1 OS=Citrullus lanatus OX=3654 GN=ND1 PE=2 SV=1;;
TraesCS1B02G204300	NA
TraesCS1B02G204400	Vesicle-associated protein 1-1 OS=Arabidopsis thaliana OX=3702 GN=PVA11 PE=1 SV=1;;
TraesCS1B02G204500	NA
TraesCS1B02G204600	Sperm-associated antigen 1 OS=Homo sapiens OX=9606 GN=SPAG1 PE=1 SV=3;;
TraesCS1B02G204700	Valine--tRNA ligase, mitochondrial 1 OS=Arabidopsis thaliana OX=3702 GN=TWN2 PE=1 SV=2;;
TraesCS1B02G204800	Pentatricopeptide repeat-containing protein At3g60050 OS=Arabidopsis thaliana OX=3702 GN=At3g60050 PE=2 SV=1;;
TraesCS1B02G204900	NA
TraesCS1B02G205400	Non-lysosomal glucosylceramidase OS=Homo sapiens OX=9606 GN=GBA2 PE=1 SV=2;;
TraesCS1B02G205500	NA
TraesCS1B02G205600	Uncharacterized GPI-anchored protein At1g61900 OS=Arabidopsis thaliana OX=3702 GN=At1g61900 PE=1 SV=1;;
TraesCS1B02G205700	Deubiquitinase DESI2 OS=Danio rerio OX=7955 GN=desi2 PE=2 SV=1;;
TraesCS1B02G205800	Plant intracellular Ras-group-related LRR protein 5 OS=Oryza sativa subsp. japonica OX=39947 GN=IRL5 PE=2 SV=1;;
TraesCS1B02G205900	NA
TraesCS1B02G206000	3-hydroxyisobutyryl-CoA hydrolase 1 OS=Arabidopsis thaliana OX=3702 GN=CHY1 PE=1 SV=1;;
TraesCS1B02G206100	AT-hook motif nuclear-localized protein 10 OS=Arabidopsis thaliana OX=3702 GN=AHL10 PE=1 SV=2;;
TraesCS1B02G206200	Uncharacterized sugar kinase slr0537 OS=Synechocystis sp.;;
TraesCS1B02G206300	Uncharacterized protein At2g38710 OS=Arabidopsis thaliana OX=3702 GN=At2g38710 PE=2 SV=1;;
TraesCS1B02G206400	NA
TraesCS1B02G206500	NA
TraesCS1B02G206600	Abscisic acid receptor PYL1 OS=Arabidopsis thaliana OX=3702 GN=PYL1 PE=1 SV=1;;
TraesCS1B02G206700	Heat shock 70 kDa protein 17 OS=Arabidopsis thaliana OX=3702 GN=HSP70-17 PE=2 SV=1;;
TraesCS1B02G206800	Mitochondrial carnitine/acylcarnitine carrier-like protein OS=Arabidopsis thaliana OX=3702 GN=BOU PE=1 SV=1;;
TraesCS1B02G206900	Mitochondrial carnitine/acylcarnitine carrier-like protein OS=Arabidopsis thaliana OX=3702 GN=BOU PE=1 SV=1;;
TraesCS1B02G207000	NA
TraesCS1B02G207100	60S ribosomal export protein NMD3 OS=Dictyostelium discoideum OX=44689 GN=nmd3 PE=3 SV=1;;
TraesCS1B02G207300	Protein DGS1, mitochondrial OS=Arabidopsis thaliana OX=3702 GN=DGS1 PE=1 SV=1;;
TraesCS1B02G207500	Armadillo repeat-containing protein 7 OS=Mus musculus OX=10090 GN=Armc7 PE=1 SV=2;;
TraesCS1B02G207600	Replication factor C subunit 5 OS=Oryza sativa subsp. japonica OX=39947 GN=RFC5 PE=2 SV=1;;
TraesCS1B02G207700	NA
TraesCS1B02G207800	Ubiquitin carboxyl-terminal hydrolase 21 OS=Arabidopsis thaliana OX=3702 GN=UBP21 PE=2 SV=1;;
TraesCS1B02G207900	ADP-ribosylation factor GTPase-activating protein AGD10 OS=Arabidopsis thaliana OX=3702 GN=AGD10 PE=2 SV=1;;
TraesCS1B02G208100	DnaJ homolog subfamily C GRV2 OS=Arabidopsis thaliana OX=3702 GN=GRV2 PE=1 SV=1;;
TraesCS1B02G223500	Protein HEAT INTOLERANT 4 OS=Arabidopsis thaliana OX=3702 GN=HIT4 PE=1 SV=1;;
TraesCS1B02G223600	NADH dehydrogenase [ubiquinone] 1 beta subcomplex subunit 8, mitochondrial OS=Arabidopsis thaliana OX=3702 GN=At5g47570 PE=2 SV=1;;
TraesCS1B02G223700	Cortical cell-delineating protein OS=Zea mays OX=4577 PE=2 SV=1;;
TraesCS1B02G223900	NA
TraesCS1B02G224000	NA
TraesCS1B02G224100	Altered inheritance of mitochondria protein 32 OS=Meyerozyma guilliermondii;;
TraesCS1B02G224200	3-hydroxyisobutyryl-CoA hydrolase-like protein 2, mitochondrial OS=Arabidopsis thaliana OX=3702 GN=At4g31810 PE=1 SV=1;;
TraesCS1B02G224300	Probable trehalose-phosphate phosphatase 2 OS=Oryza sativa subsp. japonica OX=39947 GN=TPP2 PE=1 SV=1;;
TraesCS1B02G224400	NA
TraesCS1B02G224500	Probable xyloglucan galactosyltransferase GT19 OS=Arabidopsis thaliana OX=3702 GN=GT19 PE=2 SV=1;;
TraesCS1B02G224600	Flavin-containing monooxygenase FMO GS-OX-like 4 OS=Arabidopsis thaliana OX=3702 GN=At1g62600 PE=2 SV=1;;
TraesCS1B02G224700	NA
TraesCS1B02G224800	Oxysterol-binding protein-related protein 2A OS=Arabidopsis thaliana OX=3702 GN=ORP2A PE=2 SV=1;;
TraesCS1B02G224900	Protein NRT1/ PTR FAMILY 6.3 OS=Arabidopsis thaliana OX=3702 GN=NPF6.3 PE=1 SV=1;;
TraesCS1B02G225000	NA
TraesCS1B02G225100	Cortical cell-delineating protein OS=Zea mays OX=4577 PE=2 SV=1;;
TraesCS1B02G225200	QWRF motif-containing protein 7 OS=Arabidopsis thaliana OX=3702 GN=QWRF7 PE=2 SV=1;;
TraesCS1B02G225400	Putative pre-16S rRNA nuclease OS=Rickettsia felis;;
TraesCS1B02G225500	Zinc finger protein ZAT9 OS=Arabidopsis thaliana OX=3702 GN=ZAT9 PE=2 SV=1;;
TraesCS1B02G225600	NA
TraesCS1B02G225700	Expansin-B6 OS=Oryza sativa subsp. japonica OX=39947 GN=EXPB6 PE=2 SV=1;;
TraesCS1B02G225800	NA
TraesCS1B02G225900	Expansin-B2 OS=Oryza sativa subsp. japonica OX=39947 GN=EXPB2 PE=2 SV=2;;
TraesCS1B02G226000	Expansin-B3 OS=Oryza sativa subsp. japonica OX=39947 GN=EXPB3 PE=2 SV=2;;
TraesCS1B02G226100	Expansin-B4 OS=Oryza sativa subsp. japonica OX=39947 GN=EXPB4 PE=2 SV=1;;
TraesCS1B02G226200	NA
TraesCS1B02G229800	Mediator of RNA polymerase II transcription subunit 31 OS=Arabidopsis thaliana OX=3702 GN=MED31 PE=1 SV=1;;
TraesCS1B02G230100	Cyclin-P4-1 OS=Oryza sativa subsp. japonica OX=39947 GN=CYCP4-1 PE=2 SV=1;;
TraesCS1B02G230200	NA
TraesCS1B02G230300	Nucleoside diphosphate kinase 1 OS=Saccharum officinarum OX=4547 GN=NDPK1 PE=1 SV=1;;
TraesCS1B02G230500	Peptide methionine sulfoxide reductase A4, chloroplastic OS=Oryza sativa subsp. japonica OX=39947 GN=MSRA4 PE=2 SV=2;;
TraesCS1B02G230600	Cell division cycle 7-related protein kinase OS=Homo sapiens OX=9606 GN=CDC7 PE=1 SV=1;;
TraesCS1B02G230800	NA
TraesCS1B02G231000	12-oxophytodienoate reductase 1 OS=Oryza sativa subsp. japonica OX=39947 GN=OPR1 PE=2 SV=1;;
TraesCS1B02G231100	NA
TraesCS1B02G231200	WD repeat-containing protein WRAP73 OS=Homo sapiens OX=9606 GN=WRAP73 PE=1 SV=1;;
TraesCS1B02G231300	Protein ARABIDILLO 1 OS=Arabidopsis thaliana OX=3702 GN=FBX5 PE=1 SV=1;;
TraesCS1B02G231400	Palmitoyl-protein thioesterase 1 OS=Caenorhabditis elegans OX=6239 GN=ppt-1 PE=2 SV=2;;
TraesCS1B02G231600	Nitrate regulatory gene2 protein OS=Arabidopsis thaliana OX=3702 GN=NRG2 PE=1 SV=1;;
TraesCS1B02G231700	NA
TraesCS1B02G231900	ABC transporter E family member 2 OS=Arabidopsis thaliana OX=3702 GN=ABCE2 PE=2 SV=1;;
TraesCS1B02G232000	Serine/threonine-protein kinase D6PKL1 OS=Arabidopsis thaliana OX=3702 GN=D6PKL1 PE=1 SV=1;;
TraesCS1B02G232200	Serine hydroxymethyltransferase 4 OS=Arabidopsis thaliana OX=3702 GN=SHM4 PE=1 SV=1;;
TraesCS1B02G232300	Transcription factor MYBS2 OS=Oryza sativa subsp. japonica OX=39947 GN=MYBS2 PE=2 SV=1;;
TraesCS1B02G410700	Putative cyclin-dependent kinase F-2 OS=Oryza sativa subsp. japonica OX=39947 GN=CDKF-2 PE=3 SV=1;;
TraesCS1B02G410800	NA
TraesCS1B02G410900	Putative F-box/kelch-repeat protein At1g12870 OS=Arabidopsis thaliana OX=3702 GN=At1g12870 PE=4 SV=2;;
TraesCS1B02G411000	DNA replication complex GINS protein PSF2 OS=Arabidopsis thaliana OX=3702 GN=GINS2 PE=2 SV=2;;
TraesCS1B02G411200	NA
TraesCS1B02G411400	F-box protein At5g49610 OS=Arabidopsis thaliana OX=3702 GN=At5g49610 PE=1 SV=1;;
TraesCS1B02G411500	NA
TraesCS1B02G411600	NA
TraesCS1B02G411700	NA
TraesCS1B02G411800	Protein tesmin/TSO1-like CXC 4 OS=Arabidopsis thaliana OX=3702 GN=TCX4 PE=1 SV=1;;
TraesCS1B02G411900	O-acyltransferase WSD1 OS=Arabidopsis thaliana OX=3702 GN=WSD1 PE=2 SV=1;;
TraesCS1B02G412000	BTB/POZ and MATH domain-containing protein 2 OS=Arabidopsis thaliana OX=3702 GN=BPM2 PE=1 SV=1;;
TraesCS1B02G412100	Cytochrome b561 and DOMON domain-containing protein At3g61750 OS=Arabidopsis thaliana OX=3702 GN=At3g61750 PE=3 SV=1;;
TraesCS1B02G412200	GDSL esterase/lipase At4g16230 OS=Arabidopsis thaliana OX=3702 GN=At4g16230 PE=3 SV=2;;
TraesCS1B02G412300	NA
TraesCS1B02G412400	NA
TraesCS1B02G412500	NA
TraesCS1B02G412600	NA
TraesCS1B02G412700	NA
TraesCS1B02G412800	NA
TraesCS1B02G412900	NA
TraesCS1B02G413000	Cytochrome b OS=Zea mays OX=4577 GN=MT-CYB PE=3 SV=2;;
TraesCS1B02G413100	NA
TraesCS1B02G413200	Cytochrome c oxidase subunit 3 OS=Oryza sativa subsp. indica OX=39946 GN=COX3 PE=3 SV=2;;
TraesCS1B02G413300	Probable purine permease 4 OS=Arabidopsis thaliana OX=3702 GN=PUP4 PE=2 SV=1;;
TraesCS1B02G413400	Probable purine permease 4 OS=Arabidopsis thaliana OX=3702 GN=PUP4 PE=2 SV=1;;
TraesCS1B02G413500	Probable purine permease 4 OS=Arabidopsis thaliana OX=3702 GN=PUP4 PE=2 SV=1;;
TraesCS1B02G413600	NA
TraesCS1B02G413700	60S ribosomal protein L37a-1 OS=Oryza sativa subsp. japonica OX=39947 GN=Os01g0679700 PE=1 SV=1;;
TraesCS1B02G413800	NA
TraesCS1B02G413900	NA
TraesCS1B02G414000	Protein MIZU-KUSSEI 1 OS=Arabidopsis thaliana OX=3702 GN=MIZ1 PE=1 SV=1;;
TraesCS1B02G414100	Transcription repressor OFP8 OS=Oryza sativa subsp. japonica OX=39947 GN=OFP8 PE=1 SV=1;;
TraesCS1B02G414200	Wall-associated receptor kinase 3 OS=Arabidopsis thaliana OX=3702 GN=WAK3 PE=2 SV=2;;
TraesCS1B02G414300	Formin-like protein 14 OS=Oryza sativa subsp. japonica OX=39947 GN=FH14 PE=2 SV=1;;
TraesCS1B02G414400	60S ribosomal protein L2, mitochondrial OS=Oryza sativa subsp. japonica OX=39947 GN=RPL2 PE=2 SV=2;;
TraesCS1B02G414500	NA
TraesCS1B02G414600	NA
TraesCS1B02G414700	NA
TraesCS1B02G414800	Aspartic proteinase NANA, chloroplast OS=Arabidopsis thaliana OX=3702 GN=NANA PE=1 SV=1;;
TraesCS1B02G414900	Cytosolic sulfotransferase 6 OS=Arabidopsis thaliana OX=3702 GN=SOT6 PE=2 SV=1;;
TraesCS1B02G415000	NA
TraesCS1B02G415100	MACPF domain-containing protein NSL1 OS=Arabidopsis thaliana OX=3702 GN=NSL1 PE=2 SV=1;;
TraesCS1B02G415200	MACPF domain-containing protein NSL1 OS=Arabidopsis thaliana OX=3702 GN=NSL1 PE=2 SV=1;;
TraesCS1B02G415300	NA
TraesCS1B02G415400	NA
TraesCS1B02G415500	NA
TraesCS1B02G415600	Disease resistance protein RPS5 OS=Arabidopsis thaliana OX=3702 GN=RPS5 PE=1 SV=2;;
TraesCS1B02G415700	Pre-mRNA-processing-splicing factor 8A OS=Arabidopsis thaliana OX=3702 GN=PRP8A PE=1 SV=1;;
TraesCS1B02G415800	Probable ubiquitin-conjugating enzyme E2 24 OS=Arabidopsis thaliana OX=3702 GN=UBC24 PE=1 SV=1;;
TraesCS1B02G415900	50S ribosomal protein L21, mitochondrial OS=Arabidopsis thaliana OX=3702 GN=RPL21M PE=2 SV=1;;
TraesCS1B02G416000	NA
TraesCS1B02G416100	NA
TraesCS1B02G416200	Putative disease resistance protein RGA3 OS=Solanum bulbocastanum OX=147425 GN=RGA3 PE=2 SV=2;;
TraesCS1B02G416300	NA
TraesCS1B02G416400	Pre-mRNA-processing-splicing factor 8A OS=Arabidopsis thaliana OX=3702 GN=PRP8A PE=1 SV=1;;
TraesCS1B02G416500	Ferredoxin-3, chloroplastic OS=Zea mays OX=4577 GN=FDX3 PE=1 SV=1;;
TraesCS1B02G416600	Histone H2B.2 OS=Triticum aestivum OX=4565 PE=1 SV=2;;
TraesCS1B02G416700	Serine carboxypeptidase-like 18 OS=Arabidopsis thaliana OX=3702 GN=SCPL18 PE=2 SV=2;;
TraesCS1B02G416800	NA
TraesCS1B02G416900	NA
TraesCS1B02G417000	Uncharacterized oxidoreductase At4g09670 OS=Arabidopsis thaliana OX=3702 GN=At4g09670 PE=1 SV=1;;
TraesCS1B02G417100	Cytochrome c oxidase assembly protein COX19 OS=Cryptococcus neoformans var. neoformans serotype D;;
TraesCS1B02G417200	Ribosomal L1 domain-containing protein 1 OS=Mus musculus OX=10090 GN=Rsl1d1 PE=1 SV=1;;
TraesCS1B02G417300	Short-chain type dehydrogenase/reductase OS=Picea abies OX=3329 PE=2 SV=1;;
TraesCS1D02G040500	BURP domain-containing protein 10 OS=Oryza sativa subsp. japonica OX=39947 GN=BURP10 PE=2 SV=1;;
TraesCS1D02G040536	Putative disease resistance protein RGA3 OS=Solanum bulbocastanum OX=147425 GN=RGA3 PE=2 SV=2;;
TraesCS1D02G040548	Disease resistance protein RGA2 OS=Solanum bulbocastanum OX=147425 GN=RGA2 PE=1 SV=1;;
TraesCS1D02G040600	NA
TraesCS1D02G040700	B3 domain-containing protein Os03g0619600 OS=Oryza sativa subsp. japonica OX=39947 GN=Os03g0619600 PE=2 SV=1;;
TraesCS1D02G040800	Protein MICRORCHIDIA 2 OS=Arabidopsis thaliana OX=3702 GN=MORC2 PE=1 SV=1;;
TraesCS1D02G040900	Protoheme IX farnesyltransferase, mitochondrial OS=Arabidopsis thaliana OX=3702 GN=COX10 PE=2 SV=4;;
TraesCS1D02G041000	NA
TraesCS1D02G041100	NA
TraesCS1D02G041200	Glucose-6-phosphate isomerase, cytosolic OS=Zea mays OX=4577 GN=PHI1 PE=2 SV=1;;
TraesCS1D02G041300	NA
TraesCS1D02G041400	DNA-binding protein HEXBP OS=Leishmania major OX=5664 GN=HEXBP PE=4 SV=1;;
TraesCS1D02G041500	NA
TraesCS1D02G041600	Zinc finger protein ZAT12 OS=Arabidopsis thaliana OX=3702 GN=ZAT12 PE=2 SV=1;;
TraesCS1D02G041700	Zinc finger protein ZAT12 OS=Arabidopsis thaliana OX=3702 GN=ZAT12 PE=2 SV=1;;
TraesCS1D02G041800	NA
TraesCS1D02G041900	NA
TraesCS1D02G042100	3-ketoacyl-CoA synthase 12 OS=Arabidopsis thaliana OX=3702 GN=KCS12 PE=2 SV=1;;
TraesCS1D02G042200	Disease resistance protein RPM1 OS=Arabidopsis thaliana OX=3702 GN=RPM1 PE=1 SV=1;;
TraesCS1D02G042300	NA
TraesCS1D02G042400	Protein TANC2 OS=Mus musculus OX=10090 GN=Tanc2 PE=1 SV=1;;
TraesCS1D02G042500	Ankyrin-2 OS=Homo sapiens OX=9606 GN=ANK2 PE=1 SV=4;;
TraesCS1D02G042600	NA
TraesCS1D02G042700	NA
TraesCS1D02G042800	Putative germin-like protein 9-2 OS=Oryza sativa subsp. japonica OX=39947 GN=Os09g0568600 PE=3 SV=1;;
TraesCS1D02G042900	Curved DNA-binding protein OS=Pseudomonas syringae pv. tomato;;
TraesCS1D02G043000	NA
TraesCS1D02G043100	NA
TraesCS1D02G043200	NA
TraesCS1D02G043300	Myb-related protein MYBAS2 OS=Oryza sativa subsp. japonica OX=39947 GN=MYBAS2 PE=2 SV=1;;
TraesCS1D02G043400	Histone-lysine N-methyltransferase family member SUVH9 OS=Arabidopsis thaliana OX=3702 GN=SUVH9 PE=1 SV=1;;
TraesCS1D02G043500	NA
TraesCS1D02G043600	AT-hook motif nuclear-localized protein 20 OS=Arabidopsis thaliana OX=3702 GN=AHL20 PE=2 SV=1;;
TraesCS1D02G043700	NA
TraesCS1D02G043800	Putative F-box protein At5g60060 OS=Arabidopsis thaliana OX=3702 GN=At5g60060 PE=4 SV=1;;
TraesCS1D02G043900	Protein FON2 SPARE1 OS=Oryza sativa subsp. indica OX=39946 GN=FOS1 PE=2 SV=1;;
TraesCS1D02G044000	Protein STIP1 homolog OS=Dictyostelium discoideum OX=44689 GN=sti1 PE=3 SV=1;;
TraesCS1D02G044100	NA
TraesCS1D02G044200	NA
TraesCS1D02G044300	Laccase-25 OS=Oryza sativa subsp. japonica OX=39947 GN=LAC25 PE=3 SV=1;;
TraesCS2A02G147100	Probable protein arginine N-methyltransferase 3 OS=Oryza sativa subsp. japonica OX=39947 GN=PRMT3 PE=2 SV=1;;
TraesCS2A02G147200	Thymidylate kinase OS=Arabidopsis thaliana OX=3702 GN=ZEU1 PE=2 SV=1;;
TraesCS2A02G147400	Eukaryotic translation initiation factor 6-2 OS=Arabidopsis thaliana OX=3702 GN=EIF6-2 PE=2 SV=1;;
TraesCS2A02G147500	Pyrrolidone-carboxylate peptidase OS=Pyrococcus furiosus;;
TraesCS2A02G147600	Peroxidase 2 OS=Zea mays OX=4577 GN=PER2 PE=2 SV=1;;
TraesCS2A02G147800	Peroxidase 2 OS=Zea mays OX=4577 GN=PER2 PE=2 SV=1;;
TraesCS2A02G147900	Peroxidase 2 OS=Zea mays OX=4577 GN=PER2 PE=2 SV=1;;
TraesCS2A02G148100	Peroxidase 2 OS=Zea mays OX=4577 GN=PER2 PE=2 SV=1;;
TraesCS2A02G148200	Peroxidase 2 OS=Zea mays OX=4577 GN=PER2 PE=2 SV=1;;
TraesCS2A02G148300	Peroxidase 2 OS=Zea mays OX=4577 GN=PER2 PE=2 SV=1;;
TraesCS2A02G148400	Peroxidase 2 OS=Zea mays OX=4577 GN=PER2 PE=2 SV=1;;
TraesCS2A02G148600	Peroxidase 2 OS=Zea mays OX=4577 GN=PER2 PE=2 SV=1;;
TraesCS2A02G148700	Peroxidase 2 OS=Zea mays OX=4577 GN=PER2 PE=2 SV=1;;
TraesCS2A02G148900	Peroxidase 2 OS=Zea mays OX=4577 GN=PER2 PE=2 SV=1;;
TraesCS2A02G149100	Monothiol glutaredoxin-S3 OS=Oryza sativa subsp. japonica OX=39947 GN=GRXS3 PE=2 SV=1;;
TraesCS2A02G149200	Leucine--tRNA ligase, cytoplasmic OS=Arabidopsis thaliana OX=3702 GN=At1g09620 PE=1 SV=1;;
TraesCS2A02G149300	Phosphoserine phosphatase, chloroplastic OS=Arabidopsis thaliana OX=3702 GN=PSP PE=1 SV=2;;
TraesCS2A02G149400	Peroxidase 2 OS=Zea mays OX=4577 GN=PER2 PE=2 SV=1;;
TraesCS2A02G149500	Kinesin-like protein KIN-12E OS=Oryza sativa subsp. japonica OX=39947 GN=KIN12E PE=2 SV=2;;
TraesCS2A02G149600	Serine/threonine-protein kinase haspin homolog OS=Arabidopsis thaliana OX=3702 GN=HASPIN PE=1 SV=1;;
TraesCS2A02G149700	Novel plant SNARE 13 OS=Arabidopsis thaliana OX=3702 GN=NPSN13 PE=1 SV=1;;
TraesCS2A02G149900	NA
TraesCS2A02G150000	[Pyruvate dehydrogenase;;
TraesCS2A02G150100	Cellulose synthase-like protein D4 OS=Oryza sativa subsp. japonica OX=39947 GN=CSLD4 PE=2 SV=1;;
TraesCS2A02G150200	NA
TraesCS2A02G160000	Putative pentatricopeptide repeat-containing protein At3g23330 OS=Arabidopsis thaliana OX=3702 GN=PCMP-H32 PE=3 SV=1;;
TraesCS2A02G160100	Chaperone protein DnaJ OS=Hydrogenobacter thermophilus;;
TraesCS2A02G160200	NA
TraesCS2A02G160300	Apoptotic chromatin condensation inducer in the nucleus OS=Mus musculus OX=10090 GN=Acin1 PE=1 SV=3;;
TraesCS2A02G160400	NA
TraesCS2A02G160500	Mitochondrial import inner membrane translocase subunit TIM44-2 OS=Arabidopsis thaliana OX=3702 GN=TIM44-2 PE=1 SV=1;;
TraesCS2A02G160600	NA
TraesCS2A02G160700	Heavy metal-associated isoprenylated plant protein 23 OS=Arabidopsis thaliana OX=3702 GN=HIPP23 PE=1 SV=1;;
TraesCS2A02G160800	NA
TraesCS2A02G161000	Trehalose 6-phosphate phosphatase RA3 OS=Zea mays OX=4577 GN=RA3 PE=1 SV=1;;
TraesCS2A02G161100	Trehalose 6-phosphate phosphatase RA3 OS=Zea mays OX=4577 GN=RA3 PE=1 SV=1;;
TraesCS2A02G161200	Trehalose 6-phosphate phosphatase RA3 OS=Zea mays OX=4577 GN=RA3 PE=1 SV=1;;
TraesCS2A02G176200	Phosphatidylinositol glycan anchor biosynthesis class U protein OS=Homo sapiens OX=9606 GN=PIGU PE=1 SV=3;;
TraesCS2A02G176300	Ninja-family protein 1 OS=Triticum aestivum OX=4565 GN=AFP-A1 PE=3 SV=1;;
TraesCS2A02G176400	Glycerophosphodiester phosphodiesterase GDPD6 OS=Arabidopsis thaliana OX=3702 GN=GDPD6 PE=2 SV=1;;
TraesCS2A02G176500	NA
TraesCS2A02G176600	NA
TraesCS2A02G176700	NA
TraesCS2A02G176800	Fasciclin-like arabinogalactan protein 2 OS=Arabidopsis thaliana OX=3702 GN=FLA2 PE=1 SV=1;;
TraesCS2A02G176900	Fasciclin-like arabinogalactan protein 2 OS=Arabidopsis thaliana OX=3702 GN=FLA2 PE=1 SV=1;;
TraesCS2A02G177000	SNF1-related protein kinase regulatory subunit gamma-1-like OS=Arabidopsis thaliana OX=3702 GN=CBSCBS2 PE=1 SV=1;;
TraesCS2A02G177100	Histone deacetylase 5 OS=Arabidopsis thaliana OX=3702 GN=HDA5 PE=1 SV=1;;
TraesCS2A02G177200	Putative anthocyanidin reductase OS=Ginkgo biloba OX=3311 PE=2 SV=1;;
TraesCS2A02G177300	Uncharacterized hydrolase YugF OS=Bacillus subtilis;;
TraesCS2A02G177400	Putative anthocyanidin reductase OS=Ginkgo biloba OX=3311 PE=2 SV=1;;
TraesCS2A02G177500	Putative anthocyanidin reductase OS=Ginkgo biloba OX=3311 PE=2 SV=1;;
TraesCS2A02G177600	PLASMODESMATA CALLOSE-BINDING PROTEIN 3 OS=Arabidopsis thaliana OX=3702 GN=PDCB3 PE=1 SV=1;;
TraesCS2A02G177700	NA
TraesCS2A02G177800	NA
TraesCS2A02G177900	NA
TraesCS2A02G178000	NA
TraesCS2A02G178100	NA
TraesCS2A02G178200	NA
TraesCS2A02G178300	NA
TraesCS2A02G178400	NA
TraesCS2A02G178500	E3 ubiquitin-protein ligase RNF144A OS=Mus musculus OX=10090 GN=Rnf144a PE=1 SV=1;;
TraesCS2A02G178600	NA
TraesCS2A02G178700	UDP-glycosyltransferase 90A2 OS=Arabidopsis thaliana OX=3702 GN=UGT90A2 PE=2 SV=1;;
TraesCS2A02G178800	NA
TraesCS2A02G178900	MKI67 FHA domain-interacting nucleolar phosphoprotein OS=Danio rerio OX=7955 GN=nifk PE=2 SV=2;;
TraesCS2A02G179000	NA
TraesCS2A02G179100	NA
TraesCS2A02G179200	NA
TraesCS2A02G179300	Protein PELPK1 OS=Arabidopsis thaliana OX=3702 GN=PELPK1 PE=2 SV=1;;
TraesCS2A02G179400	CCA tRNA nucleotidyltransferase, mitochondrial OS=Candida glabrata;;
TraesCS2A02G179500	Protein PELPK1 OS=Arabidopsis thaliana OX=3702 GN=PELPK1 PE=2 SV=1;;
TraesCS2A02G179600	NA
TraesCS2A02G179700	Disease resistance protein RPM1 OS=Arabidopsis thaliana OX=3702 GN=RPM1 PE=1 SV=1;;
TraesCS2A02G179800	COBW domain-containing protein 1 OS=Homo sapiens OX=9606 GN=CBWD1 PE=2 SV=1;;
TraesCS2A02G179900	NA
TraesCS2A02G180000	Thaumatin-like protein 1 OS=Arabidopsis thaliana OX=3702 GN=TLP1 PE=2 SV=1;;
TraesCS2A02G180100	NA
TraesCS2A02G180200	Aldose 1-epimerase OS=Sus scrofa OX=9823 GN=GALM PE=2 SV=1;;
TraesCS2A02G180300	NA
TraesCS2A02G189800	NA
TraesCS2A02G447100	Transcription factor MYB93 OS=Arabidopsis thaliana OX=3702 GN=MYB93 PE=1 SV=1;;
TraesCS2A02G447200	Transcription factor MYB93 OS=Arabidopsis thaliana OX=3702 GN=MYB93 PE=1 SV=1;;
TraesCS2A02G447300	Transcription factor MYB93 OS=Arabidopsis thaliana OX=3702 GN=MYB93 PE=1 SV=1;;
TraesCS2A02G447400	Transcription factor MYB39 OS=Arabidopsis thaliana OX=3702 GN=MYB39 PE=2 SV=1;;
TraesCS2A02G447500	Transcription factor MYB93 OS=Arabidopsis thaliana OX=3702 GN=MYB93 PE=1 SV=1;;
TraesCS2A02G447600	NA
TraesCS2A02G447700	Transducin beta-like protein 3 OS=Rattus norvegicus OX=10116 GN=Tbl3 PE=2 SV=1;;
TraesCS2A02G447800	Uncharacterized membrane protein At4g09580 OS=Arabidopsis thaliana OX=3702 GN=At4g09580 PE=1 SV=1;;
TraesCS2A02G447900	NA
TraesCS2A02G448000	WEB family protein At5g16730, chloroplastic OS=Arabidopsis thaliana OX=3702 GN=At5g16730 PE=1 SV=1;;
TraesCS2A02G448100	NA
TraesCS2A02G448200	NA
TraesCS2A02G448300	NA
TraesCS2A02G448400	33 kDa ribonucleoprotein, chloroplastic OS=Nicotiana sylvestris OX=4096 PE=1 SV=1;;
TraesCS2A02G448500	Transcription factor MYC2 OS=Arabidopsis thaliana OX=3702 GN=MYC2 PE=1 SV=2;;
TraesCS2A02G448600	Exocyst complex component SEC15A OS=Arabidopsis thaliana OX=3702 GN=SEC15A PE=3 SV=2;;
TraesCS2A02G448700	E3 ubiquitin-protein ligase Os04g0590900 OS=Oryza sativa subsp. japonica OX=39947 GN=Os04g0590900 PE=2 SV=2;;
TraesCS2A02G448800	Transcription factor bHLH96 OS=Arabidopsis thaliana OX=3702 GN=BHLH96 PE=1 SV=1;;
TraesCS2A02G448900	Probable prolyl 4-hydroxylase 7 OS=Arabidopsis thaliana OX=3702 GN=P4H7 PE=2 SV=1;;
TraesCS2A02G449100	NA
TraesCS2A02G449200	Transcriptional regulator SUPERMAN OS=Arabidopsis thaliana OX=3702 GN=SUP PE=1 SV=1;;
TraesCS2A02G449300	AT-hook motif nuclear-localized protein 23 OS=Arabidopsis thaliana OX=3702 GN=AHL23 PE=1 SV=1;;
TraesCS2A02G449400	Heavy metal-associated isoprenylated plant protein 7 OS=Arabidopsis thaliana OX=3702 GN=HIPP07 PE=1 SV=1;;
TraesCS2A02G449500	AT-hook motif nuclear-localized protein 10 OS=Arabidopsis thaliana OX=3702 GN=AHL10 PE=1 SV=2;;
TraesCS2A02G449561	NA
TraesCS2A02G449600	NA
TraesCS2A02G449700	NA
TraesCS2A02G449800	NA
TraesCS2A02G449900	Salicylic acid-binding protein 2 OS=Nicotiana tabacum OX=4097 GN=SABP2 PE=1 SV=1;;
TraesCS2A02G450000	Methylesterase 3 OS=Arabidopsis thaliana OX=3702 GN=MES3 PE=2 SV=1;;
TraesCS2A02G450100	NA
TraesCS2A02G450200	NA
TraesCS2A02G450300	NA
TraesCS2A02G450400	Alpha-1,3/1,6-mannosyltransferase ALG2 OS=Homo sapiens OX=9606 GN=ALG2 PE=1 SV=1;;
TraesCS2A02G450500	NA
TraesCS2A02G450600	Xyloglucan galactosyltransferase KATAMARI1 homolog OS=Oryza sativa subsp. japonica OX=39947 GN=Os03g0144800 PE=2 SV=1;;
TraesCS2A02G577000	Serine/threonine-protein kinase STY8 OS=Arabidopsis thaliana OX=3702 GN=STY8 PE=1 SV=2;;
TraesCS2A02G577100	SKP1-interacting partner 15 OS=Arabidopsis thaliana OX=3702 GN=SKIP15 PE=1 SV=1;;
TraesCS2A02G577200	NA
TraesCS2A02G577300	Serine/threonine-protein kinase STY8 OS=Arabidopsis thaliana OX=3702 GN=STY8 PE=1 SV=2;;
TraesCS2A02G577400	Serine/threonine-protein kinase ATG1t OS=Arabidopsis thaliana OX=3702 GN=At1g49180 PE=2 SV=1;;
TraesCS2A02G577500	Putative pentatricopeptide repeat-containing protein At3g15130 OS=Arabidopsis thaliana OX=3702 GN=PCMP-H86 PE=3 SV=1;;
TraesCS2A02G577600	3-isopropylmalate dehydrogenase 2, chloroplastic OS=Arabidopsis thaliana OX=3702 GN=IMDH2 PE=1 SV=1;;
TraesCS2A02G577700	UPF0235 protein C15orf40 OS=Homo sapiens OX=9606 GN=C15orf40 PE=1 SV=2;;
TraesCS2A02G577800	Cytochrome P450 94A1 OS=Vicia sativa OX=3908 GN=CYP94A1 PE=2 SV=2;;
TraesCS2A02G577900	Glutathione S-transferase U20 OS=Arabidopsis thaliana OX=3702 GN=GSTU20 PE=1 SV=1;;
TraesCS2A02G578000	Glutathione S-transferase 3 OS=Glycine max OX=3847 GN=GST3 PE=1 SV=1;;
TraesCS2A02G578200	Probable glutathione S-transferase OS=Nicotiana tabacum OX=4097 PE=2 SV=1;;
TraesCS2A02G578300	Probable glutathione S-transferase OS=Nicotiana tabacum OX=4097 PE=2 SV=1;;
TraesCS2A02G578400	Glutathione S-transferase 3 OS=Glycine max OX=3847 GN=GST3 PE=1 SV=1;;
TraesCS2A02G578500	Cysteine proteinase inhibitor 8 OS=Oryza sativa subsp. japonica OX=39947 GN=Os03g0429000 PE=2 SV=1;;
TraesCS2A02G578600	NA
TraesCS2A02G578900	Putative cysteine-rich receptor-like protein kinase 12 OS=Arabidopsis thaliana OX=3702 GN=CRK12 PE=3 SV=3;;
TraesCS2A02G579100	NA
TraesCS2A02G579200	NA
TraesCS2A02G579300	Anthocyanidin reductase;;
TraesCS2A02G579400	Anthocyanidin reductase;;
TraesCS2A02G579500	Anthocyanidin reductase;;
TraesCS2A02G579600	Anthocyanidin reductase;;
TraesCS2A02G579700	Ent-isokaurene C2-hydroxylase OS=Oryza sativa subsp. japonica OX=39947 GN=CYP71Z6 PE=1 SV=1;;
TraesCS2A02G579800	NA
TraesCS2A02G579900	Putative disease resistance RPP13-like protein 1 OS=Arabidopsis thaliana OX=3702 GN=RPPL1 PE=3 SV=1;;
TraesCS2A02G580000	Probable LRR receptor-like serine/threonine-protein kinase At1g63430 OS=Arabidopsis thaliana OX=3702 GN=At1g63430 PE=2 SV=1;;
TraesCS2A02G580200	Putative expansin-B14 OS=Oryza sativa subsp. japonica OX=39947 GN=EXPB14 PE=3 SV=1;;
TraesCS2A02G580300	Putative expansin-B14 OS=Oryza sativa subsp. japonica OX=39947 GN=EXPB14 PE=3 SV=1;;
TraesCS2A02G580400	Putative disease resistance RPP13-like protein 3 OS=Arabidopsis thaliana OX=3702 GN=RPP13L3 PE=3 SV=1;;
TraesCS2A02G580500	Disease resistance RPP13-like protein 4 OS=Arabidopsis thaliana OX=3702 GN=RPP13L4 PE=1 SV=2;;
TraesCS2A02G580600	NA
TraesCS2A02G580700	NA
TraesCS2A02G580800	NA
TraesCS2A02G580900	G-type lectin S-receptor-like serine/threonine-protein kinase SD2-5 OS=Arabidopsis thaliana OX=3702 GN=SD25 PE=1 SV=1;;
TraesCS2A02G581000	NA
TraesCS2A02G581200	NA
TraesCS2A02G581300	NA
TraesCS2A02G581400	PH, RCC1 and FYVE domains-containing protein 1 OS=Arabidopsis thaliana OX=3702 GN=PRAF1 PE=1 SV=1;;
TraesCS2A02G581500	Cysteine proteinase inhibitor 8 OS=Oryza sativa subsp. japonica OX=39947 GN=Os03g0429000 PE=2 SV=1;;
TraesCS2A02G581600	Oxalate--CoA ligase OS=Arabidopsis thaliana OX=3702 GN=AAE3 PE=1 SV=1;;
TraesCS2A02G581700	Nucleobase-ascorbate transporter 6 OS=Arabidopsis thaliana OX=3702 GN=NAT6 PE=2 SV=2;;
TraesCS2A02G581800	NA
TraesCS2A02G581900	NA
TraesCS2A02G582000	FT-interacting protein 1 OS=Arabidopsis thaliana OX=3702 GN=FTIP1 PE=1 SV=1;;
TraesCS2A02G582100	Probable phospholipid hydroperoxide glutathione peroxidase OS=Spinacia oleracea OX=3562 PE=2 SV=1;;
TraesCS2A02G582200	Probable phospholipid hydroperoxide glutathione peroxidase OS=Spinacia oleracea OX=3562 PE=2 SV=1;;
TraesCS2A02G582300	AT-hook motif nuclear-localized protein 1 OS=Arabidopsis thaliana OX=3702 GN=AHL1 PE=1 SV=1;;
TraesCS2A02G582400	Wall-associated receptor kinase 4 OS=Arabidopsis thaliana OX=3702 GN=WAK4 PE=2 SV=1;;
TraesCS2A02G582500	Probable serine/threonine-protein kinase BSK3 OS=Oryza sativa subsp. japonica OX=39947 GN=BSK3 PE=1 SV=1;;
TraesCS2A02G582600	NA
TraesCS2A02G582700	Pentatricopeptide repeat-containing protein At5g04810, chloroplastic OS=Arabidopsis thaliana OX=3702 GN=PPR4 PE=1 SV=1;;
TraesCS2A02G582800	NA
TraesCS2A02G582900	31 kDa ribonucleoprotein, chloroplastic OS=Nicotiana sylvestris OX=4096 PE=1 SV=1;;
TraesCS2A02G583000	NA
TraesCS2A02G583100	NA
TraesCS2B02G322200	Zinc-finger homeodomain protein 8 OS=Oryza sativa subsp. japonica OX=39947 GN=ZHD8 PE=3 SV=1;;
TraesCS2B02G322300	Kinesin-like protein KIN-7E, chloroplastic OS=Oryza sativa subsp. japonica OX=39947 GN=KIN7E PE=3 SV=2;;
TraesCS2B02G322400	Probable L-ascorbate peroxidase 7, chloroplastic OS=Oryza sativa subsp. japonica OX=39947 GN=APX7 PE=2 SV=1;;
TraesCS2B02G322500	PsbP domain-containing protein 2, chloroplastic OS=Arabidopsis thaliana OX=3702 GN=PPD2 PE=1 SV=1;;
TraesCS2B02G322600	Amino-acid permease BAT1 homolog OS=Oryza sativa subsp. japonica OX=39947 GN=BAT1 PE=2 SV=1;;
TraesCS2B02G322700	NA
TraesCS2B02G322800	Glutathione S-transferase TCHQD OS=Arabidopsis thaliana OX=3702 GN=TCHQD PE=2 SV=1;;
TraesCS2B02G322900	Acyl-coenzyme A thioesterase 13 OS=Homo sapiens OX=9606 GN=ACOT13 PE=1 SV=1;;
TraesCS2B02G323000	NA
TraesCS2B02G323100	NA
TraesCS2B02G323200	NA
TraesCS2B02G323300	Pentatricopeptide repeat-containing protein At2g13600 OS=Arabidopsis thaliana OX=3702 GN=PCMP-E76 PE=3 SV=1;;
TraesCS2B02G323400	Pentatricopeptide repeat-containing protein At3g26540 OS=Arabidopsis thaliana OX=3702 GN=PCMP-A5 PE=2 SV=1;;
TraesCS2B02G323500	NAC domain-containing protein 104 OS=Arabidopsis thaliana OX=3702 GN=NAC104 PE=2 SV=1;;
TraesCS2B02G323600	U-box domain-containing protein 26 OS=Arabidopsis thaliana OX=3702 GN=PUB26 PE=2 SV=1;;
TraesCS2B02G323700	Mitogen-activated protein kinase kinase kinase 3 OS=Arabidopsis thaliana OX=3702 GN=MAPKKK3 PE=1 SV=1;;
TraesCS2B02G323800	NA
TraesCS2B02G323900	NA
TraesCS2B02G324000	Septin and tuftelin-interacting protein 1 homolog 1 OS=Arabidopsis thaliana OX=3702 GN=STIPL1 PE=1 SV=1;;
TraesCS2B02G324100	Uncharacterized protein C57A10.07 OS=Schizosaccharomyces pombe;;
TraesCS2B02G324200	Glycolipid transfer protein 3 OS=Arabidopsis thaliana OX=3702 GN=GLTP3 PE=2 SV=1;;
TraesCS2B02G324300	Zinc finger CCCH domain-containing protein 28 OS=Oryza sativa subsp. japonica OX=39947 GN=Os04g0438700 PE=2 SV=1;;
TraesCS2B02G324400	T-complex protein 11-like protein 1 OS=Homo sapiens OX=9606 GN=TCP11L1 PE=1 SV=1;;
TraesCS2B02G401800	NA
TraesCS2B02G401900	BRCA1-associated RING domain protein 1 OS=Arabidopsis thaliana OX=3702 GN=BARD1 PE=1 SV=1;;
TraesCS2B02G402000	NA
TraesCS2B02G402100	Protein ECERIFERUM 1 OS=Arabidopsis thaliana OX=3702 GN=CER1 PE=1 SV=1;;
TraesCS2B02G402200	Protein JASON OS=Arabidopsis thaliana OX=3702 GN=JASON PE=2 SV=1;;
TraesCS2B02G402300	Receptor homology region, transmembrane domain- and RING domain-containing protein 2 OS=Oryza sativa subsp. japonica OX=39947 GN=RMR1 PE=2 SV=2;;
TraesCS2B02G402400	Inositol transporter 4 OS=Arabidopsis thaliana OX=3702 GN=INT4 PE=1 SV=1;;
TraesCS2B02G402500	NA
TraesCS2B02G402600	Peroxygenase OS=Oryza sativa subsp. indica OX=39946 GN=PXG PE=1 SV=1;;
TraesCS2B02G402700	NA
TraesCS2B02G402800	Vacuolar-processing enzyme beta-isozyme 1 OS=Oryza sativa subsp. japonica OX=39947 GN=VPE1 PE=1 SV=1;;
TraesCS2B02G402900	NA
TraesCS2B02G403000	Beta-fructofuranosidase 1 OS=Zea mays OX=4577 GN=IVR1 PE=3 SV=1;;
TraesCS2B02G403100	Protein YABBY 5 OS=Oryza sativa subsp. japonica OX=39947 GN=YAB5 PE=2 SV=1;;
TraesCS2B02G403300	NA
TraesCS2B02G403400	NA
TraesCS2B02G403500	NA
TraesCS2B02G403600	Pathogenesis-related protein 1A OS=Nicotiana tabacum OX=4097 PE=1 SV=1;;
TraesCS2B02G403700	Pathogenesis-related protein PRMS OS=Zea mays OX=4577 GN=PRMS PE=2 SV=1;;
TraesCS2B02G403800	Auxin-responsive protein SAUR36 OS=Arabidopsis thaliana OX=3702 GN=SAUR36 PE=2 SV=1;;
TraesCS2B02G403900	NA
TraesCS2B02G404000	Vacuolar-processing enzyme beta-isozyme 1 OS=Oryza sativa subsp. japonica OX=39947 GN=VPE1 PE=1 SV=1;;
TraesCS2B02G404100	Cysteine-rich repeat secretory protein 15 OS=Arabidopsis thaliana OX=3702 GN=CRRSP15 PE=1 SV=1;;
TraesCS2B02G404200	Vacuolar-processing enzyme beta-isozyme 1 OS=Oryza sativa subsp. japonica OX=39947 GN=VPE1 PE=1 SV=1;;
TraesCS2B02G404300	Vacuolar-processing enzyme beta-isozyme 1 OS=Oryza sativa subsp. japonica OX=39947 GN=VPE1 PE=1 SV=1;;
TraesCS2B02G404400	Hsp70-Hsp90 organizing protein 3 OS=Arabidopsis thaliana OX=3702 GN=HOP3 PE=2 SV=1;;
TraesCS2B02G404500	NA
TraesCS2B02G404600	Elongation factor G-2, chloroplastic OS=Glycine max OX=3847 GN=fusA2 PE=3 SV=1;;
TraesCS2B02G404700	NA
TraesCS2B02G404800	Probable cysteine desulfurase OS=Staphylococcus aureus;;
TraesCS2B02G404900	Autophagy-related protein 13a OS=Arabidopsis thaliana OX=3702 GN=ATG13A PE=1 SV=1;;
TraesCS2B02G405000	NA
TraesCS2B02G405100	NA
TraesCS2B02G405200	NA
TraesCS2B02G405300	BRCT domain-containing protein At4g02110 OS=Arabidopsis thaliana OX=3702 GN=At4g02110 PE=4 SV=3;;
TraesCS2B02G405400	Lecithin-cholesterol acyltransferase-like 1 OS=Oryza sativa subsp. japonica OX=39947 GN=Os03g0232800 PE=2 SV=1;;
TraesCS2B02G405500	Metallothiol transferase FosB OS=Bacillus velezensis;;
TraesCS2B02G405600	NA;;
TraesCS2B02G405700	NA
TraesCS2B02G405800	NA
TraesCS2B02G405900	NA
TraesCS2B02G406000	NA
TraesCS2B02G406100	NA
TraesCS2B02G406200	NA
TraesCS2B02G406300	NA
TraesCS2B02G406400	GATA transcription factor 5 OS=Arabidopsis thaliana OX=3702 GN=GATA5 PE=2 SV=1;;
TraesCS2B02G406500	NA
TraesCS2B02G406600	NA
TraesCS2B02G406700	COBRA-like protein 7 OS=Oryza sativa subsp. japonica OX=39947 GN=BC1LP1 PE=3 SV=2;;
TraesCS2B02G565300	Cysteine-rich receptor-like protein kinase 7 OS=Arabidopsis thaliana OX=3702 GN=CRK7 PE=2 SV=1;;
TraesCS2B02G565400	NA
TraesCS2B02G565500	NA
TraesCS2B02G565700	Protein DETOXIFICATION 29 OS=Arabidopsis thaliana OX=3702 GN=DTX29 PE=1 SV=1;;
TraesCS2B02G565800	Syn-copalyl diphosphate synthase OS=Oryza sativa subsp. japonica OX=39947 GN=CPS4 PE=2 SV=1;;
TraesCS2B02G565900	NA
TraesCS2B02G566000	NA
TraesCS2B02G566100	Putative G-type lectin S-receptor-like serine/threonine-protein kinase At1g61610 OS=Arabidopsis thaliana OX=3702 GN=At1g61610 PE=3 SV=1;;
TraesCS2B02G566200	NA
TraesCS2B02G566500	Cytochrome P450 709B2 OS=Arabidopsis thaliana OX=3702 GN=CYP709B2 PE=2 SV=1;;
TraesCS2B02G566600	RING finger protein 44 OS=Mus musculus OX=10090 GN=Rnf44 PE=2 SV=1;;
TraesCS2B02G566700	RING finger protein 44 OS=Mus musculus OX=10090 GN=Rnf44 PE=2 SV=1;;
TraesCS2B02G566800	CBL-interacting protein kinase 22 OS=Oryza sativa subsp. japonica OX=39947 GN=CIPK22 PE=2 SV=1;;
TraesCS2B02G566900	G-type lectin S-receptor-like serine/threonine-protein kinase SD1-13 OS=Arabidopsis thaliana OX=3702 GN=SD113 PE=1 SV=2;;
TraesCS2B02G567000	Putative G-type lectin S-receptor-like serine/threonine-protein kinase At1g61610 OS=Arabidopsis thaliana OX=3702 GN=At1g61610 PE=3 SV=1;;
TraesCS2B02G567100	G-type lectin S-receptor-like serine/threonine-protein kinase At1g11330 OS=Arabidopsis thaliana OX=3702 GN=At1g11330 PE=1 SV=3;;
TraesCS2B02G567200	Protein FLOWERING LOCUS T OS=Arabidopsis thaliana OX=3702 GN=FT PE=1 SV=2;;
TraesCS2B02G567400	Protein FLOWERING LOCUS T OS=Arabidopsis thaliana OX=3702 GN=FT PE=1 SV=2;;
TraesCS2B02G567500	G-type lectin S-receptor-like serine/threonine-protein kinase B120 OS=Arabidopsis thaliana OX=3702 GN=B120 PE=2 SV=1;;
TraesCS2B02G567600	Superoxide dismutase [Mn] 3.1, mitochondrial OS=Zea mays OX=4577 GN=SODA.4 PE=2 SV=1;;
TraesCS2B02G567700	G-type lectin S-receptor-like serine/threonine-protein kinase B120 OS=Arabidopsis thaliana OX=3702 GN=B120 PE=2 SV=1;;
TraesCS2B02G567900	CBL-interacting protein kinase 22 OS=Oryza sativa subsp. japonica OX=39947 GN=CIPK22 PE=2 SV=1;;
TraesCS2B02G568000	Putative G-type lectin S-receptor-like serine/threonine-protein kinase At1g61610 OS=Arabidopsis thaliana OX=3702 GN=At1g61610 PE=3 SV=1;;
TraesCS2B02G568100	Cytosolic sulfotransferase 5 OS=Arabidopsis thaliana OX=3702 GN=SOT5 PE=1 SV=1;;
TraesCS2B02G568200	Cytosolic sulfotransferase 15 OS=Arabidopsis thaliana OX=3702 GN=SOT15 PE=1 SV=1;;
TraesCS2B02G568300	Cytosolic sulfotransferase 8 OS=Arabidopsis thaliana OX=3702 GN=SOT8 PE=2 SV=1;;
TraesCS2B02G568400	NA
TraesCS2B02G568500	Putative G-type lectin S-receptor-like serine/threonine-protein kinase At1g61610 OS=Arabidopsis thaliana OX=3702 GN=At1g61610 PE=3 SV=1;;
TraesCS2B02G568600	G-type lectin S-receptor-like serine/threonine-protein kinase B120 OS=Arabidopsis thaliana OX=3702 GN=B120 PE=2 SV=1;;
TraesCS2B02G568700	Transcription factor bHLH123 OS=Arabidopsis thaliana OX=3702 GN=BHLH123 PE=1 SV=1;;
TraesCS2B02G568800	Flavanone 3-dioxygenase 3 OS=Oryza sativa subsp. japonica OX=39947 GN=F3H-3 PE=1 SV=1;;
TraesCS2B02G568900	Flavanone 3-dioxygenase 3 OS=Oryza sativa subsp. japonica OX=39947 GN=F3H-3 PE=1 SV=1;;
TraesCS2B02G569000	Heavy metal-associated isoprenylated plant protein 39 OS=Arabidopsis thaliana OX=3702 GN=HIPP39 PE=2 SV=1;;
TraesCS2B02G569100	Heavy metal-associated isoprenylated plant protein 39 OS=Arabidopsis thaliana OX=3702 GN=HIPP39 PE=2 SV=1;;
TraesCS2B02G569200	Heavy metal-associated isoprenylated plant protein 39 OS=Arabidopsis thaliana OX=3702 GN=HIPP39 PE=2 SV=1;;
TraesCS2B02G569300	Heavy metal-associated isoprenylated plant protein 39 OS=Arabidopsis thaliana OX=3702 GN=HIPP39 PE=2 SV=1;;
TraesCS2B02G569400	Heavy metal-associated isoprenylated plant protein 39 OS=Arabidopsis thaliana OX=3702 GN=HIPP39 PE=2 SV=1;;
TraesCS2B02G569500	Heavy metal-associated isoprenylated plant protein 39 OS=Arabidopsis thaliana OX=3702 GN=HIPP39 PE=2 SV=1;;
TraesCS2B02G569700	NA
TraesCS2B02G569800	Heavy metal-associated isoprenylated plant protein 39 OS=Arabidopsis thaliana OX=3702 GN=HIPP39 PE=2 SV=1;;
TraesCS2B02G569900	F-box protein KIB4 OS=Arabidopsis thaliana OX=3702 GN=KIB4 PE=3 SV=1;;
TraesCS2B02G570000	Actin-related protein 8 OS=Oryza sativa subsp. indica OX=39946 GN=ARP8 PE=3 SV=1;;
TraesCS2B02G570100	Ubiquitin-conjugating enzyme E2 28 OS=Arabidopsis thaliana OX=3702 GN=UBC28 PE=1 SV=1;;
TraesCS2B02G570200	60S ribosomal protein L16, mitochondrial OS=Zea mays OX=4577 GN=RPL16 PE=3 SV=1;;
TraesCS2B02G570300	Regulatory protein RecX OS=Pseudomonas fluorescens;;
TraesCS2B02G570400	Plant cysteine oxidase 3 OS=Arabidopsis thaliana OX=3702 GN=PCO3 PE=1 SV=1;;
TraesCS2B02G570500	Phosphatidylinositol 4-kinase gamma 6 OS=Arabidopsis thaliana OX=3702 GN=PI4KG6 PE=2 SV=1;;
TraesCS2B02G570600	Uncharacterized protein At5g50100, chloroplastic OS=Arabidopsis thaliana OX=3702 GN=At5g50100 PE=1 SV=1;;
TraesCS2D02G106200	Vignain OS=Vigna mungo OX=3915 PE=1 SV=1;;
TraesCS2D02G106300	Thiamine pyrophosphokinase 2 OS=Oryza sativa subsp. japonica OX=39947 GN=TPK2 PE=2 SV=1;;
TraesCS2D02G106400	NA
TraesCS2D02G106500	NA
TraesCS2D02G106600	Probable potassium transporter 9 OS=Oryza sativa subsp. japonica OX=39947 GN=HAK9 PE=2 SV=1;;
TraesCS2D02G106700	NA
TraesCS2D02G106800	CBL-interacting protein kinase 2 OS=Oryza sativa subsp. japonica OX=39947 GN=CIPK2 PE=2 SV=1;;
TraesCS2D02G106900	CBL-interacting protein kinase 29 OS=Oryza sativa subsp. japonica OX=39947 GN=CIPK29 PE=2 SV=1;;
TraesCS2D02G107000	Protein MAIN-LIKE 1 OS=Arabidopsis thaliana OX=3702 GN=MAIL1 PE=2 SV=1;;
TraesCS2D02G107100	NA
TraesCS2D02G107200	WEB family protein At2g38370 OS=Arabidopsis thaliana OX=3702 GN=At2g38370 PE=2 SV=1;;
TraesCS2D02G107300	Cationic peroxidase 1 OS=Arachis hypogaea OX=3818 GN=PNC1 PE=1 SV=2;;
TraesCS2D02G107400	Peroxidase OS=Triticum aestivum OX=4565 PE=2 SV=1;;
TraesCS2D02G107500	Peroxidase 2 OS=Oryza sativa subsp. japonica OX=39947 GN=PRX112 PE=2 SV=1;;
TraesCS2D02G107600	Peroxidase 2 OS=Oryza sativa subsp. indica OX=39946 GN=PRX112 PE=3 SV=2;;
TraesCS2D02G107700	NA
TraesCS2D02G107800	Peroxidase 1 OS=Hordeum vulgare OX=4513 PE=2 SV=1;;
TraesCS2D02G108100	Peroxidase 2 OS=Oryza sativa subsp. indica OX=39946 GN=PRX112 PE=3 SV=2;;
TraesCS2D02G108200	Peroxidase 2 OS=Oryza sativa subsp. japonica OX=39947 GN=PRX112 PE=2 SV=1;;
TraesCS2D02G108300	Peroxidase 70 OS=Zea mays OX=4577 GN=PER70 PE=1 SV=1;;
TraesCS2D02G108400	NA
TraesCS2D02G108500	Peroxidase 2 OS=Oryza sativa subsp. indica OX=39946 GN=PRX112 PE=3 SV=2;;
TraesCS2D02G108600	Peroxidase 70 OS=Zea mays OX=4577 GN=PER70 PE=1 SV=1;;
TraesCS2D02G108700	NA
TraesCS2D02G108900	NA
TraesCS2D02G109000	60S ribosomal protein L19-2 OS=Arabidopsis thaliana OX=3702 GN=RPL19B PE=2 SV=1;;
TraesCS2D02G109100	NA
TraesCS2D02G109200	NA
TraesCS2D02G109300	Germin-like protein 1-2 OS=Oryza sativa subsp. japonica OX=39947 GN=Os01g0705100 PE=3 SV=1;;
TraesCS2D02G109400	Aspartyl protease family protein 2 OS=Arabidopsis thaliana OX=3702 GN=APF2 PE=2 SV=1;;
TraesCS2D02G109500	Aspartyl protease family protein 2 OS=Arabidopsis thaliana OX=3702 GN=APF2 PE=2 SV=1;;
TraesCS2D02G109600	Aspartyl protease family protein 2 OS=Arabidopsis thaliana OX=3702 GN=APF2 PE=2 SV=1;;
TraesCS2D02G109700	NA
TraesCS2D02G109800	Pectinesterase 1 OS=Citrus sinensis OX=2711 GN=PECS-1.1 PE=2 SV=1;;
TraesCS2D02G109900	Probable acyl-CoA dehydrogenase IBR3 OS=Arabidopsis thaliana OX=3702 GN=IBR3 PE=1 SV=1;;
TraesCS2D02G110000	Ethylene-responsive transcription factor RAP2-3 OS=Arabidopsis thaliana OX=3702 GN=RAP2-3 PE=1 SV=2;;
TraesCS2D02G110100	NA
TraesCS2D02G110200	NA
TraesCS2D02G110300	NA
TraesCS2D02G110400	NA
TraesCS2D02G110500	NA
TraesCS2D02G110600	NA
TraesCS2D02G110700	NA
TraesCS2D02G110800	ABC transporter G family member 11 OS=Arabidopsis thaliana OX=3702 GN=ABCG11 PE=1 SV=1;;
TraesCS2D02G110900	Pentatricopeptide repeat-containing protein At3g18020 OS=Arabidopsis thaliana OX=3702 GN=At3g18020 PE=2 SV=1;;
TraesCS2D02G111000	NA
TraesCS2D02G111100	60S ribosomal protein L22-2 OS=Arabidopsis thaliana OX=3702 GN=RPL22B PE=2 SV=1;;
TraesCS2D02G111200	UPF0235 protein At5g63440 OS=Arabidopsis thaliana OX=3702 GN=At5g63440 PE=1 SV=1;;
TraesCS2D02G111300	DNA-directed RNA polymerases II, IV and V subunit 8B OS=Arabidopsis thaliana OX=3702 GN=NRPB8B PE=1 SV=1;;
TraesCS2D02G111400	NA
TraesCS2D02G111500	NA
TraesCS2D02G111600	NA
TraesCS2D02G111700	NA
TraesCS2D02G111800	NA
TraesCS2D02G111900	NA
TraesCS2D02G154900	NA
TraesCS2D02G155000	NA
TraesCS2D02G155100	NA
TraesCS2D02G155200	[Pyruvate dehydrogenase;;
TraesCS2D02G155300	NA
TraesCS2D02G155400	NA
TraesCS2D02G155500	Protein CAJ1 OS=Saccharomyces cerevisiae;;
TraesCS2D02G155600	Pentatricopeptide repeat-containing protein At5g48910 OS=Arabidopsis thaliana OX=3702 GN=PCMP-H38 PE=2 SV=1;;
TraesCS2D02G155700	CBL-interacting protein kinase 21 OS=Oryza sativa subsp. japonica OX=39947 GN=CIPK21 PE=2 SV=2;;
TraesCS2D02G155900	Dirigent protein 5 OS=Arabidopsis thaliana OX=3702 GN=DIR5 PE=2 SV=1;;
TraesCS2D02G156100	Zinc finger protein 10 OS=Arabidopsis thaliana OX=3702 GN=ZFP10 PE=2 SV=1;;
TraesCS2D02G156200	DIMBOA UDP-glucosyltransferase BX9 OS=Zea mays OX=4577 GN=BX9 PE=1 SV=1;;
TraesCS2D02G156300	Dirigent protein 5 OS=Arabidopsis thaliana OX=3702 GN=DIR5 PE=2 SV=1;;
TraesCS2D02G156400	Dirigent protein 5 OS=Arabidopsis thaliana OX=3702 GN=DIR5 PE=2 SV=1;;
TraesCS2D02G156600	Dirigent protein 5 OS=Arabidopsis thaliana OX=3702 GN=DIR5 PE=2 SV=1;;
TraesCS2D02G156700	DNA annealing helicase and endonuclease ZRANB3 OS=Mus musculus OX=10090 GN=Zranb3 PE=1 SV=1;;
TraesCS2D02G156800	Probable transcription factor At3g04930 OS=Arabidopsis thaliana OX=3702 GN=At3g04930 PE=1 SV=1;;
TraesCS2D02G156900	H/ACA ribonucleoprotein complex subunit 4 OS=Arabidopsis thaliana OX=3702 GN=CBF5 PE=1 SV=1;;
TraesCS2D02G157000	H/ACA ribonucleoprotein complex subunit 4 OS=Arabidopsis thaliana OX=3702 GN=CBF5 PE=1 SV=1;;
TraesCS2D02G157300	Cytochrome P450 709B1 OS=Arabidopsis thaliana OX=3702 GN=CYP709B1 PE=2 SV=1;;
TraesCS2D02G157400	Cytochrome P450 709B2 OS=Arabidopsis thaliana OX=3702 GN=CYP709B2 PE=2 SV=1;;
TraesCS2D02G157500	Cytochrome P450 709B1 OS=Arabidopsis thaliana OX=3702 GN=CYP709B1 PE=2 SV=1;;
TraesCS2D02G157600	Cytochrome P450 709B1 OS=Arabidopsis thaliana OX=3702 GN=CYP709B1 PE=2 SV=1;;
TraesCS2D02G157800	Cytochrome P450 709B1 OS=Arabidopsis thaliana OX=3702 GN=CYP709B1 PE=2 SV=1;;
TraesCS2D02G157900	Cytochrome P450 709B2 OS=Arabidopsis thaliana OX=3702 GN=CYP709B2 PE=2 SV=1;;
TraesCS2D02G158200	Transcription factor MYB86 OS=Arabidopsis thaliana OX=3702 GN=MYB86 PE=2 SV=1;;
TraesCS2D02G158300	Transcription factor MYB86 OS=Arabidopsis thaliana OX=3702 GN=MYB86 PE=2 SV=1;;
TraesCS2D02G158400	Pectin acetylesterase 2 OS=Arabidopsis thaliana OX=3702 GN=PAE2 PE=2 SV=1;;
TraesCS2D02G158500	B3 domain-containing protein Os06g0194400 OS=Oryza sativa subsp. japonica OX=39947 GN=Os06g0194400 PE=2 SV=1;;
TraesCS2D02G158600	Uncharacterized protein C24B11.05 OS=Schizosaccharomyces pombe;;
TraesCS2D02G158700	NA
TraesCS2D02G158800	Ras-related protein RABA5a OS=Arabidopsis thaliana OX=3702 GN=RABA5A PE=1 SV=1;;
TraesCS2D02G159000	Putative F-box/LRR-repeat protein 23 OS=Arabidopsis thaliana OX=3702 GN=FBL23 PE=4 SV=1;;
TraesCS2D02G159100	Solute carrier family 25 member 44 OS=Pongo abelii OX=9601 GN=SLC25A44 PE=2 SV=2;;
TraesCS2D02G159200	NA
TraesCS2D02G159400	Protein DMP5 OS=Arabidopsis thaliana OX=3702 GN=DMP5 PE=2 SV=1;;
TraesCS2D02G235000	NA
TraesCS2D02G235100	WD40 repeat-containing protein HOS15 OS=Arabidopsis thaliana OX=3702 GN=HOS15 PE=2 SV=1;;
TraesCS2D02G235200	Actin-depolymerizing factor 9 OS=Oryza sativa subsp. japonica OX=39947 GN=ADF9 PE=2 SV=1;;
TraesCS2D02G235300	E3 ubiquitin protein ligase RIN2 OS=Arabidopsis thaliana OX=3702 GN=RIN2 PE=1 SV=1;;
TraesCS2D02G235400	NA
TraesCS2D02G235500	60S ribosomal protein L15-2 OS=Arabidopsis thaliana OX=3702 GN=RPL15B PE=2 SV=1;;
TraesCS2D02G587500	NA
TraesCS2D02G587700	60S ribosomal protein L28-1 OS=Arabidopsis thaliana OX=3702 GN=RPL28A PE=1 SV=1;;
TraesCS2D02G587800	NA
TraesCS2D02G587900	NA
TraesCS2D02G588000	Vacuolar iron transporter homolog 5 OS=Oryza sativa subsp. japonica OX=39947 GN=Os04g0686800 PE=2 SV=3;;
TraesCS2D02G588200	Serine/threonine-protein kinase STY8 OS=Arabidopsis thaliana OX=3702 GN=STY8 PE=1 SV=2;;
TraesCS2D02G588300	NA
TraesCS2D02G588400	NA
TraesCS2D02G588500	Putative pentatricopeptide repeat-containing protein At3g15130 OS=Arabidopsis thaliana OX=3702 GN=PCMP-H86 PE=3 SV=1;;
TraesCS2D02G588600	Serine/threonine-protein kinase ATG1t OS=Arabidopsis thaliana OX=3702 GN=At1g49180 PE=2 SV=1;;
TraesCS2D02G588700	Serine/threonine-protein kinase STY46 OS=Arabidopsis thaliana OX=3702 GN=STY46 PE=1 SV=1;;
TraesCS2D02G588762	Putative pentatricopeptide repeat-containing protein At3g15130 OS=Arabidopsis thaliana OX=3702 GN=PCMP-H86 PE=3 SV=1;;
TraesCS2D02G588800	NA
TraesCS2D02G588900	Putative pentatricopeptide repeat-containing protein At3g15130 OS=Arabidopsis thaliana OX=3702 GN=PCMP-H86 PE=3 SV=1;;
TraesCS2D02G589000	3-isopropylmalate dehydrogenase 2, chloroplastic OS=Arabidopsis thaliana OX=3702 GN=IMDH2 PE=1 SV=1;;
TraesCS2D02G589100	UPF0235 protein C15orf40 homolog OS=Mus musculus OX=10090 PE=1 SV=1;;
TraesCS2D02G589200	Cytochrome P450 94A1 OS=Vicia sativa OX=3908 GN=CYP94A1 PE=2 SV=2;;
TraesCS2D02G589300	Probable glutathione S-transferase OS=Nicotiana tabacum OX=4097 PE=2 SV=1;;
TraesCS2D02G589400	Probable glutathione S-transferase OS=Nicotiana tabacum OX=4097 PE=2 SV=1;;
TraesCS2D02G589600	Glutathione S-transferase 3 OS=Glycine max OX=3847 GN=GST3 PE=1 SV=1;;
TraesCS2D02G589700	Cysteine proteinase inhibitor 8 OS=Oryza sativa subsp. japonica OX=39947 GN=Os03g0429000 PE=2 SV=1;;
TraesCS2D02G589800	PH, RCC1 and FYVE domains-containing protein 1 OS=Arabidopsis thaliana OX=3702 GN=PRAF1 PE=1 SV=1;;
TraesCS2D02G589900	NA
TraesCS2D02G590100	Oryzain alpha chain OS=Oryza sativa subsp. japonica OX=39947 GN=Os04g0650000 PE=1 SV=2;;
TraesCS2D02G590200	Peroxisomal membrane protein 2 OS=Bos taurus OX=9913 GN=PXMP2 PE=2 SV=3;;
TraesCS2D02G590400	NA
TraesCS2D02G590500	NA
TraesCS2D02G590600	Probable LRR receptor-like serine/threonine-protein kinase At3g47570 OS=Arabidopsis thaliana OX=3702 GN=At3g47570 PE=2 SV=1;;
TraesCS2D02G590700	Putative disease resistance protein At1g50180 OS=Arabidopsis thaliana OX=3702 GN=At1g50180 PE=3 SV=2;;
TraesCS2D02G590800	Putative disease resistance RPP13-like protein 3 OS=Arabidopsis thaliana OX=3702 GN=RPP13L3 PE=3 SV=1;;
TraesCS2D02G590900	Putative disease resistance RPP13-like protein 3 OS=Arabidopsis thaliana OX=3702 GN=RPP13L3 PE=3 SV=1;;
TraesCS2D02G591000	G-type lectin S-receptor-like serine/threonine-protein kinase SD2-5 OS=Arabidopsis thaliana OX=3702 GN=SD25 PE=1 SV=1;;
TraesCS2D02G591100	NA
TraesCS2D02G591200	Putative disease resistance protein At1g50180 OS=Arabidopsis thaliana OX=3702 GN=At1g50180 PE=3 SV=2;;
TraesCS2D02G591300	Putative disease resistance RPP13-like protein 3 OS=Arabidopsis thaliana OX=3702 GN=RPP13L3 PE=3 SV=1;;
TraesCS2D02G591400	Probable disease resistance RPP8-like protein 4 OS=Arabidopsis thaliana OX=3702 GN=RPP8L4 PE=2 SV=1;;
TraesCS2D02G591600	Disease resistance protein RPP8 OS=Arabidopsis thaliana OX=3702 GN=RPP8 PE=1 SV=2;;
TraesCS2D02G591800	NA
TraesCS2D02G591900	Putative B3 domain-containing protein Os03g0621600 OS=Oryza sativa subsp. japonica OX=39947 GN=Os03g0621600 PE=3 SV=1;;
TraesCS2D02G592100	NA
TraesCS2D02G592300	NA
TraesCS2D02G592500	Pre-mRNA cleavage factor Im 25 kDa subunit 2 OS=Arabidopsis thaliana OX=3702 GN=CFIS2 PE=1 SV=1;;
TraesCS2D02G592700	NA
TraesCS2D02G592900	Putative expansin-B14 OS=Oryza sativa subsp. japonica OX=39947 GN=EXPB14 PE=3 SV=1;;
TraesCS2D02G593100	tRNA-specific adenosine deaminase TAD1 OS=Arabidopsis thaliana OX=3702 GN=TAD1 PE=1 SV=1;;
TraesCS2D02G593200	NA
TraesCS2D02G593300	NA
TraesCS2D02G593400	Phosphomannomutase OS=Triticum aestivum OX=4565 PE=2 SV=1;;
TraesCS2D02G593500	NA
TraesCS2D02G593600	F-box/FBD/LRR-repeat protein At5g22700 OS=Arabidopsis thaliana OX=3702 GN=At5g22700 PE=2 SV=2;;
TraesCS2D02G593800	FBD-associated F-box protein At1g66320 OS=Arabidopsis thaliana OX=3702 GN=At1g66320 PE=2 SV=1;;
TraesCS2D02G593900	Polyadenylate-binding protein 8 OS=Arabidopsis thaliana OX=3702 GN=PAB8 PE=1 SV=1;;
TraesCS2D02G594100	Mediator of RNA polymerase II transcription subunit 15a OS=Arabidopsis thaliana OX=3702 GN=MED15A PE=1 SV=1;;
TraesCS2D02G594200	Putative threonine aspartase OS=Arabidopsis thaliana OX=3702 GN=At4g00590 PE=2 SV=3;;
TraesCS2D02G594300	SART-1 family protein DOT2 OS=Arabidopsis thaliana OX=3702 GN=DOT2 PE=1 SV=1;;
TraesCS2D02G594500	ABC transporter E family member 2 OS=Arabidopsis thaliana OX=3702 GN=ABCE2 PE=2 SV=1;;
TraesCS2D02G594600	NA
TraesCS2D02G594700	E3 ubiquitin-protein ligase PUB24 OS=Arabidopsis thaliana OX=3702 GN=PUB24 PE=1 SV=1;;
TraesCS2D02G594800	Polyadenylate-binding protein 8 OS=Arabidopsis thaliana OX=3702 GN=PAB8 PE=1 SV=1;;
TraesCS2D02G594900	NA
TraesCS2D02G595000	Receptor protein kinase TMK1 OS=Arabidopsis thaliana OX=3702 GN=TMK1 PE=1 SV=1;;
TraesCS2D02G595100	Nudix hydrolase 26, chloroplastic OS=Arabidopsis thaliana OX=3702 GN=NUDT26 PE=1 SV=1;;
TraesCS2D02G595200	Putative disease resistance RPP13-like protein 3 OS=Arabidopsis thaliana OX=3702 GN=RPP13L3 PE=3 SV=1;;
TraesCS2D02G595300	Putative disease resistance RPP13-like protein 3 OS=Arabidopsis thaliana OX=3702 GN=RPP13L3 PE=3 SV=1;;
TraesCS2D02G595400	NA
TraesCS2D02G595500	Lysine histidine transporter-like 2 OS=Arabidopsis thaliana OX=3702 GN=At1g67640 PE=2 SV=1;;
TraesCS2D02G595600	NA;;
TraesCS2D02G595700	Protein YIF1A OS=Bos taurus OX=9913 GN=YIF1A PE=2 SV=1;;
TraesCS2D02G595900	NA
TraesCS2D02G596000	Exocyst complex component EXO70A1 OS=Arabidopsis thaliana OX=3702 GN=EXO70A1 PE=1 SV=1;;
TraesCS2D02G596200	NDR1/HIN1-like protein 1 OS=Arabidopsis thaliana OX=3702 GN=NHL1 PE=2 SV=1;;
TraesCS2D02G596300	NDR1/HIN1-like protein 10 OS=Arabidopsis thaliana OX=3702 GN=NHL10 PE=2 SV=1;;
TraesCS2D02G596400	NDR1/HIN1-like protein 10 OS=Arabidopsis thaliana OX=3702 GN=NHL10 PE=2 SV=1;;
TraesCS2D02G596600	Cytosolic sulfotransferase 8 OS=Arabidopsis thaliana OX=3702 GN=SOT8 PE=2 SV=1;;
TraesCS2D02G596800	Transcription repressor OFP13 OS=Arabidopsis thaliana OX=3702 GN=OFP13 PE=1 SV=1;;
TraesCS2D02G596900	Probable LRR receptor-like serine/threonine-protein kinase At3g47570 OS=Arabidopsis thaliana OX=3702 GN=At3g47570 PE=2 SV=1;;
TraesCS2D02G597000	Probable aspartyl protease At4g16563 OS=Arabidopsis thaliana OX=3702 GN=At4g16563 PE=2 SV=1;;
TraesCS2D02G597100	BTB/POZ and MATH domain-containing protein 2 OS=Arabidopsis thaliana OX=3702 GN=BPM2 PE=1 SV=1;;
TraesCS3B02G046000	Transcriptional regulator SUPERMAN OS=Arabidopsis thaliana OX=3702 GN=SUP PE=1 SV=1;;
TraesCS3B02G046100	Delt;;
TraesCS3B02G046200	Ankyrin repeat-containing protein At5g02620 OS=Arabidopsis thaliana OX=3702 GN=At5g02620 PE=1 SV=1;;
TraesCS3B02G046300	F-box protein At5g62510 OS=Arabidopsis thaliana OX=3702 GN=At5g62510 PE=2 SV=1;;
TraesCS3B02G046400	Putative F-box protein At1g47790 OS=Arabidopsis thaliana OX=3702 GN=At1g47790 PE=4 SV=1;;
TraesCS3B02G046500	Deoxyhypusine synthase OS=Musa acuminata OX=4641 GN=DHS PE=2 SV=1;;
TraesCS3B02G046700	Probable leucine-rich repeat receptor-like protein kinase At1g68400 OS=Arabidopsis thaliana OX=3702 GN=At1g68400 PE=2 SV=1;;
TraesCS3B02G046800	Eukaryotic translation initiation factor 4E-1 OS=Oryza sativa subsp. japonica OX=39947 GN=Os01g0970400 PE=2 SV=1;;
TraesCS3B02G047000	NA
TraesCS3B02G047200	NA
TraesCS3B02G047300	Plastidic glucose transporter 4 OS=Arabidopsis thaliana OX=3702 GN=At5g16150 PE=1 SV=2;;
TraesCS3B02G047400	NA
TraesCS3B02G047600	ABC transporter G family member 6 OS=Arabidopsis thaliana OX=3702 GN=ABCG6 PE=2 SV=1;;
TraesCS3B02G047700	NA
TraesCS3B02G047800	NA
TraesCS3B02G047900	Chloroplastic group IIB intron splicing facilitator CRS2, chloroplastic OS=Oryza sativa subsp. japonica OX=39947 GN=Os01g0132800 PE=2 SV=1;;
TraesCS3B02G048000	Zinc finger protein GIS3 OS=Arabidopsis thaliana OX=3702 GN=GIS3 PE=1 SV=1;;
TraesCS3B02G048100	Mediator of RNA polymerase II transcription subunit 22a OS=Arabidopsis thaliana OX=3702 GN=MED22A PE=1 SV=1;;
TraesCS3B02G048200	NA
TraesCS3B02G048300	NA
TraesCS3B02G048400	NA
TraesCS3B02G048600	16.6 kDa heat shock protein OS=Oryza sativa subsp. japonica OX=39947 GN=HSP16.6 PE=2 SV=1;;
TraesCS3B02G048800	17.9 kDa heat shock protein 2 OS=Oryza sativa subsp. japonica OX=39947 GN=HSP17.9B PE=2 SV=1;;
TraesCS3B02G048900	NADPH-dependent aldehyde reductase-like protein, chloroplastic OS=Arabidopsis thaliana OX=3702 GN=At3g03980 PE=3 SV=1;;
TraesCS3B02G049900	16.9 kDa class I heat shock protein 1 OS=Triticum aestivum OX=4565 GN=hsp16.9A PE=2 SV=1;;
TraesCS3B02G050000	NA
TraesCS3B02G050100	Putative E3 ubiquitin-protein ligase SINA-like 6 OS=Arabidopsis thaliana OX=3702 GN=At5g37870 PE=3 SV=1;;
TraesCS3B02G050200	E3 ubiquitin-protein ligase SINA-like 11 OS=Arabidopsis thaliana OX=3702 GN=At5g62800 PE=2 SV=2;;
TraesCS3B02G050300	UDP-glycosyltransferase 72B1 OS=Arabidopsis thaliana OX=3702 GN=UGT72B1 PE=1 SV=1;;
TraesCS3B02G050600	Disease resistance protein RGA2 OS=Solanum bulbocastanum OX=147425 GN=RGA2 PE=1 SV=1;;
TraesCS3B02G050700	E3 ubiquitin-protein ligase SINA-like 11 OS=Arabidopsis thaliana OX=3702 GN=At5g62800 PE=2 SV=2;;
TraesCS3B02G050800	NA
TraesCS3B02G050900	E3 ubiquitin-protein ligase SINA-like 11 OS=Arabidopsis thaliana OX=3702 GN=At5g62800 PE=2 SV=2;;
TraesCS3B02G051000	Expansin-A24 OS=Oryza sativa subsp. japonica OX=39947 GN=EXPA24 PE=2 SV=2;;
TraesCS3B02G051100	Expansin-A23 OS=Oryza sativa subsp. japonica OX=39947 GN=EXPA23.1 PE=2 SV=2;;
TraesCS3B02G051200	Expansin-A24 OS=Oryza sativa subsp. japonica OX=39947 GN=EXPA24 PE=2 SV=2;;
TraesCS3B02G051300	Expansin-A23 OS=Oryza sativa subsp. japonica OX=39947 GN=EXPA23.1 PE=2 SV=2;;
TraesCS3B02G051400	Expansin-A24 OS=Oryza sativa subsp. japonica OX=39947 GN=EXPA24 PE=2 SV=2;;
TraesCS3B02G051500	Expansin-A23 OS=Oryza sativa subsp. japonica OX=39947 GN=EXPA23.1 PE=2 SV=2;;
TraesCS3B02G051600	Expansin-A24 OS=Oryza sativa subsp. japonica OX=39947 GN=EXPA24 PE=2 SV=2;;
TraesCS3B02G051700	NA
TraesCS3B02G051800	Expansin-A24 OS=Oryza sativa subsp. japonica OX=39947 GN=EXPA24 PE=2 SV=2;;
TraesCS3B02G051900	Expansin-A24 OS=Oryza sativa subsp. japonica OX=39947 GN=EXPA24 PE=2 SV=2;;
TraesCS3B02G052000	Expansin-A23 OS=Oryza sativa subsp. japonica OX=39947 GN=EXPA23.1 PE=2 SV=2;;
TraesCS3B02G052100	NA
TraesCS3B02G052200	Heparan-alpha-glucosaminide N-acetyltransferase OS=Homo sapiens OX=9606 GN=HGSNAT PE=1 SV=2;;
TraesCS3B02G052300	Putative E3 ubiquitin-protein ligase SINA-like 6 OS=Arabidopsis thaliana OX=3702 GN=At5g37870 PE=3 SV=1;;
TraesCS3B02G052400	E3 ubiquitin-protein ligase SINA-like 7 OS=Arabidopsis thaliana OX=3702 GN=At5g37890 PE=2 SV=1;;
TraesCS3B02G052500	Jacalin-related lectin 19 OS=Arabidopsis thaliana OX=3702 GN=JAL19 PE=2 SV=1;;
TraesCS3B02G052600	Receptor kinase-like protein Xa21 OS=Oryza sativa subsp. japonica OX=39947 GN=XA21 PE=1 SV=1;;
TraesCS3B02G052700	E3 ubiquitin-protein ligase sina OS=Drosophila willistoni OX=7260 GN=sina PE=3 SV=1;;
TraesCS3B02G053058	Probable polyamine transporter At3g13620 OS=Arabidopsis thaliana OX=3702 GN=At3g13620 PE=2 SV=1;;
TraesCS3B02G053100	Jacalin-related lectin 19 OS=Arabidopsis thaliana OX=3702 GN=JAL19 PE=2 SV=1;;
TraesCS3B02G053200	Putative cyclin-dependent kinase F-2 OS=Oryza sativa subsp. japonica OX=39947 GN=CDKF-2 PE=3 SV=1;;
TraesCS3B02G053300	NA
TraesCS3B02G053400	Putative E3 ubiquitin-protein ligase SINA-like 6 OS=Arabidopsis thaliana OX=3702 GN=At5g37870 PE=3 SV=1;;
TraesCS3B02G053500	Putative E3 ubiquitin-protein ligase SINA-like 9 OS=Arabidopsis thaliana OX=3702 GN=At5g37910 PE=3 SV=1;;
TraesCS4A02G108700	Serine/threonine protein kinase OSK4 OS=Oryza sativa subsp. indica OX=39946 GN=OSK4 PE=3 SV=1;;
TraesCS4A02G108800	Serine/threonine protein kinase OSK4 OS=Oryza sativa subsp. indica OX=39946 GN=OSK4 PE=3 SV=1;;
TraesCS4A02G108900	Protein YIPF5 homolog OS=Dictyostelium discoideum OX=44689 GN=yipf5 PE=3 SV=1;;
TraesCS4A02G109000	Phosphoinositide phospholipase C 6 OS=Arabidopsis thaliana OX=3702 GN=PLC6 PE=2 SV=2;;
TraesCS4A02G109100	Rhodanese-like domain-containing protein 10 OS=Arabidopsis thaliana OX=3702 GN=STR10 PE=2 SV=1;;
TraesCS4A02G109200	Probable 2-oxoglutarate-dependent dioxygenase At3g111800 OS=Arabidopsis thaliana OX=3702 GN=At3g11180 PE=2 SV=1;;
TraesCS4B02G013000	NA
TraesCS4B02G013300	Disease resistance protein RPS2 OS=Arabidopsis thaliana OX=3702 GN=RPS2 PE=1 SV=1;;
TraesCS4B02G013400	Protein QUIRKY OS=Arabidopsis thaliana OX=3702 GN=QKY PE=2 SV=1;;
TraesCS4B02G013500	CCR4-NOT transcription complex subunit 3 OS=Homo sapiens OX=9606 GN=CNOT3 PE=1 SV=1;;
TraesCS4B02G013600	Probable xyloglucan galactosyltransferase GT19 OS=Arabidopsis thaliana OX=3702 GN=GT19 PE=2 SV=1;;
TraesCS4B02G013700	Serine carboxypeptidase-like 40 OS=Arabidopsis thaliana OX=3702 GN=SCPL40 PE=2 SV=2;;
TraesCS4B02G013800	Cationic amino acid transporter 2, vacuolar OS=Arabidopsis thaliana OX=3702 GN=CAT2 PE=1 SV=1;;
TraesCS4B02G014000	UDP-glycosyltransferase 73C6 OS=Arabidopsis thaliana OX=3702 GN=UGT73C6 PE=2 SV=1;;
TraesCS4B02G014100	Membrin-11 OS=Arabidopsis thaliana OX=3702 GN=MEMB11 PE=1 SV=1;;
TraesCS4B02G014200	Uncharacterized protein At3g03773 OS=Arabidopsis thaliana OX=3702 GN=At3g03773 PE=1 SV=1;;
TraesCS4B02G014300	NA
TraesCS4B02G014400	Ankyrin repeat domain-containing protein 50 OS=Homo sapiens OX=9606 GN=ANKRD50 PE=1 SV=4;;
TraesCS4B02G014700	5-methyltetrahydropteroyltriglutamate--homocysteine methyltransferase 1 OS=Oryza sativa subsp. japonica OX=39947 GN=Os12g0623900 PE=2 SV=1;;
TraesCS4B02G014900	Protein RESTRICTED TEV MOVEMENT 2 OS=Arabidopsis thaliana OX=3702 GN=RTM2 PE=1 SV=1;;
TraesCS4B02G015000	NA
TraesCS4B02G015100	GTPase ERA1, chloroplastic OS=Zea mays OX=4577 GN=ERA1 PE=2 SV=1;;
TraesCS4B02G015200	Cation/calcium exchanger 1 OS=Arabidopsis thaliana OX=3702 GN=CCX1 PE=2 SV=1;;
TraesCS4B02G015300	Non-specific phospholipase C4 OS=Arabidopsis thaliana OX=3702 GN=NPC4 PE=1 SV=1;;
TraesCS4B02G015400	NA
TraesCS4B02G015500	Glucan endo-1,3-beta-glucosidase 8 OS=Arabidopsis thaliana OX=3702 GN=At1g64760 PE=1 SV=2;;
TraesCS4B02G015700	TATA-binding protein 2 OS=Oryza sativa subsp. japonica OX=39947 GN=TBP2 PE=1 SV=2;;
TraesCS4B02G015800	Ferredoxin C 1, chloroplastic OS=Arabidopsis thaliana OX=3702 GN=FDC1 PE=1 SV=1;;
TraesCS4B02G016000	E3 ubiquitin ligase PQT3-like OS=Arabidopsis thaliana OX=3702 GN=At5g47430 PE=1 SV=1;;
TraesCS4B02G016100	Pre-rRNA-processing protein TSR2 OS=Saccharomyces cerevisiae;;
TraesCS4B02G016200	LOB domain-containing protein 4 OS=Arabidopsis thaliana OX=3702 GN=LBD4 PE=1 SV=1;;
TraesCS4B02G016400	NA
TraesCS4B02G016500	Auxin-responsive protein SAUR71 OS=Arabidopsis thaliana OX=3702 GN=SAUR71 PE=2 SV=1;;
TraesCS4B02G016800	NA
TraesCS4B02G017000	NA
TraesCS4B02G017100	Tubulin beta-8 chain OS=Oryza sativa subsp. japonica OX=39947 GN=TUBB8 PE=2 SV=1;;
TraesCS4B02G017200	NA
TraesCS4B02G017300	Zeamatin OS=Zea mays OX=4577 GN=Zlp PE=1 SV=2;;
TraesCS4B02G017400	Type IV inositol polyphosphate 5-phosphatase 7 OS=Arabidopsis thaliana OX=3702 GN=IP5P7 PE=1 SV=1;;
TraesCS4D02G032100	Oxalate oxidase 2 OS=Hordeum vulgare OX=4513 PE=2 SV=1;;
TraesCS4D02G032200	Oxalate oxidase 2 OS=Hordeum vulgare OX=4513 PE=2 SV=1;;
TraesCS4D02G032300	NA
TraesCS4D02G032400	NA
TraesCS4D02G032500	Oxalate oxidase 2 OS=Hordeum vulgare OX=4513 PE=2 SV=1;;
TraesCS4D02G032600	Nucleobase-ascorbate transporter LPE1 OS=Zea mays OX=4577 GN=LPE1 PE=1 SV=2;;
TraesCS4D02G032700	NA
TraesCS4D02G032800	NA
TraesCS4D02G032900	Lysine--tRNA ligase OS=Oryza sativa subsp. japonica OX=39947 GN=Os03g0586800 PE=2 SV=1;;
TraesCS4D02G033000	NA
TraesCS4D02G033100	Receptor-like kinase TMK3 OS=Arabidopsis thaliana OX=3702 GN=TMK3 PE=2 SV=1;;
TraesCS4D02G033200	Premnaspirodiene oxygenase OS=Hyoscyamus muticus OX=35626 GN=CYP71D55 PE=1 SV=1;;
TraesCS4D02G033300	NA
TraesCS4D02G033500	Chloride channel protein CLC-d OS=Arabidopsis thaliana OX=3702 GN=CLC-D PE=1 SV=2;;
TraesCS4D02G033700	Nuclear transcription factor Y subunit A-9 OS=Arabidopsis thaliana OX=3702 GN=NFYA9 PE=1 SV=1;;
TraesCS4D02G033800	Probable cytokinin riboside 5'-monophosphate phosphoribohydrolase LOG4 OS=Oryza sativa subsp. japonica OX=39947 GN=LOGL4 PE=3 SV=1;;
TraesCS4D02G033900	NA
TraesCS4D02G034000	Putative ABC1 protein At2g40090 OS=Arabidopsis thaliana OX=3702 GN=At2g40090 PE=2 SV=2;;
TraesCS4D02G034100	NA
TraesCS4D02G034200	Protein yippee-like OS=Solanum tuberosum OX=4113 PE=2 SV=1;;
TraesCS4D02G034300	Zinc finger CCCH domain-containing protein 24 OS=Oryza sativa subsp. japonica OX=39947 GN=Os03g0698800 PE=2 SV=1;;
TraesCS4D02G034500	Denticleless protein homolog A OS=Xenopus laevis OX=8355 GN=dtl-a PE=2 SV=1;;
TraesCS4D02G034700	Adenylosuccinate synthetase 2, chloroplastic OS=Oryza sativa subsp. japonica OX=39947 GN=PURA2 PE=2 SV=1;;
TraesCS4D02G034800	Adenylosuccinate synthetase 2, chloroplastic OS=Oryza sativa subsp. japonica OX=39947 GN=PURA2 PE=2 SV=1;;
TraesCS4D02G034900	N-terminal acetyltransferase B complex catalytic subunit NAA20 OS=Arabidopsis thaliana OX=3702 GN=NAA20 PE=1 SV=1;;
TraesCS4D02G035000	Multicopper oxidase LPR1 homolog 1 OS=Oryza sativa subsp. japonica OX=39947 GN=LPR1 PE=2 SV=1;;
TraesCS4D02G035100	Probable linoleate 9S-lipoxygenase 4 OS=Oryza sativa subsp. japonica OX=39947 GN=Os03g0700700 PE=2 SV=1;;
TraesCS4D02G035200	Linoleate 9S-lipoxygenase 1 OS=Hordeum vulgare OX=4513 GN=LOX1.1 PE=1 SV=2;;
TraesCS4D02G035400	NA
TraesCS4D02G035600	NA
TraesCS4D02G035700	NA
TraesCS4D02G035800	Pre-mRNA-splicing factor 18 OS=Bos taurus OX=9913 GN=PRPF18 PE=2 SV=1;;
TraesCS4D02G036000	Protein ETHYLENE-INSENSITIVE 2 OS=Oryza sativa subsp. japonica OX=39947 GN=EIN2 PE=2 SV=1;;
TraesCS4D02G036100	Elongation of fatty acids protein 3-like OS=Arabidopsis thaliana OX=3702 GN=HOS3 PE=2 SV=1;;
TraesCS4D02G036200	NA
TraesCS4D02G036600	Senescence-specific cysteine protease SAG39 OS=Oryza sativa subsp. indica OX=39946 GN=OsI_14861 PE=3 SV=1;;
TraesCS4D02G036700	Senescence-specific cysteine protease SAG39 OS=Oryza sativa subsp. indica OX=39946 GN=OsI_14861 PE=3 SV=1;;
TraesCS4D02G036800	Senescence-specific cysteine protease SAG39 OS=Oryza sativa subsp. indica OX=39946 GN=OsI_14861 PE=3 SV=1;;
TraesCS4D02G037000	Senescence-specific cysteine protease SAG39 OS=Oryza sativa subsp. indica OX=39946 GN=OsI_14861 PE=3 SV=1;;
TraesCS4D02G037100	Senescence-specific cysteine protease SAG39 OS=Oryza sativa subsp. indica OX=39946 GN=OsI_14861 PE=3 SV=1;;
TraesCS4D02G037400	Senescence-specific cysteine protease SAG39 OS=Oryza sativa subsp. indica OX=39946 GN=OsI_14861 PE=3 SV=1;;
TraesCS4D02G037500	Senescence-specific cysteine protease SAG39 OS=Oryza sativa subsp. indica OX=39946 GN=OsI_14861 PE=3 SV=1;;
TraesCS4D02G037600	Senescence-specific cysteine protease SAG39 OS=Oryza sativa subsp. japonica OX=39947 GN=SAG39 PE=2 SV=2;;
TraesCS4D02G037700	NA
TraesCS4D02G037800	UDP-glycosyltransferase 91B1 OS=Arabidopsis thaliana OX=3702 GN=UGT91B1 PE=2 SV=1;;
TraesCS4D02G037900	UDP-glycosyltransferase 91C1 OS=Arabidopsis thaliana OX=3702 GN=UGT91C1 PE=2 SV=1;;
TraesCS4D02G038000	NA
TraesCS4D02G038100	Tyrosine-sulfated glycopeptide receptor 1 OS=Arabidopsis thaliana OX=3702 GN=PSY1R PE=1 SV=1;;
TraesCS4D02G038200	Probable sugar phosphate/phosphate translocator At3g17430 OS=Arabidopsis thaliana OX=3702 GN=At3g17430 PE=1 SV=1;;
TraesCS4D02G038300	Eukaryotic peptide chain release factor subunit 1-3 OS=Arabidopsis thaliana OX=3702 GN=ERF1-3 PE=1 SV=1;;
TraesCS4D02G038400	NA
TraesCS4D02G038500	Beta-glucosidase 7 OS=Oryza sativa subsp. japonica OX=39947 GN=BGLU7 PE=1 SV=1;;
TraesCS4D02G038600	Beta-glucosidase 8 OS=Oryza sativa subsp. japonica OX=39947 GN=BGLU8 PE=1 SV=1;;
TraesCS4D02G038700	Zinc finger protein 593 homolog OS=Caenorhabditis elegans OX=6239 GN=Y56A3A.18 PE=3 SV=1;;
TraesCS4D02G038800	Protein OPAQUE10 OS=Zea mays OX=4577 GN=O10 PE=1 SV=1;;
TraesCS4D02G038900	Mitogen-activated protein kinase kinase kinase 1 OS=Arabidopsis thaliana OX=3702 GN=MEKK1 PE=1 SV=2;;
TraesCS4D02G039000	Uncharacterized membrane protein At4g09580 OS=Arabidopsis thaliana OX=3702 GN=At4g09580 PE=1 SV=1;;
TraesCS4D02G039100	NA
TraesCS4D02G039200	Probable plastid-lipid-associated protein 4, chloroplastic OS=Arabidopsis thaliana OX=3702 GN=PAP4 PE=1 SV=1;;
TraesCS4D02G039300	Histone-lysine N-methyltransferase ASHR1 OS=Arabidopsis thaliana OX=3702 GN=ASHR1 PE=1 SV=2;;
TraesCS4D02G039400	Probable serine/threonine-protein kinase mps1 OS=Dictyostelium discoideum OX=44689 GN=mps1 PE=3 SV=1;;
TraesCS4D02G039500	Oxysterol-binding protein-related protein 1C OS=Arabidopsis thaliana OX=3702 GN=ORP1C PE=2 SV=1;;
TraesCS4D02G039600	NA
TraesCS4D02G039700	Phosphatidylinositol 4-phosphate 5-kinase 1 OS=Arabidopsis thaliana OX=3702 GN=PIP5K1 PE=1 SV=1;;
TraesCS4D02G039800	NA
TraesCS4D02G039900	NA
TraesCS4D02G040000	RuvB-like protein 1 OS=Arabidopsis thaliana OX=3702 GN=RIN1 PE=1 SV=1;;
TraesCS4D02G040100	Transcription factor TEOSINTE BRANCHED 1 OS=Zea mays OX=4577 GN=TB1 PE=2 SV=2;;
TraesCS4D02G040200	Kinesin-like protein KIN-7D, mitochondrial OS=Arabidopsis thaliana OX=3702 GN=KIN7D PE=2 SV=1;;
TraesCS4D02G040300	Uncharacterized transporter AF_0788 OS=Archaeoglobus fulgidus;;
TraesCS4D02G040400	DELLA protein RHT-1 OS=Triticum aestivum OX=4565 GN=RHT1 PE=1 SV=1;;
TraesCS4D02G040500	NA
TraesCS4D02G040700	Outer envelope protein 64, chloroplastic OS=Arabidopsis thaliana OX=3702 GN=OEP64 PE=1 SV=1;;
TraesCS4D02G355800	Pollen allergen Phl p 1 OS=Phleum pratense OX=15957 GN=PHLPI PE=1 SV=1;;
TraesCS4D02G355900	SKP1-like protein 21 OS=Arabidopsis thaliana OX=3702 GN=ASK21 PE=2 SV=1;;
TraesCS4D02G356000	Pollen allergen Phl p 2 OS=Phleum pratense OX=15957 GN=PHLPII PE=1 SV=1;;
TraesCS4D02G356100	NA
TraesCS4D02G356200	Branched-chain amino acid aminotransferase 2, chloroplastic OS=Humulus lupulus OX=3486 GN=BCAT2 PE=1 SV=1;;
TraesCS4D02G356400	E3 ubiquitin-protein ligase SINA-like 10 OS=Arabidopsis thaliana OX=3702 GN=At5g37930 PE=2 SV=1;;
TraesCS4D02G356500	Putative F-box/FBD/LRR-repeat protein At5g22670 OS=Arabidopsis thaliana OX=3702 GN=At5g22670 PE=4 SV=1;;
TraesCS4D02G356600	Dehydrodolichyl diphosphate synthase 2 OS=Arabidopsis thaliana OX=3702 GN=At5g58770 PE=2 SV=2;;
TraesCS4D02G356700	NA
TraesCS4D02G356800	Protein PAIR1 OS=Oryza sativa subsp. japonica OX=39947 GN=PAIR1 PE=1 SV=1;;
TraesCS4D02G356900	NA
TraesCS4D02G357000	NA
TraesCS4D02G357200	Stem 28 kDa glycoprotein OS=Glycine max OX=3847 GN=VSPA PE=2 SV=1;;
TraesCS4D02G357300	Stem 28 kDa glycoprotein OS=Glycine max OX=3847 GN=VSPA PE=2 SV=1;;
TraesCS4D02G357500	NA
TraesCS4D02G357600	NA
TraesCS4D02G357700	E3 ubiquitin-protein ligase RFWD3 OS=Mus musculus OX=10090 GN=Rfwd3 PE=2 SV=1;;
TraesCS4D02G357800	Probable protein phosphatase 2C 31 OS=Oryza sativa subsp. japonica OX=39947 GN=Os03g0275100 PE=2 SV=1;;
TraesCS4D02G357900	BAG family molecular chaperone regulator 6 OS=Arabidopsis thaliana OX=3702 GN=BAG6 PE=1 SV=1;;
TraesCS4D02G358000	Dirigent protein 1 OS=Arabidopsis thaliana OX=3702 GN=DIR1 PE=2 SV=1;;
TraesCS4D02G358200	NA
TraesCS4D02G358300	Disease resistance RPP13-like protein 4 OS=Arabidopsis thaliana OX=3702 GN=RPP13L4 PE=1 SV=2;;
TraesCS4D02G358400	Probable disease resistance RPP8-like protein 2 OS=Arabidopsis thaliana OX=3702 GN=RPP8L2 PE=3 SV=1;;
TraesCS4D02G358500	Polyphenol oxidase, chloroplastic OS=Vitis vinifera OX=29760 PE=1 SV=1;;
TraesCS4D02G358700	Xyloglucan endotransglucosylase/hydrolase protein 31 OS=Arabidopsis thaliana OX=3702 GN=XTH31 PE=1 SV=2;;
TraesCS4D02G358900	Heat stress transcription factor C-2a OS=Oryza sativa subsp. japonica OX=39947 GN=HSFC2A PE=2 SV=1;;
TraesCS4D02G359000	DEAD-box ATP-dependent RNA helicase 50 OS=Oryza sativa subsp. japonica OX=39947 GN=Os03g0108600 PE=2 SV=2;;
TraesCS4D02G359100	Transcription factor MYB93 OS=Arabidopsis thaliana OX=3702 GN=MYB93 PE=1 SV=1;;
TraesCS4D02G359200	Polyphenol oxidase, chloroplastic OS=Vitis vinifera OX=29760 PE=1 SV=1;;
TraesCS4D02G359300	Dirigent protein 20 OS=Arabidopsis thaliana OX=3702 GN=DIR20 PE=2 SV=1;;
TraesCS4D02G359400	Tyrosine decarboxylase 3 OS=Petroselinum crispum OX=4043 GN=TYRDC-3 PE=2 SV=1;;
TraesCS4D02G359500	UDP-glycosyltransferase 85A1 OS=Arabidopsis thaliana OX=3702 GN=UGT85A1 PE=2 SV=1;;
TraesCS4D02G359700	Aromatic-L-amino-acid decarboxylase OS=Catharanthus roseus OX=4058 GN=TDC PE=2 SV=1;;
TraesCS4D02G359800	Tryptamine benzoyltransferase 1 OS=Oryza sativa subsp. japonica OX=39947 GN=TBT1 PE=1 SV=1;;
TraesCS4D02G359900	Lipid transfer protein EARLI 1 OS=Arabidopsis thaliana OX=3702 GN=EARLI1 PE=1 SV=1;;
TraesCS4D02G360100	pEARLI1-like lipid transfer protein 1 OS=Arabidopsis thaliana OX=3702 GN=AZI1 PE=1 SV=1;;
TraesCS4D02G360200	Scarecrow-like protein 6 OS=Arabidopsis thaliana OX=3702 GN=SCL6 PE=1 SV=1;;
TraesCS4D02G360300	Signal recognition particle receptor subunit alpha homolog OS=Drosophila melanogaster OX=7227 GN=Gtp-bp PE=1 SV=2;;
TraesCS4D02G360400	F-box protein At5g07610 OS=Arabidopsis thaliana OX=3702 GN=At5g07610 PE=2 SV=1;;
TraesCS4D02G360600	Transcription factor RAX2 OS=Arabidopsis thaliana OX=3702 GN=RAX2 PE=1 SV=1;;
TraesCS4D02G360700	Putrescine hydroxycinnamoyltransferase OS=Oryza sativa subsp. japonica OX=39947 GN=Os09g0544000 PE=1 SV=1;;
TraesCS4D02G360800	Flavin-containing monooxygenase FMO GS-OX-like 3 OS=Arabidopsis thaliana OX=3702 GN=At1g62620 PE=2 SV=2;;
TraesCS4D02G360900	Flavin-containing monooxygenase FMO GS-OX-like 2 OS=Arabidopsis thaliana OX=3702 GN=At1g12200 PE=2 SV=1;;
TraesCS4D02G361000	Flavin-containing monooxygenase FMO GS-OX-like 2 OS=Arabidopsis thaliana OX=3702 GN=At1g12200 PE=2 SV=1;;
TraesCS4D02G361100	NA
TraesCS4D02G361200	NA
TraesCS4D02G361300	Cation transporter HKT8 OS=Oryza sativa subsp. japonica OX=39947 GN=HKT8 PE=3 SV=1;;
TraesCS4D02G361500	Protein NRT1/ PTR FAMILY 6.3 OS=Arabidopsis thaliana OX=3702 GN=NPF6.3 PE=1 SV=1;;
TraesCS4D02G361600	G-type lectin S-receptor-like serine/threonine-protein kinase B120 OS=Arabidopsis thaliana OX=3702 GN=B120 PE=2 SV=1;;
TraesCS4D02G361700	Expansin-B7 OS=Oryza sativa subsp. japonica OX=39947 GN=EXPB7 PE=2 SV=1;;
TraesCS4D02G361800	NA
TraesCS4D02G361900	Expansin-B4 OS=Oryza sativa subsp. japonica OX=39947 GN=EXPB4 PE=2 SV=1;;
TraesCS4D02G362000	E3 ubiquitin-protein ligase RING1-like OS=Arabidopsis thaliana OX=3702 GN=At3g19950 PE=1 SV=1;;
TraesCS4D02G362100	B-box domain protein 31 OS=Arabidopsis thaliana OX=3702 GN=MIP1B PE=2 SV=1;;
TraesCS4D02G362200	30S ribosomal protein S19, chloroplastic OS=Hordeum vulgare OX=4513 GN=rps19 PE=3 SV=1;;
TraesCS4D02G362300	NA
TraesCS4D02G362400	CCR4-NOT transcription complex subunit 1 OS=Mus musculus OX=10090 GN=Cnot1 PE=1 SV=2;;
TraesCS4D02G362500	Caffeoyl-CoA O-methyltransferase 1 OS=Zea mays OX=4577 GN=CCOAOMT1 PE=2 SV=1;;
TraesCS4D02G362600	Pre-mRNA-splicing factor ATP-dependent RNA helicase DEAH1 OS=Arabidopsis thaliana OX=3702 GN=ESP3 PE=1 SV=1;;
TraesCS4D02G362800	GATA transcription factor 2 OS=Arabidopsis thaliana OX=3702 GN=GATA2 PE=2 SV=1;;
TraesCS4D02G362900	Metalloendoproteinase 1-MMP OS=Arabidopsis thaliana OX=3702 GN=1MMP PE=1 SV=1;;
TraesCS4D02G363100	Protein SRG1 OS=Arabidopsis thaliana OX=3702 GN=SRG1 PE=2 SV=1;;
TraesCS4D02G363200	S-norcoclaurine synthase 1 OS=Coptis japonica OX=3442 GN=NCS1 PE=1 SV=1;;
TraesCS4D02G363300	S-norcoclaurine synthase 1 OS=Coptis japonica OX=3442 GN=NCS1 PE=1 SV=1;;
TraesCS4D02G363400	NA
TraesCS4D02G363600	VAN3-binding protein OS=Arabidopsis thaliana OX=3702 GN=VAB PE=1 SV=1;;
TraesCS4D02G363700	Formyltetrahydrofolate deformylase 2, mitochondrial OS=Arabidopsis thaliana OX=3702 GN=PURU2 PE=1 SV=1;;
TraesCS4D02G363800	NA
TraesCS4D02G363900	Coatomer subunit alpha-3 OS=Oryza sativa subsp. japonica OX=39947 GN=Os09g0127800 PE=2 SV=1;;
TraesCS4D02G364000	Phosphatidylserine decarboxylase proenzyme 1, mitochondrial OS=Oryza sativa subsp. japonica OX=39947 GN=PSD1 PE=2 SV=1;;
TraesCS4D02G364100	Cell number regulator 6 OS=Zea mays OX=4577 GN=CNR6 PE=2 SV=1;;
TraesCS4D02G364200	NA
TraesCS4D02G364300	MEIOTIC F-BOX protein MOF OS=Oryza sativa subsp. japonica OX=39947 GN=MOF PE=1 SV=2;;
TraesCS4D02G364400	Transcription factor GHD7 OS=Oryza sativa subsp. japonica OX=39947 GN=GHD7 PE=1 SV=1;;
TraesCS5B02G037600	NA
TraesCS5B02G037700	NA
TraesCS5B02G037900	Protein kinase PINOID OS=Oryza sativa subsp. japonica OX=39947 GN=PID PE=2 SV=1;;
TraesCS5B02G038100	Protein ACCELERATED CELL DEATH 6 OS=Arabidopsis thaliana OX=3702 GN=ACD6 PE=1 SV=1;;
TraesCS5B02G038200	Putative F-box protein At5g52610 OS=Arabidopsis thaliana OX=3702 GN=At5g52610 PE=4 SV=1;;
TraesCS5B02G038300	Disease resistance protein RPM1 OS=Arabidopsis thaliana OX=3702 GN=RPM1 PE=1 SV=1;;
TraesCS5B02G038400	Uncharacterized protein At3g49140 OS=Arabidopsis thaliana OX=3702 GN=At3g49140 PE=1 SV=2;;
TraesCS5B02G038500	NA
TraesCS5B02G038600	Putrescine hydroxycinnamoyltransferase 1 OS=Oryza sativa subsp. japonica OX=39947 GN=PHT1 PE=2 SV=1;;
TraesCS5B02G038700	F-box/FBD/LRR-repeat protein At5g22700 OS=Arabidopsis thaliana OX=3702 GN=At5g22700 PE=2 SV=2;;
TraesCS5B02G038800	Aspartic proteinase Asp1 OS=Oryza sativa subsp. indica OX=39946 GN=ASP1 PE=2 SV=2;;
TraesCS5B02G038900	Ent-kaurenoic acid oxidase 1 OS=Hordeum vulgare OX=4513 GN=KAO1 PE=1 SV=1;;
TraesCS5B02G039000	NA
TraesCS5B02G039100	Protein NRT1/ PTR FAMILY 2.11 OS=Arabidopsis thaliana OX=3702 GN=NPF2.11 PE=1 SV=1;;
TraesCS5B02G039200	Ent-kaurenoic acid oxidase 1 OS=Hordeum vulgare OX=4513 GN=KAO1 PE=1 SV=1;;
TraesCS5B02G039300	F-box/FBD/LRR-repeat protein At5g22700 OS=Arabidopsis thaliana OX=3702 GN=At5g22700 PE=2 SV=2;;
TraesCS5B02G039500	Probable mediator of RNA polymerase II transcription subunit 19b OS=Arabidopsis thaliana OX=3702 GN=MED19B PE=2 SV=1;;
TraesCS5B02G039600	Hydroxyproline O-galactosyltransferase GALT2 OS=Arabidopsis thaliana OX=3702 GN=GALT2 PE=1 SV=1;;
TraesCS5B02G039700	60S ribosomal protein L36-2 OS=Arabidopsis thaliana OX=3702 GN=RPL36B PE=3 SV=1;;
TraesCS5B02G039800	Auxin response factor 25 OS=Oryza sativa subsp. japonica OX=39947 GN=ARF25 PE=2 SV=1;;
TraesCS5B02G039900	SEC1 family transport protein SLY1 OS=Oryza sativa subsp. japonica OX=39947 GN=SLY1 PE=2 SV=1;;
TraesCS5B02G040000	NA
TraesCS5B02G040100	NA
TraesCS5B02G040200	NA
TraesCS5B02G040300	NA
TraesCS5B02G040400	NA
TraesCS5B02G040500	NA
TraesCS5B02G040600	Protein WHAT'S THIS FACTOR 1 OS=Zea mays OX=4577 GN=WTF1 PE=1 SV=1;;
TraesCS5B02G040700	Bidirectional sugar transporter SWEET17 OS=Arabidopsis thaliana OX=3702 GN=SWEET17 PE=1 SV=2;;
TraesCS5B02G040800	Bidirectional sugar transporter SWEET17 OS=Arabidopsis thaliana OX=3702 GN=SWEET17 PE=1 SV=2;;
TraesCS5B02G040900	Peroxidase 5 OS=Vitis vinifera OX=29760 GN=GSVIVT00037159001 PE=1 SV=2;;
TraesCS5B02G041200	Glucan endo-1,3-beta-glucosidase 8 OS=Arabidopsis thaliana OX=3702 GN=At1g64760 PE=1 SV=2;;
TraesCS5B02G041300	NA
TraesCS5B02G041400	NA
TraesCS5B02G041500	NA
TraesCS5B02G041641	Pentatricopeptide repeat-containing protein At3g53700, chloroplastic OS=Arabidopsis thaliana OX=3702 GN=MEE40 PE=2 SV=1;;
TraesCS5B02G041700	NA
TraesCS5B02G041800	NA
TraesCS5B02G041900	Splicing factor U2af large subunit A OS=Oryza sativa subsp. japonica OX=39947 GN=U2AF65A PE=2 SV=2;;
TraesCS5B02G042000	NA
TraesCS5B02G043800	NA
TraesCS5B02G043900	NA
TraesCS5B02G044200	NA
TraesCS5B02G044300	Vacuolar fusion protein CCZ1 homolog OS=Oryza sativa subsp. japonica OX=39947 GN=CCZ1 PE=2 SV=1;;
TraesCS5B02G044400	NA
TraesCS5B02G044500	NA
TraesCS5B02G044600	NA
TraesCS5B02G044700	NA
TraesCS5B02G044900	F-box/FBD/LRR-repeat protein At1g13570 OS=Arabidopsis thaliana OX=3702 GN=At1g13570 PE=2 SV=1;;
TraesCS5B02G045100	Protein WIR1A OS=Triticum aestivum OX=4565 GN=WIR1A PE=4 SV=1;;
TraesCS5B02G045400	NA
TraesCS5B02G045500	Protein PLASTID MOVEMENT IMPAIRED 1 OS=Arabidopsis thaliana OX=3702 GN=PMI1 PE=1 SV=1;;
TraesCS5B02G045700	NA
TraesCS5B02G045900	Eukaryotic translation initiation factor 3 subunit A OS=Zea mays OX=4577 GN=TIF3A1 PE=2 SV=1;;
TraesCS5B02G046000	Outer envelope pore protein 16-2, chloroplastic OS=Arabidopsis thaliana OX=3702 GN=OEP162 PE=2 SV=1;;
TraesCS5B02G046100	Protein TRIGALACTOSYLDIACYLGLYCEROL 2, chloroplastic OS=Arabidopsis thaliana OX=3702 GN=TGD2 PE=1 SV=1;;
TraesCS5B02G046400	Glutamate receptor 2.8 OS=Arabidopsis thaliana OX=3702 GN=GLR2.8 PE=2 SV=2;;
TraesCS5B02G046500	Cationic amino acid transporter 1 OS=Arabidopsis thaliana OX=3702 GN=CAT1 PE=1 SV=1;;
TraesCS5B02G046600	Heavy metal-associated isoprenylated plant protein 45 OS=Arabidopsis thaliana OX=3702 GN=HIPP45 PE=3 SV=1;;
TraesCS5B02G046700	Alpha-latrotoxin-Lh1a;;
TraesCS5B02G046800	NA
TraesCS5B02G046900	NA
TraesCS5D02G540400	NA
TraesCS5D02G540500	Putative disease resistance protein RGA3 OS=Solanum bulbocastanum OX=147425 GN=RGA3 PE=2 SV=2;;
TraesCS5D02G540600	Putative disease resistance protein RGA3 OS=Solanum bulbocastanum OX=147425 GN=RGA3 PE=2 SV=2;;
TraesCS5D02G540700	NA
TraesCS5D02G540900	NA
TraesCS5D02G541000	NA
TraesCS5D02G541100	Cinnamoyl-CoA reductase 1 OS=Arabidopsis thaliana OX=3702 GN=CCR1 PE=1 SV=1;;
TraesCS5D02G541200	NA
TraesCS5D02G541400	NA
TraesCS5D02G541500	NA
TraesCS5D02G541600	NA
TraesCS5D02G541700	NA
TraesCS5D02G541800	NA
TraesCS5D02G541900	NA
TraesCS5D02G542000	NA
TraesCS5D02G542100	NA
TraesCS5D02G542200	NA
TraesCS5D02G542300	Elongation factor Tu, mitochondrial OS=Arabidopsis thaliana OX=3702 GN=TUFA PE=1 SV=1;;
TraesCS5D02G542400	Monothiol glutaredoxin-S7, chloroplastic OS=Oryza sativa subsp. japonica OX=39947 GN=GRXS7 PE=2 SV=1;;
TraesCS5D02G542500	Putative disease resistance protein RGA3 OS=Solanum bulbocastanum OX=147425 GN=RGA3 PE=2 SV=2;;
TraesCS5D02G542600	Receptor-like protein kinase At3g21340 OS=Arabidopsis thaliana OX=3702 GN=At3g21340 PE=1 SV=1;;
TraesCS5D02G542700	Receptor kinase-like protein Xa21 OS=Oryza sativa subsp. indica OX=39946 GN=XA21 PE=1 SV=1;;
TraesCS5D02G542800	Receptor kinase-like protein Xa21 OS=Oryza sativa subsp. indica OX=39946 GN=XA21 PE=1 SV=1;;
TraesCS5D02G542900	NA
TraesCS5D02G543000	Receptor kinase-like protein Xa21 OS=Oryza sativa subsp. indica OX=39946 GN=XA21 PE=1 SV=1;;
TraesCS5D02G543100	NA
TraesCS5D02G543200	F-box/FBD/LRR-repeat protein At5g22660 OS=Arabidopsis thaliana OX=3702 GN=At5g22660 PE=2 SV=1;;
TraesCS5D02G543300	Lecithin-cholesterol acyltransferase-like 1 OS=Oryza sativa subsp. japonica OX=39947 GN=Os03g0232800 PE=2 SV=1;;
TraesCS5D02G543400	NA
TraesCS5D02G543500	Cysteine-rich receptor-like protein kinase 10 OS=Arabidopsis thaliana OX=3702 GN=CRK10 PE=1 SV=3;;
TraesCS5D02G543600	26S proteasome non-ATPase regulatory subunit 12 homolog A OS=Arabidopsis thaliana OX=3702 GN=RPN5A PE=1 SV=1;;
TraesCS5D02G543700	NA
TraesCS5D02G543800	NA
TraesCS5D02G543900	NA
TraesCS5D02G544000	U2 small nuclear ribonucleoprotein A' OS=Arabidopsis thaliana OX=3702 GN=At1g09760 PE=2 SV=2;;
TraesCS5D02G544100	NA
TraesCS5D02G544200	Probable peptide/nitrate transporter At3g43790 OS=Arabidopsis thaliana OX=3702 GN=ZIFL2 PE=2 SV=2;;
TraesCS5D02G544300	Putative disease resistance protein RGA3 OS=Solanum bulbocastanum OX=147425 GN=RGA3 PE=2 SV=2;;
TraesCS5D02G544600	Cytochrome b6-f complex subunit 5 OS=Jasminum nudiflorum OX=126431 GN=petG PE=3 SV=1;;
TraesCS5D02G544700	Putative disease resistance protein RGA4 OS=Solanum bulbocastanum OX=147425 GN=RGA4 PE=2 SV=1;;
TraesCS5D02G544800	Protein FRIGIDA OS=Arabidopsis thaliana OX=3702 GN=FRI PE=1 SV=1;;
TraesCS5D02G544900	DNA repair RAD52-like protein 2, chloroplastic OS=Arabidopsis thaliana OX=3702 GN=RAD52-2 PE=1 SV=1;;
TraesCS5D02G545000	Probable peptide/nitrate transporter At3g43790 OS=Arabidopsis thaliana OX=3702 GN=ZIFL2 PE=2 SV=2;;
TraesCS5D02G545100	Uncharacterized WD repeat-containing protein alr2800 OS=Nostoc sp.;;
TraesCS5D02G545200	Ankyrin repeat domain-containing protein 2A OS=Arabidopsis thaliana OX=3702 GN=AKR2A PE=1 SV=2;;
TraesCS5D02G545300	Pentatricopeptide repeat-containing protein At2g35030, mitochondrial OS=Arabidopsis thaliana OX=3702 GN=PCMP-E15 PE=2 SV=1;;
TraesCS5D02G545400	Pentatricopeptide repeat-containing protein At2g35030, mitochondrial OS=Arabidopsis thaliana OX=3702 GN=PCMP-E15 PE=2 SV=1;;
TraesCS5D02G545500	Pantoate--beta-alanine ligase OS=Oryza sativa subsp. japonica OX=39947 GN=PANC PE=2 SV=2;;
TraesCS5D02G545700	Tropinone reductase homolog At2g29290 OS=Arabidopsis thaliana OX=3702 GN=At2g29290 PE=2 SV=1;;
TraesCS5D02G545800	Tropinone reductase homolog At1g07440 OS=Arabidopsis thaliana OX=3702 GN=At1g07440 PE=1 SV=1;;
TraesCS5D02G546000	NA
TraesCS5D02G546100	Protein transport protein Sec61 subunit alpha OS=Dictyostelium discoideum OX=44689 GN=sec61a PE=3 SV=1;;
TraesCS5D02G546200	NA
TraesCS5D02G546400	LRR receptor-like serine/threonine-protein kinase ERECTA OS=Arabidopsis thaliana OX=3702 GN=ERECTA PE=1 SV=1;;
TraesCS5D02G546500	Probable LRR receptor-like serine/threonine-protein kinase At3g47570 OS=Arabidopsis thaliana OX=3702 GN=At3g47570 PE=2 SV=1;;
TraesCS5D02G546600	Disease resistance protein RPM1 OS=Arabidopsis thaliana OX=3702 GN=RPM1 PE=1 SV=1;;
TraesCS5D02G546700	L-type lectin-domain containing receptor kinase IV.2 OS=Arabidopsis thaliana OX=3702 GN=LECRK42 PE=2 SV=1;;
TraesCS5D02G546900	Receptor kinase-like protein Xa21 OS=Oryza sativa subsp. japonica OX=39947 GN=XA21 PE=1 SV=1;;
TraesCS5D02G547000	NA
TraesCS5D02G547100	Putative disease resistance protein RGA3 OS=Solanum bulbocastanum OX=147425 GN=RGA3 PE=2 SV=2;;
TraesCS5D02G547200	Putative disease resistance RPP13-like protein 3 OS=Arabidopsis thaliana OX=3702 GN=RPP13L3 PE=3 SV=1;;
TraesCS5D02G547300	Receptor-like protein kinase 2 OS=Arabidopsis thaliana OX=3702 GN=RCH2 PE=1 SV=1;;
TraesCS5D02G547500	Probable LRR receptor-like serine/threonine-protein kinase At3g47570 OS=Arabidopsis thaliana OX=3702 GN=At3g47570 PE=2 SV=1;;
TraesCS5D02G547600	Probable LRR receptor-like serine/threonine-protein kinase At3g47570 OS=Arabidopsis thaliana OX=3702 GN=At3g47570 PE=2 SV=1;;
TraesCS5D02G547700	NA
TraesCS5D02G547800	Disease resistance protein RPM1 OS=Arabidopsis thaliana OX=3702 GN=RPM1 PE=1 SV=1;;
TraesCS5D02G548000	Receptor kinase-like protein Xa21 OS=Oryza sativa subsp. indica OX=39946 GN=XA21 PE=1 SV=1;;
TraesCS5D02G548100	Probable LRR receptor-like serine/threonine-protein kinase At3g47570 OS=Arabidopsis thaliana OX=3702 GN=At3g47570 PE=2 SV=1;;
TraesCS5D02G548300	Putative disease resistance RPP13-like protein 3 OS=Arabidopsis thaliana OX=3702 GN=RPP13L3 PE=3 SV=1;;
TraesCS6A02G075900	NA
TraesCS6A02G076000	NA
TraesCS6A02G076100	NA
TraesCS6A02G076200	NA
TraesCS6A02G076300	Serine/threonine-protein phosphatase BSL2 homolog OS=Oryza sativa subsp. japonica OX=39947 GN=BSL2 PE=2 SV=2;;
TraesCS6A02G076400	NA
TraesCS6A02G076500	NA
TraesCS6A02G076600	NA
TraesCS6A02G076700	Histone H4 OS=Flaveria trinervia OX=4227 GN=hh4 PE=3 SV=3;;
TraesCS6A02G076800	Defensin-like protein OS=Nelumbo nucifera OX=4432 PE=3 SV=1;;
TraesCS6A02G076900	NA
TraesCS6A02G077000	Xylanase inhibitor protein 1 OS=Triticum aestivum OX=4565 GN=XIPI PE=1 SV=2;;
TraesCS6A02G077100	NA
TraesCS6A02G077200	NA
TraesCS6A02G077300	NA
TraesCS6A02G077400	Beta-1,4-mannosyl-glycoprotein 4-beta-N-acetylglucosaminyltransferase OS=Rattus norvegicus OX=10116 GN=Mgat3 PE=1 SV=2;;
TraesCS6A02G077500	Uncharacterized protein At4g14100 OS=Arabidopsis thaliana OX=3702 GN=At4g14100 PE=2 SV=1;;
TraesCS6A02G077600	Putative F-box/LRR-repeat protein At5g02700 OS=Arabidopsis thaliana OX=3702 GN=At5g02700 PE=4 SV=1;;
TraesCS6A02G077700	F-box/FBD/LRR-repeat protein At1g13570 OS=Arabidopsis thaliana OX=3702 GN=At1g13570 PE=2 SV=1;;
TraesCS6A02G077800	NA
TraesCS6A02G077900	NA
TraesCS6A02G078000	Putative FBD-associated F-box protein At3g50710 OS=Arabidopsis thaliana OX=3702 GN=At3g50710 PE=4 SV=1;;
TraesCS6A02G078100	NA
TraesCS6A02G078200	NA
TraesCS6A02G078300	Aquaporin NIP3-3 OS=Oryza sativa subsp. japonica OX=39947 GN=NIP3-3 PE=2 SV=1;;
TraesCS6A02G078400	NA
TraesCS6A02G078500	NA
TraesCS6A02G078600	Pumilio homolog 23 OS=Arabidopsis thaliana OX=3702 GN=APUM23 PE=1 SV=1;;
TraesCS6A02G078700	G-type lectin S-receptor-like serine/threonine-protein kinase At2g19130 OS=Arabidopsis thaliana OX=3702 GN=At2g19130 PE=2 SV=1;;
TraesCS6A02G078800	Peroxisome biogenesis protein 16 OS=Arabidopsis thaliana OX=3702 GN=PEX16 PE=1 SV=1;;
TraesCS6A02G078900	NA
TraesCS6A02G079000	NADP-dependent D-sorbitol-6-phosphate dehydrogenase OS=Malus domestica OX=3750 GN=S6PDH PE=2 SV=1;;
TraesCS6A02G079100	UDP-glycosyltransferase 73B5 OS=Arabidopsis thaliana OX=3702 GN=UGT73B5 PE=2 SV=1;;
TraesCS6A02G079200	Subtilisin inhibitor CLSI-I OS=Canavalia lineata OX=28957 PE=1 SV=1;;
TraesCS6A02G079300	Subtilisin inhibitor 1 OS=Phaseolus angularis OX=3914 PE=1 SV=1;;
TraesCS6A02G079400	NA
TraesCS6A02G079500	Chymotrypsin inhibitor OS=Lumbricus terrestris OX=6398 PE=1 SV=2;;
TraesCS6A02G079600	NA
TraesCS6A02G079700	NA
TraesCS6A02G079800	NA
TraesCS6A02G080000	NA
TraesCS6A02G081000	NA
TraesCS6A02G081100	NA
TraesCS6A02G081200	NA
TraesCS6A02G081300	Probable helicase MAGATAMA 3 OS=Arabidopsis thaliana OX=3702 GN=MAA3 PE=2 SV=1;;
TraesCS6A02G081400	NA
TraesCS6A02G081500	NA
TraesCS6A02G081600	Putative pentatricopeptide repeat-containing protein At1g19290 OS=Arabidopsis thaliana OX=3702 GN=At1g19290 PE=3 SV=2;;
TraesCS6A02G081700	NA
TraesCS6A02G081800	Cytochrome P450 89A2 OS=Arabidopsis thaliana OX=3702 GN=CYP89A2 PE=2 SV=2;;
TraesCS6A02G081900	Cytochrome P450 89A2 OS=Arabidopsis thaliana OX=3702 GN=CYP89A2 PE=2 SV=2;;
TraesCS6A02G090600	NA
TraesCS6A02G090700	Ent-cassadiene hydroxylase OS=Oryza sativa subsp. japonica OX=39947 GN=CYP71Z7 PE=1 SV=1;;
TraesCS6A02G090800	Pentatricopeptide repeat-containing protein At4g01990, mitochondrial OS=Arabidopsis thaliana OX=3702 GN=At4g01990 PE=2 SV=1;;
TraesCS6A02G090900	Pentatricopeptide repeat-containing protein At1g60770 OS=Arabidopsis thaliana OX=3702 GN=At1g60770 PE=2 SV=1;;
TraesCS6A02G091000	Pentatricopeptide repeat-containing protein At4g01990, mitochondrial OS=Arabidopsis thaliana OX=3702 GN=At4g01990 PE=2 SV=1;;
TraesCS6A02G091100	NA
TraesCS6A02G091200	Pentatricopeptide repeat-containing protein At4g01990, mitochondrial OS=Arabidopsis thaliana OX=3702 GN=At4g01990 PE=2 SV=1;;
TraesCS6A02G091300	NA
TraesCS6A02G091400	NA
TraesCS6A02G091500	UBX domain-containing protein 6 OS=Homo sapiens OX=9606 GN=UBXN6 PE=1 SV=1;;
TraesCS6A02G091600	NA
TraesCS6A02G091700	NA
TraesCS6A02G091800	NA
TraesCS6A02G091900	NA
TraesCS6A02G092000	Replication protein A 32 kDa subunit B OS=Oryza sativa subsp. japonica OX=39947 GN=RPA2B PE=1 SV=1;;
TraesCS6A02G092100	NA
TraesCS6A02G092200	NA
TraesCS6A02G092300	Probable ATP synthase 24 kDa subunit, mitochondrial OS=Arabidopsis thaliana OX=3702 GN=At2g21870 PE=1 SV=1;;
TraesCS6A02G092400	Putative ripening-related protein 6 OS=Oryza sativa subsp. japonica OX=39947 GN=Os10g0489301 PE=3 SV=1;;
TraesCS6A02G092500	NA
TraesCS6A02G092600	NA
TraesCS6A02G092700	NA
TraesCS6A02G092800	NA
TraesCS6A02G092900	NA
TraesCS6A02G093000	Probable nicotianamine synthase 4 OS=Hordeum vulgare OX=4513 GN=NAS4 PE=2 SV=1;;
TraesCS6A02G093100	NA
TraesCS6A02G093200	Endoglucanase 11 OS=Oryza sativa subsp. japonica OX=39947 GN=GLU4 PE=2 SV=3;;
TraesCS6A02G093300	NA
TraesCS6A02G093400	NA
TraesCS6A02G093500	NA
TraesCS6A02G093600	NA
TraesCS6A02G093700	Chlorophyll a-b binding protein, chloroplastic OS=Triticum aestivum OX=4565 GN=WHAB1.6 PE=3 SV=1;;
TraesCS6A02G093800	NA
TraesCS6A02G093900	NA
TraesCS6A02G094000	NA
TraesCS6A02G094100	Chlorophyll a-b binding protein, chloroplastic OS=Triticum aestivum OX=4565 GN=WHAB1.6 PE=3 SV=1;;
TraesCS6A02G094200	Chlorophyll a-b binding protein M9, chloroplastic OS=Zea mays OX=4577 GN=CAB-M9 PE=2 SV=1;;
TraesCS6A02G094300	Chlorophyll a-b binding protein, chloroplastic OS=Triticum aestivum OX=4565 GN=WHAB1.6 PE=3 SV=1;;
TraesCS6A02G094400	Chlorophyll a-b binding protein, chloroplastic OS=Triticum aestivum OX=4565 GN=WHAB1.6 PE=3 SV=1;;
TraesCS6A02G094500	Chlorophyll a-b binding protein, chloroplastic OS=Triticum aestivum OX=4565 GN=WHAB1.6 PE=3 SV=1;;
TraesCS6A02G094600	Chlorophyll a-b binding protein, chloroplastic OS=Triticum aestivum OX=4565 GN=WHAB1.6 PE=3 SV=1;;
TraesCS6A02G094700	NA
TraesCS6A02G094800	NA
TraesCS6A02G094900	NA
TraesCS6A02G095000	Sphinganine C4-monooxygenase 1 OS=Arabidopsis thaliana OX=3702 GN=SBH1 PE=1 SV=1;;
TraesCS6A02G095100	F-box/LRR-repeat protein At3g03360 OS=Arabidopsis thaliana OX=3702 GN=At3g03360 PE=2 SV=2;;
TraesCS6A02G095200	NA
TraesCS6A02G095300	Pentatricopeptide repeat-containing protein At2g17140 OS=Arabidopsis thaliana OX=3702 GN=At2g17140 PE=2 SV=1;;
TraesCS6A02G095400	NA
TraesCS6A02G095500	RING-H2 finger protein ATL32 OS=Arabidopsis thaliana OX=3702 GN=ATL32 PE=2 SV=3;;
TraesCS6A02G095600	NA
TraesCS6A02G095700	NA
TraesCS6A02G095800	NA
TraesCS6A02G095900	NA
TraesCS6A02G096000	U11/U12 small nuclear ribonucleoprotein 65 kDa protein OS=Arabidopsis thaliana OX=3702 GN=SNRNP65 PE=1 SV=1;;
TraesCS6A02G096100	BRCT domain-containing protein At4g02110 OS=Arabidopsis thaliana OX=3702 GN=At4g02110 PE=4 SV=3;;
TraesCS6A02G096200	E3 ubiquitin-protein ligase MARCH3 OS=Rattus norvegicus OX=10116 GN=March3 PE=1 SV=1;;
TraesCS6A02G096300	NA
TraesCS6A02G096400	NA
TraesCS6A02G096500	Pentatricopeptide repeat-containing protein At4g04790, mitochondrial OS=Arabidopsis thaliana OX=3702 GN=At4g04790 PE=2 SV=2;;
TraesCS6A02G096600	Cyclin-T1-1 OS=Oryza sativa subsp. japonica OX=39947 GN=CYCT1-1 PE=3 SV=2;;
TraesCS6A02G103000	NA
TraesCS6A02G103100	NA
TraesCS6A02G103200	Kinesin-like protein KIN-7A OS=Oryza sativa subsp. japonica OX=39947 GN=KIN7A PE=2 SV=1;;
TraesCS6A02G103300	NA
TraesCS6A02G103400	Protein FLUORESCENT IN BLUE LIGHT, chloroplastic OS=Arabidopsis thaliana OX=3702 GN=FLU PE=1 SV=1;;
TraesCS6A02G103500	NA
TraesCS6A02G103600	Proline-rich protein 4 OS=Arabidopsis thaliana OX=3702 GN=PRP4 PE=2 SV=1;;
TraesCS6A02G103700	NA
TraesCS6A02G103800	NA
TraesCS6A02G103900	NA
TraesCS6A02G104000	NA
TraesCS6A02G104100	NA
TraesCS6A02G104200	NA
TraesCS6A02G104300	GDSL esterase/lipase At5g42170 OS=Arabidopsis thaliana OX=3702 GN=At5g42170/At5g42160 PE=3 SV=2;;
TraesCS6A02G104400	NA
TraesCS6A02G104600	IQ domain-containing protein IQM3 OS=Arabidopsis thaliana OX=3702 GN=IQM3 PE=2 SV=1;;
TraesCS6A02G104700	NA
TraesCS6A02G104800	WD repeat-containing protein 11 OS=Mus musculus OX=10090 GN=Wdr11 PE=1 SV=1;;
TraesCS6A02G104900	NA
TraesCS6A02G105000	Peroxisome biogenesis protein 5 OS=Arabidopsis thaliana OX=3702 GN=PEX5 PE=1 SV=1;;
TraesCS6A02G105100	NA
TraesCS6A02G105200	BTB/POZ and MATH domain-containing protein 2 OS=Arabidopsis thaliana OX=3702 GN=BPM2 PE=1 SV=1;;
TraesCS6A02G105400	50S ribosomal protein L3, chloroplastic;;
TraesCS6A02G105500	BTB/POZ and MATH domain-containing protein 3 OS=Arabidopsis thaliana OX=3702 GN=BPM3 PE=1 SV=1;;
TraesCS6A02G105600	BTB/POZ and MATH domain-containing protein 1 OS=Arabidopsis thaliana OX=3702 GN=BPM1 PE=1 SV=1;;
TraesCS6A02G105700	Jacalin-related lectin 3 OS=Arabidopsis thaliana OX=3702 GN=JAL3 PE=2 SV=1;;
TraesCS6A02G105800	Probable mannan synthase 2 OS=Oryza sativa subsp. japonica OX=39947 GN=CSLA2 PE=2 SV=2;;
TraesCS6A02G105900	Probable apyrase 6 OS=Arabidopsis thaliana OX=3702 GN=APY6 PE=2 SV=2;;
TraesCS6A02G106000	Protein HIGH ARSENIC CONTENT 1, mitochondrial OS=Arabidopsis thaliana OX=3702 GN=HAC1 PE=1 SV=1;;
TraesCS6A02G106100	NA
TraesCS6A02G106200	Tyrosine N-monooxygenase OS=Sorghum bicolor OX=4558 GN=CYP79A1 PE=1 SV=3;;
TraesCS6A02G106300	NA
TraesCS6A02G106400	Stress-associated endoplasmic reticulum protein 2 OS=Bos taurus OX=9913 GN=SERP2 PE=3 SV=1;;
TraesCS6A02G106500	Ent-kaurenoic acid oxidase 1 OS=Hordeum vulgare OX=4513 GN=KAO1 PE=1 SV=1;;
TraesCS6A02G106600	WAT1-related protein At5g64700 OS=Arabidopsis thaliana OX=3702 GN=At5g64700 PE=2 SV=1;;
TraesCS6A02G106700	NA
TraesCS6A02G106800	Protein NUCLEAR FUSION DEFECTIVE 4 OS=Arabidopsis thaliana OX=3702 GN=NFD4 PE=3 SV=1;;
TraesCS6A02G107000	NA
TraesCS6A02G107100	ABC transporter G family member 37 OS=Oryza sativa subsp. japonica OX=39947 GN=ABCG37 PE=2 SV=1;;
TraesCS6A02G107200	Spliceosome-associated protein 130 B OS=Arabidopsis thaliana OX=3702 GN=SAP130B PE=2 SV=1;;
TraesCS6A02G107300	Probable histone acetyltransferase HAC-like 1 OS=Oryza sativa subsp. japonica OX=39947 GN=Os02g0137500 PE=3 SV=2;;
TraesCS6A02G107400	Ribosomal RNA small subunit methyltransferase H OS=Protochlamydia amoebophila;;
TraesCS6A02G107500	G-type lectin S-receptor-like serine/threonine-protein kinase LECRK1 OS=Oryza sativa subsp. japonica OX=39947 GN=LECRK1 PE=2 SV=1;;
TraesCS6A02G107600	NA
TraesCS6A02G107700	Probable UDP-N-acetylglucosamine--peptide N-acetylglucosaminyltransferase SPINDLY OS=Hordeum vulgare OX=4513 GN=SPY PE=2 SV=1;;
TraesCS6A02G107900	Delta-aminolevulinic acid dehydratase, chloroplastic OS=Oryza sativa subsp. japonica OX=39947 GN=HEMB PE=2 SV=1;;
TraesCS6A02G108000	Leucine-rich repeat extensin-like protein 1 OS=Arabidopsis thaliana OX=3702 GN=LRX1 PE=1 SV=1;;
TraesCS6A02G198900	NADH dehydrogenase [ubiquinone] 1 beta subcomplex subunit 3-B OS=Arabidopsis thaliana OX=3702 GN=At1g14450 PE=3 SV=1;;
TraesCS6A02G199000	Probable protein phosphatase 2C 15 OS=Oryza sativa subsp. japonica OX=39947 GN=Os02g0567200 PE=2 SV=1;;
TraesCS6B02G175200	Probable thiamine biosynthetic bifunctional enzyme, chloroplastic OS=Oryza sativa subsp. japonica OX=39947 GN=Os12g0192500 PE=2 SV=2;;
TraesCS6B02G175300	NA
TraesCS6B02G175400	Putative methyltransferase At1g22800, mitochondrial OS=Arabidopsis thaliana OX=3702 GN=At1g22800 PE=1 SV=2;;
TraesCS6B02G175500	NA
TraesCS6B02G175600	Cinnamoyl-CoA reductase 1 OS=Arabidopsis thaliana OX=3702 GN=CCR1 PE=1 SV=1;;
TraesCS6B02G175700	Chorismate mutase 2 OS=Arabidopsis thaliana OX=3702 GN=CM2 PE=1 SV=1;;
TraesCS6B02G175800	Nucleoid-associated protein At2g24020, chloroplastic OS=Arabidopsis thaliana OX=3702 GN=STIC2 PE=1 SV=2;;
TraesCS6B02G175900	Probable N-acetyltransferase HLS1-like OS=Arabidopsis thaliana OX=3702 GN=At2g23060 PE=2 SV=1;;
TraesCS6B02G176100	Ubiquitin carboxyl-terminal hydrolase 2 OS=Arabidopsis thaliana OX=3702 GN=UCH2 PE=1 SV=1;;
TraesCS6B02G176200	Probable protein phosphatase 2C 11 OS=Oryza sativa subsp. japonica OX=39947 GN=Os02g0180000 PE=2 SV=1;;
TraesCS6B02G176300	L-gulonolactone oxidase 3 OS=Arabidopsis thaliana OX=3702 GN=GULLO3 PE=1 SV=1;;
TraesCS6B02G176400	Ubiquitin-60S ribosomal protein L40-2 OS=Arabidopsis thaliana OX=3702 GN=RPL40B PE=2 SV=2;;
TraesCS6B02G176600	Glyoxylate/succinic semialdehyde reductase 1 OS=Arabidopsis thaliana OX=3702 GN=GLYR1 PE=1 SV=1;;
TraesCS6B02G176700	Protein RRC1 OS=Arabidopsis thaliana OX=3702 GN=RRC1 PE=1 SV=1;;
TraesCS6B02G176800	Bidirectional sugar transporter SWEET2a OS=Sorghum bicolor OX=4558 GN=SWEET2A PE=3 SV=1;;
TraesCS6B02G176900	Uncharacterized protein L728 OS=Acanthamoeba polyphaga mimivirus OX=212035 GN=MIMI_L728 PE=4 SV=1;;
TraesCS6B02G177000	Autophagy-related protein 11 OS=Arabidopsis thaliana OX=3702 GN=ATG11 PE=1 SV=1;;
TraesCS6B02G177100	Heptahelical transmembrane protein ADIPOR2 OS=Oryza sativa subsp. japonica OX=39947 GN=ADIPOR2 PE=2 SV=1;;
TraesCS6B02G177200	Heptahelical transmembrane protein ADIPOR2 OS=Oryza sativa subsp. japonica OX=39947 GN=ADIPOR2 PE=2 SV=1;;
TraesCS6B02G307600	NA
TraesCS6B02G307700	NA
TraesCS6B02G307800	Protein transport protein SEC23 OS=Ustilago maydis;;
TraesCS6B02G307900	Acetolactate synthase small subunit 2, chloroplastic OS=Arabidopsis thaliana OX=3702 GN=At2g31810 PE=1 SV=1;;
TraesCS6B02G308000	AT-rich interactive domain-containing protein 3 OS=Arabidopsis thaliana OX=3702 GN=ARID3 PE=1 SV=1;;
TraesCS6B02G308100	Trafficking protein particle complex subunit 11 OS=Bos taurus OX=9913 GN=TRAPPC11 PE=2 SV=1;;
TraesCS6B02G308200	Ribose-phosphate pyrophosphokinase 4 OS=Oryza sativa subsp. japonica OX=39947 GN=Os02g0714600 PE=2 SV=1;;
TraesCS6B02G308300	Cysteine protease XCP1 OS=Arabidopsis thaliana OX=3702 GN=XCP1 PE=1 SV=1;;
TraesCS6B02G308400	Short-chain dehydrogenase/reductase family 42E member 1 OS=Homo sapiens OX=9606 GN=SDR42E1 PE=2 SV=2;;
TraesCS6B02G308500	NA
TraesCS6B02G308600	NA
TraesCS6B02G308700	Putative F-box/LRR-repeat protein At3g44810 OS=Arabidopsis thaliana OX=3702 GN=At3g44810 PE=4 SV=2;;
TraesCS6B02G308800	NA
TraesCS6B02G308900	Outer envelope pore protein 16-3, chloroplastic/mitochondrial OS=Arabidopsis thaliana OX=3702 GN=OEP163 PE=1 SV=1;;
TraesCS6B02G309000	NA
TraesCS6B02G309100	NA
TraesCS6B02G309200	NA
TraesCS6B02G309300	NA
TraesCS6B02G309400	Fatty acid desaturase DES2 OS=Sorghum bicolor OX=4558 GN=DES2 PE=2 SV=1;;
TraesCS6B02G309500	NA
TraesCS6B02G309600	Clustered mitochondria protein OS=Arabidopsis thaliana OX=3702 GN=FMT PE=2 SV=1;;
TraesCS6B02G309700	Pectinesterase inhibitor 8 OS=Oryza sativa subsp. japonica OX=39947 GN=PMEI8 PE=2 SV=1;;
TraesCS6B02G309800	NA
TraesCS6B02G309900	NA
TraesCS6B02G310000	NA
TraesCS6B02G310100	NA
TraesCS6B02G310200	Putative F-box/LRR-repeat protein 23 OS=Arabidopsis thaliana OX=3702 GN=FBL23 PE=4 SV=1;;
TraesCS6B02G310300	PRELI domain containing protein 3B OS=Rattus norvegicus OX=10116 GN=Prelid3b PE=1 SV=1;;
TraesCS6D02G048600	S;;
TraesCS6D02G048700	Putative serpin-Z12 OS=Oryza sativa subsp. japonica OX=39947 GN=Os01g0267300 PE=3 SV=1;;
TraesCS6D02G048800	Putative serpin-Z12 OS=Oryza sativa subsp. japonica OX=39947 GN=Os01g0267300 PE=3 SV=1;;
TraesCS6D02G048900	Alpha-galactosidase OS=Coffea arabica OX=13443 PE=1 SV=1;;
TraesCS6D02G049000	Putative serpin-Z12 OS=Oryza sativa subsp. japonica OX=39947 GN=Os01g0267300 PE=3 SV=1;;
TraesCS6D02G049100	Heat shock 70 kDa protein BIP1 OS=Oryza sativa subsp. japonica OX=39947 GN=BIP1 PE=1 SV=1;;
TraesCS6D02G049200	NA
TraesCS6D02G049300	Transcription factor IIIA OS=Arabidopsis thaliana OX=3702 GN=TFIIIA PE=1 SV=1;;
TraesCS6D02G049400	Putative pentatricopeptide repeat-containing protein At3g49142 OS=Arabidopsis thaliana OX=3702 GN=PCMP-H77 PE=3 SV=1;;
TraesCS6D02G049500	Probable metal-nicotianamine transporter YSL7 OS=Oryza sativa subsp. japonica OX=39947 GN=YSL7 PE=2 SV=1;;
TraesCS6D02G049600	Heavy metal-associated isoprenylated plant protein 27 OS=Arabidopsis thaliana OX=3702 GN=HIPP27 PE=1 SV=1;;
TraesCS6D02G049700	NA
TraesCS6D02G049800	Probable metal-nicotianamine transporter YSL8 OS=Oryza sativa subsp. japonica OX=39947 GN=YSL8 PE=2 SV=1;;
TraesCS6D02G049900	Probable metal-nicotianamine transporter YSL8 OS=Oryza sativa subsp. japonica OX=39947 GN=YSL8 PE=2 SV=1;;
TraesCS6D02G050000	NA
TraesCS6D02G050100	Dirigent protein 17 OS=Arabidopsis thaliana OX=3702 GN=DIR17 PE=2 SV=1;;
TraesCS6D02G050200	NA
TraesCS6D02G050300	NA
TraesCS6D02G050398	Wall-associated receptor kinase 3 OS=Arabidopsis thaliana OX=3702 GN=WAK3 PE=2 SV=2;;
TraesCS6D02G050400	Receptor-like protein EIX2 OS=Solanum lycopersicum OX=4081 GN=EIX2 PE=1 SV=2;;
TraesCS6D02G050500	Receptor-like protein EIX2 OS=Solanum lycopersicum OX=4081 GN=EIX2 PE=1 SV=2;;
TraesCS6D02G050600	Receptor-like protein 13 OS=Arabidopsis thaliana OX=3702 GN=RLP13 PE=3 SV=1;;
TraesCS6D02G050700	Receptor-like protein EIX2 OS=Solanum lycopersicum OX=4081 GN=EIX2 PE=1 SV=2;;
TraesCS6D02G050800	Receptor-like protein EIX2 OS=Solanum lycopersicum OX=4081 GN=EIX2 PE=1 SV=2;;
TraesCS6D02G050900	Wall-associated receptor kinase 3 OS=Arabidopsis thaliana OX=3702 GN=WAK3 PE=2 SV=2;;
TraesCS6D02G051000	Receptor-like protein EIX2 OS=Solanum lycopersicum OX=4081 GN=EIX2 PE=1 SV=2;;
TraesCS6D02G051100	Receptor-like protein EIX2 OS=Solanum lycopersicum OX=4081 GN=EIX2 PE=1 SV=2;;
TraesCS6D02G051200	Receptor-like protein EIX2 OS=Solanum lycopersicum OX=4081 GN=EIX2 PE=1 SV=2;;
TraesCS6D02G051300	NA
TraesCS6D02G051400	Zingiberene synthase OS=Sorghum bicolor OX=4558 GN=TPS1 PE=1 SV=2;;
TraesCS6D02G051500	NA
TraesCS6D02G051600	Transcription factor ILR3 OS=Arabidopsis thaliana OX=3702 GN=ILR3 PE=1 SV=1;;
TraesCS6D02G051700	NA
TraesCS6D02G051800	NA
TraesCS6D02G051900	Putative receptor-like protein kinase At3g47110 OS=Arabidopsis thaliana OX=3702 GN=At3g47110 PE=3 SV=1;;
TraesCS6D02G052000	NA
TraesCS6D02G052100	Phytosulfokine receptor 1 OS=Arabidopsis thaliana OX=3702 GN=PSKR1 PE=1 SV=4;;
TraesCS6D02G052200	Disease resistance RPP13-like protein 4 OS=Arabidopsis thaliana OX=3702 GN=RPP13L4 PE=1 SV=2;;
TraesCS6D02G052300	Putative FBD-associated F-box protein At5g56820 OS=Arabidopsis thaliana OX=3702 GN=At5g56820 PE=4 SV=2;;
TraesCS6D02G052400	BTB/POZ and MATH domain-containing protein 1 OS=Arabidopsis thaliana OX=3702 GN=BPM1 PE=1 SV=1;;
TraesCS6D02G052500	NA
TraesCS6D02G052600	NA
TraesCS6D02G052700	Premnaspirodiene oxygenase OS=Hyoscyamus muticus OX=35626 GN=CYP71D55 PE=1 SV=1;;
TraesCS6D02G052800	NA
TraesCS6D02G052900	NA
TraesCS6D02G053000	Putative DEAD-box ATP-dependent RNA helicase 33 OS=Arabidopsis thaliana OX=3702 GN=RH33 PE=3 SV=1;;
TraesCS6D02G053100	NA
TraesCS6D02G053200	NA
TraesCS6D02G053300	Putative F-box/FBD/LRR-repeat protein At5g56810 OS=Arabidopsis thaliana OX=3702 GN=At5g56810 PE=4 SV=1;;
TraesCS6D02G053400	NA
TraesCS6D02G053500	Remorin 4.1 OS=Oryza sativa subsp. japonica OX=39947 GN=REM4.1 PE=1 SV=1;;
TraesCS6D02G053600	DNA-directed RNA polymerase II subunit 4 OS=Arabidopsis thaliana OX=3702 GN=NRPB4 PE=1 SV=1;;
TraesCS6D02G053700	NA
TraesCS6D02G053800	NA
TraesCS6D02G053900	NA
TraesCS6D02G054000	MOB kinase activator-like 1A OS=Medicago sativa subsp. falcata OX=3878 GN=MOB1-A PE=2 SV=2;;
TraesCS6D02G054100	Protein LOW PSII ACCUMULATION 3, chloroplastic OS=Arabidopsis thaliana OX=3702 GN=LPA3 PE=1 SV=1;;
TraesCS6D02G054200	NA
TraesCS6D02G054300	GMP synthase [glutamine-hydrolyzing] OS=Aquifex aeolicus;;
TraesCS6D02G054400	Peroxidase 70 OS=Zea mays OX=4577 GN=PER70 PE=1 SV=1;;
TraesCS6D02G054500	Peroxidase 70 OS=Zea mays OX=4577 GN=PER70 PE=1 SV=1;;
TraesCS6D02G054600	Peroxidase 70 OS=Zea mays OX=4577 GN=PER70 PE=1 SV=1;;
TraesCS6D02G054700	NA
TraesCS6D02G054800	Peroxidase 70 OS=Zea mays OX=4577 GN=PER70 PE=1 SV=1;;
TraesCS6D02G054900	Peroxidase 70 OS=Zea mays OX=4577 GN=PER70 PE=1 SV=1;;
TraesCS6D02G055000	Pectinesterase inhibitor 12 OS=Arabidopsis thaliana OX=3702 GN=PMEI12 PE=2 SV=1;;
TraesCS6D02G055100	DELLA protein RGL2 OS=Arabidopsis thaliana OX=3702 GN=RGL2 PE=1 SV=2;;
TraesCS6D02G055200	NA
TraesCS6D02G055400	60S ribosomal protein L13-2 OS=Brassica napus OX=3708 PE=2 SV=1;;
TraesCS6D02G055500	AT-hook motif nuclear-localized protein 20 OS=Arabidopsis thaliana OX=3702 GN=AHL20 PE=2 SV=1;;
TraesCS6D02G055600	Nucleolar GTP-binding protein 1 OS=Homo sapiens OX=9606 GN=GTPBP4 PE=1 SV=3;;
TraesCS6D02G055700	NA
TraesCS6D02G055900	Acyl transferase 15 OS=Oryza sativa subsp. japonica OX=39947 GN=AT15 PE=2 SV=1;;
TraesCS6D02G056000	NA
TraesCS6D02G056100	NA
TraesCS6D02G056200	NA
TraesCS6D02G056300	NA
TraesCS6D02G056400	NA
TraesCS6D02G056500	NA
TraesCS6D02G056600	Wall-associated receptor kinase 2 OS=Arabidopsis thaliana OX=3702 GN=WAK2 PE=1 SV=1;;
TraesCS6D02G056700	NA
TraesCS6D02G056800	NA
TraesCS6D02G056900	NA
TraesCS6D02G057000	NA
TraesCS6D02G057100	NA
TraesCS6D02G057200	NA
TraesCS6D02G057300	NA
TraesCS6D02G057400	NA
TraesCS6D02G057500	NA
TraesCS6D02G057600	NA
TraesCS6D02G057700	Protein LURP-one-related 15 OS=Arabidopsis thaliana OX=3702 GN=At5g01750 PE=1 SV=1;;
TraesCS6D02G057800	Cytochrome P450 76M5 OS=Oryza sativa subsp. japonica OX=39947 GN=CYP76M5 PE=1 SV=1;;
TraesCS6D02G057900	Protein BONZAI 3 OS=Arabidopsis thaliana OX=3702 GN=BON3 PE=1 SV=1;;
TraesCS6D02G058000	NA
TraesCS6D02G058100	NA
TraesCS6D02G058200	Tol-Pal system protein TolB OS=Polaromonas sp.;;
TraesCS6D02G058300	NA
TraesCS6D02G058400	NA
TraesCS6D02G058500	NA
TraesCS6D02G058600	NA
TraesCS6D02G058700	Protein BTR1 OS=Arabidopsis thaliana OX=3702 GN=BTR1 PE=1 SV=1;;
TraesCS6D02G058800	NA
TraesCS6D02G058900	NA
TraesCS6D02G059100	NA
TraesCS6D02G059200	NA
TraesCS6D02G059300	NAC domain-containing protein 67 OS=Oryza sativa subsp. japonica OX=39947 GN=NAC067 PE=2 SV=1;;
TraesCS6D02G059400	NA
TraesCS6D02G059500	NA
TraesCS6D02G059600	NA
TraesCS6D02G355800	Vesicle-associated membrane protein 711 OS=Arabidopsis thaliana OX=3702 GN=VAMP711 PE=1 SV=2;;
TraesCS6D02G355900	Protein MAIN-LIKE 1 OS=Arabidopsis thaliana OX=3702 GN=MAIL1 PE=2 SV=1;;
TraesCS6D02G356000	Mannose-P-dolichol utilization defect 1 protein homolog 2 OS=Arabidopsis thaliana OX=3702 GN=At4g07390 PE=2 SV=1;;
TraesCS6D02G356100	Thioredoxin-like protein CDSP32, chloroplastic OS=Oryza sativa subsp. japonica OX=39947 GN=CDSP32 PE=2 SV=1;;
TraesCS6D02G356200	NA
TraesCS6D02G356300	NA
TraesCS6D02G356400	NA
TraesCS6D02G356500	Pentatricopeptide repeat-containing protein At2g26790, mitochondrial OS=Arabidopsis thaliana OX=3702 GN=At2g26790 PE=3 SV=1;;
TraesCS6D02G356600	Aspartic proteinase oryzasin-1 OS=Oryza sativa subsp. japonica OX=39947 GN=Os05g0567100 PE=2 SV=2;;
TraesCS6D02G356700	NA
TraesCS6D02G356800	NA
TraesCS6D02G356900	NA
TraesCS6D02G357000	NA
TraesCS6D02G357100	Ribonucleoside-diphosphate reductase large subunit OS=Arabidopsis thaliana OX=3702 GN=RNR1 PE=1 SV=1;;
TraesCS6D02G357200	Putative B3 domain-containing protein Os03g0621600 OS=Oryza sativa subsp. japonica OX=39947 GN=Os03g0621600 PE=3 SV=1;;
TraesCS6D02G357300	NA
TraesCS6D02G357400	AP-1 complex subunit gamma-1 OS=Arabidopsis thaliana OX=3702 GN=GAMMA-ADR PE=1 SV=1;;
TraesCS6D02G357500	Auxin-responsive protein IAA9 OS=Oryza sativa subsp. japonica OX=39947 GN=IAA9 PE=2 SV=1;;
TraesCS6D02G357600	NA
TraesCS6D02G357700	Transcription factor SPATULA OS=Arabidopsis thaliana OX=3702 GN=SPT PE=1 SV=1;;
TraesCS6D02G357800	NA
TraesCS6D02G357900	F-box/kelch-repeat protein At1g16250 OS=Arabidopsis thaliana OX=3702 GN=At1g16250 PE=2 SV=1;;
TraesCS6D02G358000	PAP-specific phosphatase HAL2-like OS=Arabidopsis thaliana OX=3702 GN=AHL PE=2 SV=1;;
TraesCS6D02G358100	Quinone oxidoreductase PIG3 OS=Homo sapiens OX=9606 GN=TP53I3 PE=1 SV=2;;
TraesCS6D02G358200	Quinone oxidoreductase PIG3 OS=Homo sapiens OX=9606 GN=TP53I3 PE=1 SV=2;;
TraesCS6D02G358300	NA
TraesCS6D02G358400	Acyltransferase-like protein At1g54570, chloroplastic OS=Arabidopsis thaliana OX=3702 GN=At1g54570 PE=1 SV=1;;
TraesCS6D02G358500	Uncharacterized protein sll0005 OS=Synechocystis sp.;;
TraesCS6D02G358600	Serine/threonine-protein kinase/endoribonuclease IRE1 OS=Oryza sativa subsp. japonica OX=39947 GN=IRE1 PE=1 SV=1;;
TraesCS6D02G358700	GATA transcription factor 8 OS=Arabidopsis thaliana OX=3702 GN=GATA8 PE=2 SV=1;;
TraesCS6D02G358800	NA
TraesCS6D02G358900	Photosystem II 10 kDa polypeptide, chloroplastic OS=Hordeum vulgare OX=4513 GN=PSBR PE=3 SV=1;;
TraesCS6D02G359000	mRNA-decapping enzyme subunit 2 OS=Arabidopsis thaliana OX=3702 GN=DCP2 PE=1 SV=1;;
TraesCS6D02G359100	Probable LRR receptor-like serine/threonine-protein kinase At3g47570 OS=Arabidopsis thaliana OX=3702 GN=At3g47570 PE=2 SV=1;;
TraesCS6D02G359200	NA
TraesCS6D02G359300	NA
TraesCS6D02G359400	Probable 2-oxoglutarate-dependent dioxygenase At3g111800 OS=Arabidopsis thaliana OX=3702 GN=At3g11180 PE=2 SV=1;;
TraesCS6D02G359500	Mitochondrial metalloendopeptidase OMA1 OS=Schizosaccharomyces pombe;;
TraesCS6D02G359600	Protein SRG1 OS=Arabidopsis thaliana OX=3702 GN=SRG1 PE=2 SV=1;;
TraesCS6D02G359700	Protein SRG1 OS=Arabidopsis thaliana OX=3702 GN=SRG1 PE=2 SV=1;;
TraesCS6D02G359800	Agmatine coumaroyltransferase-2 OS=Hordeum vulgare OX=4513 GN=ACT-2 PE=1 SV=1;;
TraesCS6D02G359900	Clathrin interactor EPSIN 2 OS=Arabidopsis thaliana OX=3702 GN=EPSIN2 PE=1 SV=1;;
TraesCS6D02G360000	E3 ubiquitin-protein ligase WAV3 OS=Arabidopsis thaliana OX=3702 GN=WAV3 PE=1 SV=1;;
TraesCS6D02G360200	Glucan endo-1,3-beta-glucosidase 8 OS=Arabidopsis thaliana OX=3702 GN=At1g64760 PE=1 SV=2;;
TraesCS6D02G360300	FBD-associated F-box protein At5g18780 OS=Arabidopsis thaliana OX=3702 GN=At5g18780 PE=2 SV=2;;
TraesCS6D02G360400	Deoxyhypusine hydroxylase-B OS=Oryza sativa subsp. japonica OX=39947 GN=Os12g0626100 PE=2 SV=1;;
TraesCS6D02G360500	Uncharacterized protein At1g10890 OS=Arabidopsis thaliana OX=3702 GN=At1g10890 PE=4 SV=1;;
TraesCS6D02G360600	NA
TraesCS6D02G360700	Cell division control protein 48 homolog A OS=Arabidopsis thaliana OX=3702 GN=CDC48A PE=1 SV=1;;
TraesCS6D02G360800	Phosphoenolpyruvate carboxylase kinase 1 OS=Arabidopsis thaliana OX=3702 GN=PPCK1 PE=1 SV=1;;
TraesCS6D02G360900	Phosphoenolpyruvate carboxylase kinase 1 OS=Arabidopsis thaliana OX=3702 GN=PPCK1 PE=1 SV=1;;
TraesCS6D02G361000	Wall-associated receptor kinase 1 OS=Arabidopsis thaliana OX=3702 GN=WAK1 PE=1 SV=2;;
TraesCS6D02G361100	Wall-associated receptor kinase 2 OS=Arabidopsis thaliana OX=3702 GN=WAK2 PE=1 SV=1;;
TraesCS6D02G361300	NA
TraesCS6D02G361400	Wall-associated receptor kinase 2 OS=Arabidopsis thaliana OX=3702 GN=WAK2 PE=1 SV=1;;
TraesCS6D02G361500	Laccase-19 OS=Oryza sativa subsp. japonica OX=39947 GN=LAC19 PE=2 SV=1;;
TraesCS6D02G361600	Laccase-19 OS=Oryza sativa subsp. japonica OX=39947 GN=LAC19 PE=2 SV=1;;
TraesCS6D02G361700	Wall-associated receptor kinase 2 OS=Arabidopsis thaliana OX=3702 GN=WAK2 PE=1 SV=1;;
TraesCS6D02G361800	NA
TraesCS6D02G361900	Protein G1-like6 OS=Oryza sativa subsp. japonica OX=39947 GN=G1L6 PE=1 SV=1;;
TraesCS6D02G362000	NA
TraesCS6D02G362100	Wall-associated receptor kinase 2 OS=Arabidopsis thaliana OX=3702 GN=WAK2 PE=1 SV=1;;
TraesCS6D02G362117	Wall-associated receptor kinase 3 OS=Arabidopsis thaliana OX=3702 GN=WAK3 PE=2 SV=2;;
TraesCS6D02G362200	Wall-associated receptor kinase 5 OS=Arabidopsis thaliana OX=3702 GN=WAK5 PE=2 SV=1;;
TraesCS6D02G362222	Wall-associated receptor kinase 5 OS=Arabidopsis thaliana OX=3702 GN=WAK5 PE=2 SV=1;;
TraesCS6D02G362300	Wall-associated receptor kinase 3 OS=Arabidopsis thaliana OX=3702 GN=WAK3 PE=2 SV=2;;
TraesCS6D02G362400	ABC transporter I family member 19 OS=Arabidopsis thaliana OX=3702 GN=ABCI19 PE=2 SV=1;;
TraesCS6D02G362500	Casein kinase 1-like protein 10 OS=Arabidopsis thaliana OX=3702 GN=CKL10 PE=2 SV=1;;
TraesCS6D02G362600	Diphthine--ammonia ligase OS=Schizosaccharomyces pombe;;
TraesCS6D02G362700	TBC1 domain family member 15 OS=Mus musculus OX=10090 GN=Tbc1d15 PE=1 SV=1;;
TraesCS6D02G362800	NAC domain-containing protein 100 OS=Arabidopsis thaliana OX=3702 GN=NAC100 PE=2 SV=1;;
TraesCS6D02G362900	NAC domain-containing protein 79 OS=Arabidopsis thaliana OX=3702 GN=NAC079 PE=2 SV=1;;
TraesCS6D02G363000	NA
TraesCS6D02G363100	Cytochrome P450 72A15 OS=Arabidopsis thaliana OX=3702 GN=CYP72A15 PE=2 SV=1;;
TraesCS6D02G363200	Cysteine-rich receptor-like protein kinase 10 OS=Oryza sativa subsp. japonica OX=39947 GN=CRK10 PE=2 SV=1;;
TraesCS6D02G363300	Cysteine-rich receptor-like protein kinase 19 OS=Arabidopsis thaliana OX=3702 GN=CRK19 PE=2 SV=2;;
TraesCS6D02G363400	Kinesin-like protein KIN-10A OS=Oryza sativa subsp. japonica OX=39947 GN=KIN10A PE=2 SV=1;;
TraesCS6D02G363500	NA
TraesCS6D02G363600	NA
TraesCS6D02G363700	Kinesin-like protein KIN-10A OS=Oryza sativa subsp. japonica OX=39947 GN=KIN10A PE=2 SV=1;;
TraesCS6D02G363800	Ankyrin repeat domain-containing protein 13B OS=Homo sapiens OX=9606 GN=ANKRD13B PE=1 SV=4;;
TraesCS6D02G363900	Amino acid permease 6 OS=Arabidopsis thaliana OX=3702 GN=AAP6 PE=1 SV=1;;
TraesCS6D02G364000	NA
TraesCS6D02G364100	Phosphate transporter PHO1-2 OS=Oryza sativa subsp. japonica OX=39947 GN=PHO1-2 PE=2 SV=1;;
TraesCS6D02G364200	Phosphate transporter PHO1-2 OS=Oryza sativa subsp. japonica OX=39947 GN=PHO1-2 PE=2 SV=1;;
TraesCS6D02G364300	Phosphate transporter PHO1-2 OS=Oryza sativa subsp. japonica OX=39947 GN=PHO1-2 PE=2 SV=1;;
TraesCS6D02G364400	COBRA-like protein 3 OS=Oryza sativa subsp. japonica OX=39947 GN=BC1L4 PE=2 SV=1;;
TraesCS6D02G364500	KIN14B-interacting protein At4g14310 OS=Arabidopsis thaliana OX=3702 GN=At4g14310 PE=1 SV=1;;
TraesCS6D02G364600	Phosphate transporter PHO1-2 OS=Oryza sativa subsp. japonica OX=39947 GN=PHO1-2 PE=2 SV=1;;
TraesCS6D02G364700	NA
TraesCS6D02G364800	NA
TraesCS6D02G364900	DNA;;
TraesCS6D02G365000	NA
TraesCS6D02G365100	Putative disease resistance protein RGA1 OS=Solanum bulbocastanum OX=147425 GN=RGA1 PE=2 SV=2;;
TraesCS6D02G365200	NA
TraesCS6D02G365300	NA
TraesCS6D02G365400	Cytochrome P450 716B1 OS=Picea sitchensis OX=3332 GN=CYP716B1 PE=2 SV=1;;
TraesCS6D02G365500	Taxadiene 5-alpha hydroxylase OS=Taxus cuspidata OX=99806 PE=1 SV=2;;
TraesCS6D02G365600	Cytochrome P450 716B1 OS=Picea sitchensis OX=3332 GN=CYP716B1 PE=2 SV=1;;
TraesCS6D02G365700	Cinnamoyl-CoA reductase 1 OS=Oryza sativa subsp. japonica OX=39947 GN=CCR1 PE=1 SV=1;;
TraesCS6D02G365800	Dehydration-responsive element-binding protein 1H OS=Oryza sativa subsp. japonica OX=39947 GN=DREB1H PE=3 SV=1;;
TraesCS6D02G365900	Cinnamoyl-CoA reductase 1 OS=Oryza sativa subsp. japonica OX=39947 GN=CCR1 PE=1 SV=1;;
TraesCS6D02G366000	NA
TraesCS6D02G366100	Dehydration-responsive element-binding protein 1H OS=Oryza sativa subsp. indica OX=39946 GN=DREB1H PE=2 SV=1;;
TraesCS7A02G088200	NA
TraesCS7A02G088300	Aspartic proteinase CDR1 OS=Arabidopsis thaliana OX=3702 GN=CDR1 PE=1 SV=1;;
TraesCS7A02G088400	Aspartic proteinase CDR1 OS=Arabidopsis thaliana OX=3702 GN=CDR1 PE=1 SV=1;;
TraesCS7A02G088500	NA
TraesCS7A02G088600	Coatomer subunit beta'-1 OS=Oryza sativa subsp. japonica OX=39947 GN=Os06g0143900 PE=2 SV=1;;
TraesCS7A02G088700	Probable sulfate transporter 3.4 OS=Arabidopsis thaliana OX=3702 GN=SULTR3;4 PE=2 SV=1;;
TraesCS7A02G088800	Pre-mRNA splicing factor SR-like 1 OS=Arabidopsis thaliana OX=3702 GN=SRL1 PE=1 SV=1;;
TraesCS7A02G088900	Pentatricopeptide repeat-containing protein At4g02750 OS=Arabidopsis thaliana OX=3702 GN=PCMP-H24 PE=3 SV=1;;
TraesCS7A02G089000	Palmitoyl-acyl carrier protein thioesterase, chloroplastic OS=Arabidopsis thaliana OX=3702 GN=FATB PE=1 SV=1;;
TraesCS7A02G089100	Polycomb group protein FIE2 OS=Zea mays OX=4577 GN=FIE2 PE=2 SV=1;;
TraesCS7A02G089200	Polycomb group protein FIE2 OS=Zea mays OX=4577 GN=FIE2 PE=2 SV=1;;
TraesCS7A02G089300	NA
TraesCS7A02G089400	Alcohol-forming fatty acyl-CoA reductase OS=Simmondsia chinensis OX=3999 PE=1 SV=1;;
TraesCS7A02G089500	Alpha carbonic anhydrase 7 OS=Arabidopsis thaliana OX=3702 GN=ACA7 PE=2 SV=1;;
TraesCS7A02G089600	Alpha carbonic anhydrase 7 OS=Arabidopsis thaliana OX=3702 GN=ACA7 PE=2 SV=1;;
TraesCS7A02G089700	Peroxidase 1 OS=Zea mays OX=4577 GN=PER1 PE=1 SV=1;;
TraesCS7A02G089800	Phosphomannomutase OS=Triticum aestivum OX=4565 PE=2 SV=1;;
TraesCS7A02G089900	Probable L-type lectin-domain containing receptor kinase II.1 OS=Arabidopsis thaliana OX=3702 GN=LECRK21 PE=2 SV=1;;
TraesCS7A02G090000	NA
TraesCS7A02G090100	NA
TraesCS7A02G090200	NA
TraesCS7A02G090300	NA
TraesCS7A02G090400	Superoxide dismutase [Fe] 2, chloroplastic OS=Oryza sativa subsp. japonica OX=39947 GN=Os06g0143000 PE=2 SV=1;;
TraesCS7A02G090500	NA
TraesCS7A02G090600	NA
TraesCS7A02G090700	Sucrose transport protein SUT5 OS=Oryza sativa subsp. japonica OX=39947 GN=SUT5 PE=1 SV=1;;
TraesCS7A02G090800	Putative F-box/LRR-repeat protein At5g02700 OS=Arabidopsis thaliana OX=3702 GN=At5g02700 PE=4 SV=1;;
TraesCS7A02G090900	Cytochrome c oxidase subunit 5b-1, mitochondrial OS=Arabidopsis thaliana OX=3702 GN=COX5B-1 PE=1 SV=1;;
TraesCS7A02G091000	Probable receptor-like protein kinase At5g20050 OS=Arabidopsis thaliana OX=3702 GN=At5g20050 PE=2 SV=1;;
TraesCS7A02G091100	Wall-associated receptor kinase 3 OS=Arabidopsis thaliana OX=3702 GN=WAK3 PE=2 SV=2;;
TraesCS7A02G091200	NA
TraesCS7A02G091300	NA
TraesCS7A02G091400	Wall-associated receptor kinase 2 OS=Arabidopsis thaliana OX=3702 GN=WAK2 PE=1 SV=1;;
TraesCS7A02G091500	Wall-associated receptor kinase 3 OS=Arabidopsis thaliana OX=3702 GN=WAK3 PE=2 SV=2;;
TraesCS7A02G091600	NA
TraesCS7A02G091700	Wall-associated receptor kinase 2 OS=Arabidopsis thaliana OX=3702 GN=WAK2 PE=1 SV=1;;
TraesCS7A02G091800	Early nodulin-93 OS=Glycine max OX=3847 PE=2 SV=1;;
TraesCS7A02G091900	Early nodulin-93 OS=Glycine max OX=3847 PE=2 SV=1;;
TraesCS7A02G092000	Early nodulin-93 OS=Glycine max OX=3847 PE=2 SV=1;;
TraesCS7A02G092100	NA
TraesCS7A02G092200	NA
TraesCS7A02G092300	6-phosphogluconate dehydrogenase, decarboxylating 1 OS=Oryza sativa subsp. japonica OX=39947 GN=G6PGH1 PE=2 SV=1;;
TraesCS7A02G092400	Putative disease resistance protein RGA3 OS=Solanum bulbocastanum OX=147425 GN=RGA3 PE=2 SV=2;;
TraesCS7A02G092500	Early nodulin-93 OS=Glycine max OX=3847 PE=2 SV=1;;
TraesCS7A02G092600	Early nodulin-93 OS=Glycine max OX=3847 PE=2 SV=1;;
TraesCS7A02G092700	Early nodulin-93 OS=Glycine max OX=3847 PE=2 SV=1;;
TraesCS7A02G092800	Early nodulin-93 OS=Glycine max OX=3847 PE=2 SV=1;;
TraesCS7A02G092900	Early nodulin-93 OS=Glycine max OX=3847 PE=2 SV=1;;
TraesCS7A02G093000	NA
TraesCS7A02G093100	Early nodulin-93 OS=Glycine max OX=3847 PE=2 SV=1;;
TraesCS7A02G093200	NA
TraesCS7A02G093300	Early nodulin-93 OS=Glycine max OX=3847 PE=2 SV=1;;
TraesCS7A02G093500	NA
TraesCS7A02G093600	Early nodulin-93 OS=Glycine max OX=3847 PE=2 SV=1;;
TraesCS7A02G093700	Probable acyl-activating enzyme 18, peroxisomal OS=Arabidopsis thaliana OX=3702 GN=AAE18 PE=2 SV=1;;
TraesCS7A02G093800	Probable carboxylesterase 5 OS=Arabidopsis thaliana OX=3702 GN=CXE5 PE=2 SV=1;;
TraesCS7A02G157800	DNA topoisomerase 2 OS=Arabidopsis thaliana OX=3702 GN=TOP2 PE=2 SV=2;;
TraesCS7A02G158200	Putative ubiquitin-like-specific protease 1B OS=Arabidopsis thaliana OX=3702 GN=ULP1B PE=5 SV=2;;
TraesCS7A02G158300	Histone H3.3 OS=Nicotiana tabacum OX=4097 GN=H3 PE=1 SV=1;;
TraesCS7A02G158400	Inositol-tetrakisphosphate 1-kinase 4 OS=Oryza sativa subsp. japonica OX=39947 GN=ITPK4 PE=2 SV=1;;
TraesCS7A02G158500	CASP-like protein 5B3 OS=Oryza sativa subsp. japonica OX=39947 GN=Os09g0249400 PE=2 SV=1;;
TraesCS7A02G158600	NA
TraesCS7A02G158700	NA
TraesCS7A02G158800	NA
TraesCS7A02G158900	Sucrose synthase 1 OS=Hordeum vulgare OX=4513 GN=SS1 PE=1 SV=1;;
TraesCS7B02G085900	Ethylene-responsive transcription factor RAP2-4 OS=Arabidopsis thaliana OX=3702 GN=RAP2-4 PE=1 SV=1;;
TraesCS7B02G086000	NA
TraesCS7B02G086100	NA
TraesCS7B02G086200	NA
TraesCS7B02G086300	Probable long-chain-alcohol O-fatty-acyltransferase 4 OS=Arabidopsis thaliana OX=3702 GN=AT4 PE=2 SV=1;;
TraesCS7B02G086400	NA
TraesCS7B02G086500	Metallophosphoesterase 1 OS=Rattus norvegicus OX=10116 GN=Mppe1 PE=2 SV=1;;
TraesCS7B02G086600	NA
TraesCS7B02G086700	Acyl carrier protein 1, mitochondrial OS=Arabidopsis thaliana OX=3702 GN=MTACP1 PE=1 SV=1;;
TraesCS7B02G086800	NA
TraesCS7B02G086900	NA
TraesCS7B02G087000	Protein CELLULOSE SYNTHASE INTERACTIVE 1 OS=Arabidopsis thaliana OX=3702 GN=CSI1 PE=1 SV=1;;
TraesCS7B02G087100	NA
TraesCS7B02G087200	Deoxyuridine 5'-triphosphate nucleotidohydrolase OS=Oryza sativa subsp. japonica OX=39947 GN=DUT PE=3 SV=1;;
TraesCS7B02G352800	DNA polymerase alpha subunit B OS=Homo sapiens OX=9606 GN=POLA2 PE=1 SV=2;;
TraesCS7B02G353000	NA
TraesCS7B02G353100	Peroxidase 3 OS=Arabidopsis thaliana OX=3702 GN=PER3 PE=2 SV=1;;
TraesCS7B02G353200	Peroxidase 3 OS=Arabidopsis thaliana OX=3702 GN=PER3 PE=2 SV=1;;
TraesCS7B02G353300	NA
TraesCS7B02G353400	NA
TraesCS7B02G353500	Protein FIZZY-RELATED 2 OS=Arabidopsis thaliana OX=3702 GN=FZR2 PE=1 SV=1;;
TraesCS7B02G353600	NA
TraesCS7B02G353700	NA
TraesCS7B02G353800	Putative disease resistance protein At1g50180 OS=Arabidopsis thaliana OX=3702 GN=At1g50180 PE=3 SV=2;;
TraesCS7B02G353900	Transcription initiation factor TFIID subunit 7 OS=Arabidopsis thaliana OX=3702 GN=TAF7 PE=1 SV=1;;
TraesCS7B02G354000	Polyubiquitin OS=Avena fatua OX=4499 PE=2 SV=2;;
TraesCS7B02G354100	NA
TraesCS7B02G354200	Polyubiquitin OS=Avena fatua OX=4499 PE=2 SV=2;;
TraesCS7B02G354300	Histone-lysine N-methyltransferase ASHH3 OS=Arabidopsis thaliana OX=3702 GN=ASHH3 PE=2 SV=2;;
TraesCS7B02G354400	Cytochrome P450 87A3 OS=Oryza sativa subsp. japonica OX=39947 GN=CYP87A3 PE=2 SV=3;;
TraesCS7B02G354500	SEC12-like protein 1 OS=Arabidopsis thaliana OX=3702 GN=PHF1 PE=1 SV=2;;
TraesCS7B02G354800	NA
TraesCS7B02G354900	Carbonic anhydrase, chloroplastic OS=Hordeum vulgare OX=4513 PE=2 SV=1;;
TraesCS7B02G355000	NA
TraesCS7B02G355100	NA
TraesCS7B02G363200	Zinc finger CCCH domain-containing protein 45 OS=Oryza sativa subsp. japonica OX=39947 GN=Os06g0677700 PE=4 SV=1;;
TraesCS7B02G363300	NA
TraesCS7B02G363500	Receptor-like protein EIX2 OS=Solanum lycopersicum OX=4081 GN=EIX2 PE=1 SV=2;;
TraesCS7B02G363600	Geranylgeranyl transferase type-2 subunit alpha 1 OS=Arabidopsis thaliana OX=3702 GN=RGTA1 PE=1 SV=1;;
TraesCS7B02G363700	Probable 3-hydroxyisobutyrate dehydrogenase, mitochondrial OS=Arabidopsis thaliana OX=3702 GN=At4g20930 PE=2 SV=3;;
TraesCS7B02G363800	Probable carboxylesterase 15 OS=Arabidopsis thaliana OX=3702 GN=CXE15 PE=2 SV=1;;
TraesCS7B02G363900	NA
TraesCS7B02G364000	B3 domain-containing protein Os11g0197600 OS=Oryza sativa subsp. japonica OX=39947 GN=Os11g0197600 PE=2 SV=1;;
TraesCS7B02G364100	Cold-responsive protein kinase 1 OS=Arabidopsis thaliana OX=3702 GN=CRPK1 PE=1 SV=1;;
TraesCS7B02G364200	Cold-responsive protein kinase 1 OS=Arabidopsis thaliana OX=3702 GN=CRPK1 PE=1 SV=1;;
TraesCS7B02G364300	Probable xyloglucan endotransglucosylase/hydrolase protein 25 OS=Arabidopsis thaliana OX=3702 GN=XTH25 PE=2 SV=2;;
TraesCS7B02G364400	Putative disease resistance protein At1g58400 OS=Arabidopsis thaliana OX=3702 GN=At1g58400 PE=3 SV=1;;
TraesCS7B02G364600	NAC domain-containing protein 21/22 OS=Arabidopsis thaliana OX=3702 GN=NAC021 PE=1 SV=2;;
TraesCS7B02G364700	Alpha-glucosidase OS=Hordeum vulgare OX=4513 PE=2 SV=1;;
TraesCS7B02G364900	Patatin-like protein 3 OS=Oryza sativa subsp. indica OX=39946 GN=PLP3 PE=3 SV=1;;
TraesCS7B02G365000	AUGMIN subunit 2 OS=Arabidopsis thaliana OX=3702 GN=AUG2 PE=1 SV=2;;
TraesCS7B02G365200	Disease resistance protein RPM1 OS=Arabidopsis thaliana OX=3702 GN=RPM1 PE=1 SV=1;;
TraesCS7B02G365300	NAC domain-containing protein 21/22 OS=Arabidopsis thaliana OX=3702 GN=NAC021 PE=1 SV=2;;
TraesCS7B02G365400	NA
TraesCS7B02G365500	Cytosolic sulfotransferase 6 OS=Arabidopsis thaliana OX=3702 GN=SOT6 PE=2 SV=1;;
TraesCS7B02G365600	Probable polyamine transporter At3g13620 OS=Arabidopsis thaliana OX=3702 GN=At3g13620 PE=2 SV=1;;
TraesCS7B02G365700	Probable LL-diaminopimelate aminotransferase, chloroplastic OS=Oryza sativa subsp. japonica OX=39947 GN=AGD2 PE=2 SV=1;;
TraesCS7B02G365800	BTB/POZ domain-containing protein At1g04390 OS=Arabidopsis thaliana OX=3702 GN=At1g04390 PE=2 SV=3;;
